1 **A cell atlas of chromatin accessibility across 25 adult human tissues**

2

3 **AUTHORS**

4

5 Kai Zhang<sup>1,6\*</sup>, James D. Hocker<sup>1-3\*</sup>, Michael Miller<sup>4</sup>, Xiaomeng Hou<sup>4</sup>, Joshua Chiou<sup>3,5</sup>, Olivier B.  
6 Poirion<sup>4</sup>, Yunjiang Qiu<sup>1</sup>, Yang E. Li<sup>1</sup>, Kyle J. Gaulton<sup>5,7</sup>, Allen Wang<sup>4</sup>, Sebastian Preissl<sup>4</sup>, Bing  
7 Ren<sup>1,4,6,7,8</sup>

8

9 1. Ludwig Institute for Cancer Research, La Jolla, CA, USA

10 2. Medical Scientist Training Program, University of California San Diego, La Jolla, CA,  
11 USA

12 3. Biomedical Sciences Graduate Program, University of California San Diego, La Jolla,  
13 CA, USA

14 4. Center for Epigenomics, University of California San Diego, La Jolla, CA, USA

15 5. Department of Pediatrics, Pediatric Diabetes Research Center, University of California  
16 San Diego, La Jolla, CA, USA

17 6. Department of Cellular and Molecular Medicine, University of California San Diego  
18 School of Medicine, La Jolla, CA, USA

19 7. Institute for Genomic Medicine, University of California San Diego, La Jolla, CA, USA

20 8. Corresponding author

21

22 \* These authors contributed equally

23

24 **CORRESPONDENCE**

25 Bing Ren, PhD ([biren@health.ucsd.edu](mailto:biren@health.ucsd.edu))

26 **SUMMARY**

27 Current catalogs of regulatory sequences in the human genome are still incomplete and lack cell  
28 type resolution. To profile the activity of human gene regulatory elements in diverse cell types and  
29 tissues in the human body, we applied single cell chromatin accessibility assays to 25 distinct  
30 human tissue types from multiple donors. The resulting chromatin maps comprising ~500,000  
31 nuclei revealed the status of open chromatin for over 750,000 candidate *cis*-regulatory elements  
32 (cCREs) in 54 distinct cell types. We further delineated cell type-specific and tissue-context  
33 dependent gene regulatory programs, and developmental stage specificity by comparing with a  
34 recent human fetal chromatin accessibility atlas. We finally used these chromatin maps to  
35 interpret the noncoding variants associated with complex human traits and diseases. This rich  
36 resource provides a foundation for the analysis of gene regulatory programs in human cell types  
37 across tissues and organ systems.

38

39 **KEYWORDS**

40 ATAC-seq; GWAS; chromatin; single cell; human tissues; chromatin accessibility; epigenetics;  
41 epigenomics; regulatory

## 42 INTRODUCTION

43

44 The human body is comprised of various organs, tissues and cell types, each with highly  
45 specialized functions. The genes expressed in each tissue and cell type – and in turn their  
46 physiologic roles in the body – are regulated by *cis*-regulatory elements such as enhancers and  
47 promoters (Carter and Zhao, 2020). These sequences dictate the expression patterns of target  
48 genes by recruiting sequence specific transcription factors (TFs) in a cell-type specific manner  
49 (Shlyueva et al., 2014). Upon binding of TFs, the regulatory elements frequently adopt  
50 conformational changes such that they are more accessible to endonucleases or transposases,  
51 enabling genome-wide discovery by combining with high throughput sequencing (Buenrostro et  
52 al., 2013; John et al., 2013; Klemm et al., 2019). However, conventional assays have, in large  
53 part, used heterogeneous tissues as input materials to produce population average  
54 measurements, and consequently, the current catalogs of candidate regulatory sequences in the  
55 human genome (Andersson et al., 2014; Meuleman et al., 2020; Moore et al., 2020; Roadmap  
56 Epigenomics et al., 2015; Shen et al., 2012) lack the information about cell type-specific activities  
57 of each element. This limitation has hampered our ability to study gene regulatory programs in  
58 distinct human cell types and to interpret the noncoding DNA in the human genome.

59

60 Genome wide association studies (GWAS) have identified hundreds of thousands of genetic  
61 variants associated with a broad spectrum of human traits and diseases. The large majority of  
62 these variants are non-coding (Claussnitzer et al., 2020). Observations that annotated *cis*-  
63 regulatory elements in disease-relevant tissues and cell types are enriched for non-coding risk  
64 variants (Ernst et al., 2011; Maurano et al., 2012; Roadmap Epigenomics et al., 2015) led to the  
65 hypothesis that a major mechanism by which noncoding variants influence disease risk is by  
66 altering transcriptional regulatory elements in specific cell types. However, annotation of these  
67 non-coding risk variants has been hindered by a lack of cell type-resolved maps of regulatory  
68 elements in the human genome. Whereas innovative approaches to distinguish causal variants  
69 from local variants in linkage disequilibrium (LD) using fine mapping (Wakefield, 2009), and to link  
70 variants to target genes using co-accessibility of open chromatin regions in single cells (Pliner et  
71 al., 2018) or 3-dimensional chromosomal contact-based linkage scores (Nasser et al., 2020),  
72 have made important strides toward the prioritization of causal variants and the prediction of their  
73 target genes, the annotation of candidate *cis*-regulatory elements (cCREs) in discrete human cell  
74 types has posed a longstanding technical challenge.

75

76 Single cell omics technologies, enabled by droplet-based, combinatorial barcoding or other  
77 approaches, have now enabled the profiling of transcriptome, epigenome and chromatin  
78 organization from complex tissues at single cell resolution (Grosselin et al., 2019; Klein et al.,  
79 2015; Lake et al., 2018; Luo et al., 2017a; Macosko et al., 2015; Preissl et al., 2018). In particular,  
80 combinatorial cellular barcoding-based assays such as single nucleus ATAC-seq (also known as  
81 sci-ATAC-seq (Cusanovich et al., 2015)) have permitted the identification of cCREs in single  
82 nuclei without the need for physical purification of individual cell types. The resulting data can be  
83 used to deconvolute cell types from mixed cell populations and to dissect cell type-specific  
84 transcriptomic and epigenomic states in primary tissues. While these tools have been applied to  
85 mammalian tissues including murine biosamples (Cusanovich et al., 2018; Lareau et al., 2019; Li  
86 et al., 2020; Preissl et al., 2018; Sinnamon et al., 2019), human fetal tissues (Domcke et al.,  
87 2020), and individual adult human organ systems (Chiou et al., 2019; Corces et al., 2020; Hocker  
88 et al., 2020; Wang et al., 2020), we still lack comprehensive maps of cCREs in the cell types  
89 comprising primary tissues of the adult human body.

90  
91 In the present study we used a modified single-cell combinatorial indexing ATAC-seq (sci-ATAC-  
92 seq) protocol optimized for flash frozen primary tissues (Hocker et al., 2020; Preissl et al., 2018)  
93 to profile chromatin accessibility in 25 adult human tissue types from multiple donors. We profiled  
94 472,373 nuclei from these tissues, grouped them into 54 cell types based on similarity in  
95 chromatin landscapes, and identified a union of 756,414 open chromatin regions and candidate  
96 CREs (cCREs) from the resulting maps. We then delineated gene regulatory programs in different  
97 human cell types, decomposed previous bulk chromatin accessibility maps, and characterized  
98 adult specific elements in different tissues and organ systems. Finally, we used the new cCRE  
99 atlas to interpret noncoding variants associated with complex human traits and diseases,  
100 demonstrating its utility in improving our understanding of polygenic human traits and revealing  
101 clinically relevant therapeutic targets for complex diseases. We created an interactive web atlas  
102 to disseminate this resource [CATLAS, Cis-element ATLAS] <http://catlas.org/humantissue>.

## 103 **RESULTS**

104

### 105 **Single cell chromatin accessibility analysis of adult human primary tissues**

106

107 In order to generate a cell type-resolved atlas of cCREs in the adult human body, we performed  
108 sci-ATAC-seq (Cusanovich et al., 2015; Preissl et al., 2018) with 70 primary tissue samples  
109 collected from 25 distinct anatomic sites in four postmortem adult human donors (Figure 1A, Table  
110 S1). Tissue samples were chosen to survey a breadth of human organ systems, including nine  
111 tissue types from across the gastrointestinal tract, four tissue types from the heart and peripheral  
112 vasculature, four female reproductive tissue types, three different endocrine tissue types, two  
113 tissue types from the integumentary system, and single tissue types from the muscular, peripheral  
114 nervous, and respiratory systems. Isolation of intact nuclei from these diverse primary tissue  
115 types, which differed in their nuclear compositions and sensitivities to mechanical dissociation,  
116 presented a technical challenge. We thus optimized nuclear isolation methods and buffer  
117 conditions for each tissue type (Table S2, see Methods). Subsequently, we generated sci-ATAC-  
118 seq datasets using a semi-automated workflow (Hocker et al., 2020; Li et al., 2020; Preissl et al.,  
119 2018) and sequenced resulting libraries to 7,651 raw sequence reads per nucleus on average,  
120 with a median read duplication rate of 44% (Table S3). Open chromatin fragments from these  
121 libraries were computationally assigned to individual nuclei using nucleus-specific DNA barcodes.  
122 We next filtered the single nucleus profiles based on stringent quality control criteria including an  
123 enrichment of reads at transcription start sites (TSS enrichment; TSSe) greater than 7-fold, and  
124 a minimum of > 1,000 mapped chromatin fragments per nucleus. Nuclei were further filtered for  
125 potential doublets, instances of 2 or more nuclei sharing a common barcode, using a version of  
126 Scrublet (Wolock et al., 2019) modified for sci-ATAC-seq (see Methods). Ultimately, we obtained  
127 high quality open chromatin profiles for 472,373 nuclei, with a median of 3,071 unique open  
128 chromatin fragments per nucleus and an average TSSe of  $13.6 \pm 4.5$  per nucleus (Figure 1B,  
129 Figure S1, Table S3).

130

131 Analyzing large and sparse single cell chromatin accessibility datasets has been challenging.  
132 According to a recent assessment of 10 popular computational methods for analyzing single cell  
133 ATAC-seq data (Chen et al., 2019), SnapATAC was the only method able to cluster > 80,000 cells  
134 without sacrificing accuracy. In the latest development of SnapATAC, we utilized the Nyström  
135 method (Bouneffouf and Birol, 2016) to further improve the scalability of the algorithm to handle  
136 millions of cells, an indispensable feature for atlas-scale studies. When dealing with samples from

137 diverse biological backgrounds, individual and batch effects are inevitable and pose further  
138 challenges to integrative analysis. We built upon the Mutual Nearest Neighbor batch-effect-  
139 correction method (Haghverdi et al., 2018) to develop a variant called Iterative Mutual Nearest  
140 Centroid algorithm to correct for donor or batch effects with added scalability and flexibility (Figure  
141 S2A-C, see Methods). After dimensionality reduction and batch correction, we applied the Leiden  
142 algorithm (Traag et al., 2019) to identify cell clusters. To determine the optimal number of cell  
143 types present in the dataset, we surveyed the stability of clustering results upon simulated  
144 perturbation under different parameters (Figure S2D, see Methods). This analysis yielded a total  
145 of 54 distinct clusters with high reproducibility and diversity (Figure 1B, Figure S2C-D, Table S4).

146

### 147 **Annotation of major and sub-classes of human cell types**

148

149 To annotate the resulting cell clusters, we first curated a set of marker genes from the PanglaoDB  
150 single cell RNA-seq marker gene database (Franzén et al., 2019) corresponding to expected  
151 human cell types. We utilized chromatin accessibility at the promoter, defined as  $\pm 1000$  bp relative  
152 to transcription start sites (TSS), as a proxy for gene activity and computed cell-type enrichment  
153 scores for each of the 54 clusters, and created initial cell cluster annotations based on these cell-  
154 type enrichment scores (Figure S3A, see Methods). We next manually reviewed these  
155 assignments and made adjustments based on focused consideration of marker gene accessibility.  
156 Reassuringly, enrichment of Gene Ontology (GO) terms for genes linked to restricted peaks in a  
157 given cluster was in agreement with presumed functions of assigned cell types (Figure S4).  
158 Finally, we compared our single-cell chromatin accessibility atlas with a recent single cell  
159 transcriptional atlas of adult human tissues (Han et al., 2020). Correlating promoter accessibility  
160 profiles from sci-ATAC-seq clusters with gene expression profiles from scRNA-seq clusters, we  
161 found that the cell types with the highest correlation across datasets were concordantly annotated  
162 in the majority of cases (Figure S3B). Altogether, we were able to annotate 53 of the 54 clusters  
163 (98%) with a cell type label (Table S5). For example, we annotated three macrophage clusters  
164 based on accessibility at marker genes including *MS4A7* (Gingras et al., 2001), and one adipocyte  
165 cluster based on accessibility at *ADIPOQ* (Hu et al., 1996) (Figure 1C). Encouragingly, prevalent  
166 cell types detected in a majority of tissue samples including macrophages, lymphocytes,  
167 endothelial cells, and smooth muscle cells clustered based on cell type rather than tissue of origin  
168 or individual (Figure 1C, Table S4, Figure S5).

169

170 Most of these cell types were found to exhibit high tissue specificity. For example, some highly  
171 specialized cell types such as granulosa cells, follicular cells, parietal cells, chief cells,  
172 pneumocytes, keratinocytes, and hepatocytes were restricted to only one tissue type, reflecting  
173 their tissue-specific functions (Figure 1C, Table S4, Figure S5). We further annotated five clusters  
174 of lower gastrointestinal (GI) tract epithelial cells that could be classified as either enterocytes or  
175 goblet cells, but which were differentially clustered according to whether nuclei originated in the  
176 small intestine (Enc. 2, Gbl.2) or colon (Enc.1 & 3, Gbl.1; Figure 1C). On the other hand, tissue-  
177 resident fibroblasts unbiasedly clustered into six subtypes with diverse tissues of origin for each  
178 (Fib.1-6; Figure 1C). Our analysis also revealed rare cell types with distinct chromatin accessibility  
179 profiles such as mesothelial cells (0.58% of total nuclei) and satellite cells or muscle stem cells  
180 (0.17% of total nuclei). During annotation, we noticed that some cell clusters appeared to contain  
181 multiple closely related but distinct cell types. For example, the neuroendocrine cell cluster  
182 consisted of cells from both stomach and pancreas, likely representing a mixture of pancreas-  
183 and stomach-specific hormone-producing cells. To further dissect the heterogeneity within our  
184 identified cell clusters, we performed another round of clustering on cell clusters that contained at  
185 least 1,000 nuclei and showed minimal batch effects (see Methods). We were able to identify  
186 more than one subcluster in 15 out of 27 major cell classes satisfying the above criteria (Figure  
187 S6A). In particular, the neuroendocrine cell cluster was further divided into three clusters that  
188 could be annotated as beta cells, alpha cells, and gastric neuroendocrine cells based on  
189 accessibility at marker genes including *INS*, *GCG*, and *GHRL*, respectively (Chiou et al., 2019;  
190 Kojima et al., 1999) (Figure S6). Moving forward, we focused our subsequent analyses on the 54  
191 cell clusters defined by our initial data-driven approach due to our high level of confidence in their  
192 stability, reproducibility, and cell type annotation.

193

## 194 **An atlas of cCREs in adult human cell types**

195

196 We annotated cCREs in each of the 54 primary cell types defined above. To do so, we aggregated  
197 chromatin accessibility profiles from all nuclei comprising each cell cluster and identified open  
198 chromatin regions using the MACS2 software package (Zhang et al., 2008) (Figure 2A). We then  
199 merged peaks from all cell clusters to form a union set of 756,414 open chromatin regions and  
200 termed these as cCREs (Figure 2A-C, Table S6, Supplementary file with accessibility for each  
201 cCRE downloadable from <http://catlas.org/humantissue>). These cCREs covered 11.4% of the  
202 human genome, and 92.7% of them overlapped with previously annotated cCREs based on bulk  
203 DNase-seq and ChIP-seq assays of human tissues, cell lines, and primary cell biosamples by the

204 ENCODE consortium (Meuleman et al., 2020; Moore et al., 2020) (Figure 2B). Genome-wide,  
205 cCREs located at transcription start sites or near promoter regions tended to have elevated  
206 chromatin accessibility, were less likely to vary between different cell types, and displayed higher  
207 levels of sequence conservation than gene-distal cCREs and genomic background (Figure 2D-  
208 E). By contrast, gene-distal cCREs tended to be more variable chromatin accessibility (Figure  
209 2D), suggesting the presence of shared programs of highly accessible promoter-proximal cCREs  
210 alongside variable programs of gene-distal cCREs across human cell types.

211  
212 To assess the function of the above cCREs, we compared them with current catalogs of validated  
213 enhancers (Visel et al., 2007) and expression quantitative trait loci (eQTLs) - sequence variants  
214 that are statistically correlated with changes in gene expression in a tissue-specific fashion  
215 (Consortium, 2020). We first compared our cCREs with the VISTA database (Visel et al., 2007),  
216 and found that they were enriched for enhancers validated in transgenic mice in a cell type-  
217 specific fashion (Figure 2F). We next asked whether our cCREs were enriched for eQTLs  
218 annotated by the GTEx Project in the 25 matching adult tissue types. We discovered cell type-  
219 specific enrichments for 24 out of 25 sets of tissue eQTLs (Figure 2G). As expected, tissue eQTLs  
220 were most strongly enriched within cCREs when the corresponding cell type comprised a large  
221 proportion of nuclei identified in the tissue (Figure S7). For example, thyroid tissue eQTLs were  
222 strongly enriched within cCREs annotated in follicular cells ( $p = 0.0024$ ), which made up 90.4%  
223 of total nuclei from thyroid tissue. On the other hand, tissue eQTLs from heterogenous tissue  
224 types such as transverse colon tended to display weaker overall enrichment in cell type cCREs,  
225 as well as a tendency to be enriched within cCREs of prevalent cell types that could be identified  
226 in most primary tissues, such as endothelial cells (Figure 2G, Figure S7). Taken together, these  
227 results suggest that bulk tissue eQTLs best represent sequence variants associated with gene  
228 expression for abundant cell types and homogenous tissues, and may be less representative for  
229 rarer cell types within homogenous tissues or for unique cell types from heterogenous tissues.

230

### 231 **Delineation of cell-type specificity of human cCREs**

232

233 Cell fate determination in part depends on the establishment of specific *cis*-regulatory programs  
234 modulating gene expression. To characterize the cell-type specificity of cCREs, we organized the  
235 756,414 cCREs into 51 *cis*-regulatory modules (CRMs), with elements in each CRM sharing  
236 similar chromatin accessibility patterns across all the cell types defined in the current study (Figure  
237 3A, see Methods). We further annotated candidate functions of CRMs based on GREAT biological



238 process ontology terms (McLean et al., 2010) (Figure 3B, Table S7). These analyses revealed  
239 that the majority of CRMs were limited either to single cell types or to groups of cell types that  
240 reflected cellular lineages. For example, one CRM related to the maintenance of gastrointestinal  
241 epithelium showed preferential accessibility in goblet cells (Module 8; Figure 3A-B), whereas two  
242 additional CRMs related to regulation of actin filament organization and glucose transport showed  
243 strong shared accessibility across all lower gastrointestinal epithelial cell types, including both  
244 goblet cells and enterocytes (Modules 9 and 10; Figure 3A-B). Broadly, CRM annotations  
245 reflected the physiologic functions of the cell types with which they were associated. For example,  
246 follicular cells were enriched for a CRM related to the regulation of iodide transport, hepatocytes  
247 for a CRM related to steroid metabolism, and skeletal myocytes for CRMs related to the regulation  
248 of muscle structure development (Modules 12, 14 and 34; Figure 3A-B).

249  
250 Cell type-specific *cis*-regulatory programs arise from combinatorial actions of sequence-specific  
251 TFs. To investigate the extent to which DNA sequence determined the cell type-specific  
252 accessibility patterns manifested in the 51 CRMs defined above, we trained a 51-class  
253 convolutional neural network using genomic sequence as the sole feature to predict module  
254 membership for each cCRE, and measured the area under the resulting ROC curve (AUROC) as  
255 a metric of classifier performance (Figure S8, see Methods). For 44 out of 51 modules, cCRE  
256 sequence alone could predict module membership with an AUROC > 0.80 (Figure 3C),  
257 suggesting that DNA sequence may play a pivotal role in forming diverse CRMs across cell types.  
258 To derive the sequence features that allowed our neural network to distinguish between cCRE  
259 modules, we applied the Transcription Factor Motif Discovery from Importance Scores (TF-  
260 MoDISco) software package, which deciphers consolidated motifs learned by DNA sequence-  
261 based neural networks (Shrikumar et al., 2018). Comparing these learned motifs with catalogued  
262 TF motifs (Weirauch et al., 2014) revealed module-specific TF motifs (Figure 3C). For example,  
263 sequence features matching the SP1 motif distinguished a module with strong accessibility in all  
264 identified cell types from other modules, consistent with the original description of SP1 as a  
265 regulator of ubiquitously-expressed housekeeping genes (Black et al., 2001) (Module 1; Figure  
266 3C). Similarly, sequence features matching the NKX2 motif distinguished a module unique to  
267 pneumocytes, in line with the role of NKX2 in regulating the production of pulmonary surfactant  
268 (Bingle, 1997; Bohinski et al., 1994) (Module 13; Figure 3C). In addition to previously-  
269 characterized associations, we also report previously undefined TF associations with adult human  
270 cell types that are challenging to study in their *in vivo* tissue contexts: for example, the motif of  
271 the FOX TF family (Golson and Kaestner, 2016) differentiated modules accessible in gastric chief

272 cells and parietal cells (Module 17; Figure 3C), and the motif of the KLF family (McConnell and  
273 Yang, 2010) differentiated a module accessible in adrenal cortical cells (Module 43; Figure 3C).

274

### 275 **Decomposition of bulk chromatin accessibility data using single cell chromatin atlas**

276

277 Previous studies to assay chromatin accessibility have utilized biosamples including primary  
278 tissues, marker-isolated primary cells, cultured primary cells, *in vitro* differentiated cell lines, and  
279 immortalized cell lines (Kundaje et al., 2015; Meuleman et al., 2020; Moore et al., 2020;  
280 Stunnenberg et al., 2016). In order to quantify how closely these datasets from bulk assays  
281 resembled chromatin signatures from individual adult human cell types profiled in the current  
282 study, we compiled publicly available bulk ATAC-seq and DNase-seq datasets and measured  
283 their correlation with adult human cell type chromatin accessibility profiles from sci-ATAC-seq.  
284 Biosamples exhibited a wide range of correlation scores with human cell types. In aggregate  
285 however, primary cell type biosamples resembled adult cell types profiled in the current study  
286 more closely than did bulk tissue or cell line biosamples (Figure S9, Table S8).

287

288 Analysis of chromatin accessibility in bulk primary human cancer biosamples from The Cancer  
289 Genome Atlas (TCGA) (Cancer Genome Atlas Research et al., 2013) has been shown to be a  
290 powerful tool for the characterization of abnormal gene regulatory elements in cancer and the  
291 classification of tumor subtypes with prognostic importance (Corces et al., 2018), but previous  
292 analyses were performed on bulk tumor samples and lacked information about the cell types  
293 responsible for signature chromatin accessibility patterns. We thus used our cell atlas to  
294 deconvolute bulk chromatin accessibility datasets from human primary tumor biosamples (Corces  
295 et al., 2018) into non-tumor cell classes based on chromatin accessibility features. We developed  
296 a support vector regression (SVR) based method for deconvolution. We showed that our method  
297 performed well on a variety of benchmarking datasets (median coefficient of determination =  
298 0.941, Figure S10A), and that the performance was robust against the choice of features, a wide  
299 range of sequence depths, and the introduction of artificial noise (Figure S10B-E, see Methods).  
300 We further benchmarked this approach by deconvoluting 21 bulk DNase-seq datasets from  
301 human stomach tissue, which revealed signatures of parietal cells across life stages but  
302 signatures of gastric chief cells only in child and adult timepoints, consistent with the histologic  
303 appearances of these cell types in the developing human stomach (Roy and Roy, 2016). We  
304 finally applied our deconvolution approach to 275 bulk ATAC-seq biosamples from 13 primary  
305 cancer types, and found that predicted cell type composition varied greatly between cancer types

306 (Figure S10G). For example, whereas primary thyroid carcinomas (THCA), adrenocortical  
307 carcinomas (ACC), and liver hepatocellular carcinomas (LIHC) contained biosamples with  
308 dominant chromatin signatures from follicular cells, adrenal cortical cells, and hepatocytes  
309 respectively, primary stomach adenocarcinomas (STAD) contained a mixture of biosamples with  
310 chromatin signatures from immune cells, goblet cells, enterocytes, and parietal cells. Primary  
311 breast invasive carcinomas (BRCA) in particular showed a marked variety of cell type signatures,  
312 containing biosamples with chromatin signatures from mammary luminal epithelial cells, general  
313 epithelial cells, basal cells, airway goblet cells, and adipocytes (Figure S10H). Based on these  
314 chromatin signatures, breast cancer biosamples could be further categorized into cellular  
315 subtypes that corresponded with bulk gene expression patterns as well as prognostic features  
316 (Figure S10I-K).

317

### 318 **Identification and characterization of adult-specific human cCREs**

319

320 We next compared adult cell type chromatin accessibility signatures with their corresponding fetal  
321 cell types in order to investigate life stage-specific chromatin signatures. Drawing from a recent  
322 cell atlas of chromatin accessibility in human fetal tissues (Domcke et al., 2020), we first selected  
323 fetal tissue types that matched those assayed in the current study and quantified correlations  
324 between fetal and adult cell types based on chromatin accessibility over a merged set of cCREs  
325 (see Methods). Out of 41 adult cell types from matching tissue types, 31 had chromatin signatures  
326 that were significantly correlated with at least one fetal cell type (Figure 4A). Interestingly, while  
327 some of these cell types such as cardiomyocytes, Schwann cells, and endothelial cells exhibited  
328 highly correlated chromatin signatures between fetal and adult stages ( $P < 0.01$ ), other  
329 comparably specialized adult cell types, such as satellite cells and skeletal myocytes, were not  
330 significantly correlated with their fetal counterparts (Figure 4A). Comparing chromatin accessibility  
331 between fetal and adult stages genome-wide, we found a total of 208,024 adult-specific cCREs  
332 (Figure 4B).

333

334 To uncover the gene regulatory programs that may underlie developmental functions, we next  
335 determined adult and fetal-specific cCREs in cell types that showed pronounced differences in  
336 chromatin accessibility between life stages. Skeletal myocytes, for example, differentiate  
337 substantially during pre and post-natal development (Chal and Pourquié, 2017) and showed  
338 poorer correlation between life stages than other human cell types (Figure 4A). In total, we  
339 identified 23,841 differentially accessible (DA) cCREs between fetal and adult skeletal myocytes

340 (Figure 4C). DA cCREs in fetal myocytes were associated with biological processes such as  
341 muscle filament sliding and sarcomere organization, and were strongly enriched for motifs of  
342 myogenic regulatory TFs (MRFs) which orchestrate normal myogenesis (Mary Elizabeth Pownall  
343 et al., 2002), including myogenic factor 5 (Myf5), myogenin (MyoG), and myoblast determination  
344 factor (MyoD) (Figure 4C-D), highlighting the potential role of these elements in regulating  
345 myogenic processes and the expression of fetal-specific myosin isoforms. On the other hand,  
346 adult skeletal myocyte DA cCREs were associated with biological processes related to  
347 glucocorticoid response and regulation of muscle adaptation, and were enriched for the motifs of  
348 AP-1 complex members Fra2, Atf3, and BATF (Figure 4C-D), suggesting a potential role for these  
349 elements in regulating transcriptional responses to steroid hormones and adaptation to the  
350 differential contractile activity and loading conditions of adult skeletal muscle. In line with our  
351 ontology results and with established patterns of myosin isoform expression across the human  
352 lifespan (Schiaffino and Reggiani, 2011; Schiaffino et al., 2015; Stuart et al., 2016), we discovered  
353 DA cCREs at loci encoding marker genes of pre-natal myocytes including *MYH3* and *MYH8*, the  
354 heavy chains of embryonic and neonatal myosin respectively, as well as markers of type I (slow)  
355 and type II (fast) twitch adult myocytes including *MYH6* and *MYH1/MYH2* respectively (Figure  
356 4E).

357  
358 Encouraged by these findings, we next examined differences in chromatin accessibility between  
359 fetal and adult satellite cells or muscle stem cells (Yin et al., 2013), which similarly to skeletal  
360 myocytes were not significantly correlated between life stages (Figure 4A). Fetal satellite cells are  
361 highly proliferative and play an important role in the rapid expansion of skeletal muscle mass in  
362 the pre-natal period, whereas adult satellite cells represent a small pool of quiescent myocyte  
363 precursors (Chal and Pourquié, 2017). Thus, knowledge of the regulatory elements that modulate  
364 these processes could yield important insights into the regulation of muscle regeneration. Our  
365 analysis revealed 22,082 differentially accessible (DA) cCREs between fetal and adult satellite  
366 cells (Figure 4F). The DA cCREs in fetal satellite cells were associated with biological processes  
367 such as DNA replication-dependent nucleosome assembly and triglyceride biosynthesis, and  
368 similarly to fetal skeletal myocytes were also enriched for the motifs of the MRFs Myf5 and MyoG.  
369 By contrast, adult satellite cell DA cCREs showed unexpected associations with biological  
370 processes related to regulation of hemopoiesis and immune responses, and were enriched for  
371 the binding sites of AP-1 complex members Atf3, Fos, and Fra1 (Figure 4F-G). Fetal satellite cells  
372 contained DA cCREs at genes including *MYOG* as well as *CCND2* and *RGCC*, which encode  
373 proteins involved in the regulation of myogenesis and cell cycle progression respectively (Figure

374 4H). Adult satellite cells, in following with ontology results related to immune system processes,  
375 contained DA cCREs located at loci encoding genes involved in inflammatory responses such  
376 *TLR4*, as well as *BMP4*, a transforming growth factor- $\beta$  superfamily member with roles in  
377 embryonic development (Wang et al., 2014) that inhibits myogenic differentiation in murine  
378 muscle-derived stem cells (Wright et al., 2002). We also detected adult satellite cell DA cCREs at  
379 the locus encoding *CEBPB*, a regulator of myeloid gene expression (Huber et al., 2012) whose  
380 deficiency results in impaired muscle fiber regeneration (Marchildon et al., 2016; Ruffell et al.,  
381 2009) and whose expression in levels in peripheral blood samples correlate with muscle strength  
382 in human adults (Harries et al., 2012). Taken together, these findings reveal the regulatory  
383 elements that may underlie the proliferative capacity and quiescent nature of fetal and adult  
384 satellite cells respectively, and emphasize the value of this dataset alongside emerging human  
385 cell atlases collected at different timepoints along the lifespan for determining life stage-specific  
386 gene regulatory programs at cell type resolution.

387

#### 388 **Chromatin features of fibroblasts in different tissue environments**

389

390 Fibroblasts are the most common cells in connective tissues, and they play a critical role in  
391 orchestrating the development and morphogenesis of tissues and organs. It has become  
392 increasingly recognized that fibroblasts at different locations in the human body display distinct  
393 functions and morphologies (Chang et al., 2002; Muhl et al., 2020). However, the chromatin  
394 accessibility landscape in different fibroblast subtypes remains poorly understood. This sci-ATAC-  
395 seq dataset spanning human tissue types afforded us the opportunity to examine differences in  
396 chromatin accessibility between cellular subtypes distributed across organ systems. For example,  
397 our clustering analysis revealed six subtypes of tissue-resident fibroblasts comprised of nuclei  
398 from different tissue environments (Figure 5A). While all of these subtypes showed comparable  
399 chromatin accessibility at a set of core fibroblast cCREs, each also showed subtype-specific  
400 chromatin accessibility patterns, which were enriched for ontology terms that suggested potential  
401 subtype-specific functions (Figure 5A-B). For example, Fib.5, the fibroblast subtype derived in  
402 large proportion from sigmoid colon tissue (Figure 5A, Table S4), was enriched for biological  
403 processes related to gastrointestinal smooth muscle contraction. Fib.6, the fibroblast subtype  
404 derived mostly from hepatic and adrenal tissue – two highly-vascularized organ systems in the  
405 body, was enriched for biological processes related to positive regulation of angiogenesis (Figure  
406 5B).

407

408 We next examined TF motif enrichment within core and subtype-specific fibroblast cCREs. Core  
409 fibroblast cCREs were enriched for motifs of the bZIP family TF CEBPA and the bHLH family TF  
410 TWIST2 (Figure 5C). On the other hand, subtype-specific cCREs showed strong enrichments for  
411 diverse TF motifs. Encouraged by these findings, we further performed transcriptional network  
412 analysis using the PageRank algorithm (Zhang et al., 2019) to identify candidate driver TFs in  
413 each fibroblast subtype. For example, Fib.1, the fibroblast subtype derived broadly from skin,  
414 adipose, artery, skeletal muscle, and tibial nerve tissues, was enriched for the homeobox family  
415 TF GSC which is a conserved regulator of gastrulation and organogenesis in many species (Blum  
416 et al., 1992; Izpisua-Belmonte et al., 1993; Niehrs et al., 1993) (Figure 5D). In humans, mutations  
417 in the gene encoding GSC can lead to a syndrome of short stature, auditory canal atresia,  
418 mandibular hypoplasia, and skeletal system abnormalities (Parry et al., 2013). Interestingly, Fib.3,  
419 the fibroblast subtype derived predominantly from cardiac tissue, was enriched for TFs GATA4  
420 and TBX20 which regulate cardiac organogenesis and adult cardiomyocyte function (Perrino and  
421 Rockman, 2006; Shen et al., 2011; Singh et al., 2005). Fib.3 also showed strong accessibility at  
422 the genes encoding these TFs, but did not show accessibility at other cardiomyocyte marker  
423 genes (Figure 5E). Together, these findings are in line with recent characterizations of unexpected  
424 cardiogenic gene programs in cardiac fibroblasts (Furtado et al., 2014). We finally compared  
425 subtype-specific cCREs with chromatin profiles from *in vitro* cultured fibroblast biosamples and  
426 cardiac fibroblasts from sci-ATAC-seq (Hocker et al., 2020). While all fibroblast subtypes from the  
427 current study showed similarity to *in vitro* fibroblasts based on core fibroblast cCRE signatures,  
428 only the fibroblast subtype Fib.3 matched previously reported cardiac fibroblasts based on  
429 subtype-specific fibroblast cCRE signatures (Figure 5F), suggesting that fibroblast subtype-  
430 specific signatures are environment dependent and may be lost during *in vitro* culturing. Overall,  
431 these findings reveal a core regulatory program for adult tissue resident fibroblasts distributed  
432 across human organ systems, as well as the chromatin features and TFs that may regulate more  
433 specialized roles of tissue-resident fibroblast subtypes.

434

### 435 **Association of human cell types with risk variants for complex traits and diseases**

436

437 Genetic variants associated with complex diseases and traits from GWAS predominantly reside  
438 in non-coding regions of the genome (Claussnitzer et al., 2020) and are enriched in cCREs in a  
439 tissue and cell type-specific fashion (Corces et al., 2020; Cusanovich et al., 2018; Domcke et al.,  
440 2020; Hocker et al., 2020; Maurano et al., 2012; Song et al., 2020; Song et al., 2019). To examine  
441 the genome-wide enrichment of disease and trait associated variants within cCREs annotated in

442 each of the 54 human cell types characterized in the current study, we performed cell type-  
443 stratified linkage disequilibrium score regression (LDSC) analysis using GWAS summary  
444 statistics for 56 phenotypes including diseases and non-disease traits (Figure 6A-B, Table S9,  
445 See Methods). This analysis revealed a total of 163 significant associations between 38 cell types  
446 and 40 complex phenotypes (Figure 6A-B). These enrichments revealed expected cell type-  
447 disease relationships - for example, multiple sclerosis variants were strongly enriched in cCREs  
448 detected in B cells and T cells (Consortium, 2019) (False Discovery Rate (FDR) < 0.001), type 2  
449 diabetes variants were strongly enriched in neuroendocrine cell cCREs, likely because of  
450 contributions from pancreatic beta cells (Figure S3) (Chiou et al., 2019) (FDR < 0.001), and  
451 Alzheimer's disease variants were enriched in macrophage cCREs (FDR < 0.05) in line with their  
452 reported strong enrichment in microglial populations (Nott et al., 2019). Notably however, our  
453 analysis also revealed disease-cell type relationships for *in vivo* adult human cell types not  
454 presently annotated by bulk DNase-seq or ATAC-seq data. These included a strong enrichment  
455 of coronary artery disease variants in vascular smooth muscle cCREs (FDR < 0.01), a strong  
456 enrichment of HDL cholesterol level-associated variants in adipocyte cCREs (FDR < 0.01), and a  
457 nominal enrichment of ulcerative colitis variants in gastrointestinal goblet cell cCREs (P < 0.05)  
458 in addition to T lymphocyte cCREs (FDR < 0.01). Further, we detected differences in the  
459 enrichment of disease and trait variants in subtypes of tissue resident fibroblasts. While all  
460 fibroblast populations were enriched for variants associated with standing height to an equivalent  
461 degree (FDR < 0.001), only Fib.3, the fibroblast subtype derived mostly from heart atrial  
462 appendage and left ventricle, showed a significant enrichment for coronary artery disease variants  
463 (FDR < 0.05). Similarly, all three fibroblast subtypes with major contributions from gastrointestinal  
464 tissues including the esophagus (Fib.2), stomach and lower gastrointestinal tract (Fib.4), and  
465 sigmoid colon (Fib.5) were strongly enriched for diverticular disease-associated variants, whereas  
466 those derived mostly from cardiac tissue (Fib.3) and liver/adrenal tissue (Fib.6) were not.

467

#### 468 **Systematic interpretation of molecular functions for non-coding risk variants**

469

470 Many non-coding disease-associated genetic variants are hypothesized to alter the expression of  
471 disease-associated genes by disrupting TF binding to *cis*-regulatory elements. However, without  
472 comprehensive annotations of cCREs at cell type resolution across the human body, the  
473 molecular functions of these variants have proven challenging to interpret (Claussnitzer et al.,  
474 2020). We sought to apply our atlas of cCREs in adult human cell types to systematically interpret  
475 molecular mechanisms for genetic variants associated with complex traits and diseases.

476  
477 First, we determined the probability that variants from 48 GWAS were causal for disease or trait  
478 association (Posterior probability of association, PPA) using Bayesian fine-mapping (Wakefield,  
479 2009). We defined likely causal variants as variants with a PPA > 0.1, and found that they were  
480 more likely to reside within cCREs than the rest of the variants (Figure S11A). Overall, we  
481 detected 2,730 likely causal variants residing within cCREs mapped in various human cell types  
482 (Figure 7A-B, Table S10). Second, we analyzed previously published promoter capture HiC data  
483 in similar tissues (Jung et al., 2019) and linked our cCREs to target genes via the Activity-by-  
484 Contact (ABC) model (Fulco et al., 2019) (See Methods). This analysis revealed 3,926,564 unique  
485 distal cCRE-to-gene linkages across our 54 cell types, with a median of 760,954 total linkages  
486 and 15,680 cell type-specific linkages per cell type (Figure S11B-C; Supplementary files with  
487 distal cCRE to gene linkages downloadable from <http://catlas.org/humantissue>). Of the 2,730  
488 cCREs containing likely causal variants, we linked 1,843 to putative target genes (Figure 7A).  
489 Third, we applied our recently developed deltaSVM models for 94 TFs (Yan et al., 2021) to identify  
490 the variants potentially disrupting binding by these regulators. This analysis found 460 TF binding  
491 sites that could be significantly altered by the likely causal variants (Figure 7A). The intersection  
492 of these lists prioritized 302 likely causal GWAS variants that 1) resided within a human cell type  
493 cCRE, 2) significantly altered TF binding 3) and were linked to one or more target genes (Figure  
494 7A-B, Table S10).

495  
496 For example, one likely causal risk variant for ulcerative colitis (rs16940186) resided within an  
497 intergenic cCRE restricted to epithelial cells of the gastrointestinal tract including enterocytes,  
498 gastric parietal and chief cells, and goblet cells (Figure 7C). The cCRE containing rs16940186  
499 was predicted to contact the transcription start site of *IRF8* (ABC score > 0.02), which encodes a  
500 TF involved in the regulation of immune cell maturation (Salem et al., 2020) and regulation of  
501 innate immunity in gastric epithelial cells (Yan et al., 2016). The rs16940186 risk allele is an eQTL  
502 associated with increased *IRF8* expression in human colon tissue and, consistent with these  
503 findings, SNP-SELEX motif disruption analysis predicted this risk allele to create a binding site for  
504 the ETS family of activating TFs (Figure 7C), which are expressed in intestinal epithelia and have  
505 been suggested to regulate intestinal epithelial maturation (Jedlicka et al., 2009). One other  
506 prioritized likely causal risk variant for osteoarthritis (rs75621460) resided within a cCRE that was  
507 primarily accessible in immune cell types, was predicted to target the immunosuppressive  
508 cytokine gene *TGFB1*, and disrupted a binding site for the zinc-finger TF ERG1 (Figure 7D).



## 509 DISCUSSION

510

511 Detailed knowledge of the regulatory programs that govern gene expression in the human body  
512 has key implications for understanding human development and disease pathogenesis. Here, we  
513 used a single cell ATAC-seq method to profile chromatin accessibility in 472,373 cells across 25  
514 adult human tissues representing a wide range of human organ systems, and to produce a cell-  
515 type resolved human cCRE atlas. The resulting maps bridge a key gap in the annotation of  
516 candidate regulatory elements in the human genome by providing state of activities of each  
517 element across 54 major cell classes. We used this atlas to reveal *cis*-regulatory programs and  
518 transcriptional regulators of adult human cell types, and characterized regulatory programs that  
519 may govern the tissue and subtype-specific functions of widely distributed cell types such as  
520 fibroblasts. We further incorporated this dataset alongside single cell chromatin accessibility data  
521 from human fetal tissues (Domcke et al., 2020), to reveal the regulatory elements that may govern  
522 life stage-specific cellular roles. The atlas of chromatin accessibility reported here is thus highly  
523 complementary to emerging atlases of chromatin accessibility in human fetal tissues (Domcke et  
524 al., 2020) and in individual human organ systems (Chiou et al., 2019; Corces et al., 2020; Hocker  
525 et al., 2020; Wang et al., 2020). Integration of these datasets along with future human single cell  
526 datasets of increasing scale, breadth, and depth will enable a comprehensive understanding of  
527 gene regulatory features of human cell types throughout the lifespan.

528

529 While genome-wide association studies (GWAS) have been broadly used to enhance our  
530 understanding of polygenic human traits and reveal clinically-relevant therapeutic targets for  
531 complex diseases, to date the discovery of new variants has far outpaced our ability to interpret  
532 their molecular functions (Claussnitzer et al., 2020). A central goal of the current study was thus  
533 to leverage novel maps of cCREs in adult human cell types to interpret the molecular functions of  
534 noncoding risk variants for complex disease. By applying our datasets alongside cutting-edge  
535 methods to prioritize likely causal variants in LD, link distal cCREs to target genes, and predict  
536 motifs altered by risk variants, we created a framework to systematically interpret noncoding risk  
537 variants and provided a resource of overlapping cCREs, associated cell types, potentially  
538 disrupted TFs, and putative gene targets for a host of fine mapped variants. For example, we  
539 highlight the likely causal ulcerative colitis-associated variant rs16940186. This risk variant may  
540 function to increase *IRF8* expression in gastrointestinal epithelial cells by creating a binding site  
541 for ETS family TFs in a GI epithelial-specific enhancer, and thereby alter the transcriptional  
542 responses of intestinal epithelial cells to inflammatory cytokines. Pending functional validation

543 experiments, our results suggest that targeting *IRF8* in GI epithelial cells could be a potential  
544 therapeutic target for ulcerative colitis. As future GWAS in large cohorts with detailed phenotyping,  
545 whole genome sequencing efforts, and novel association studies employing long read  
546 technologies to capture structural variants become available, we anticipate that this combined  
547 resource and framework will be of continued utility for the interpretation of molecular functions for  
548 noncoding genetic variants.

549  
550 The current study is still limited in several ways: firstly, we solely profiled the adult stage in an  
551 incomplete sampling of organ systems. While we utilized tissue from anatomic sites  
552 corresponding directly to existing biosamples in large-scale databases (Carithers et al., 2015;  
553 Stranger et al., 2017), the size and diversity of adult human organ systems make it difficult to  
554 representatively sample them in their entirety with current technologies. Additionally, our assay  
555 solely profiles chromatin accessibility in dissociated nuclei, and thus misses key orthogonal  
556 molecular and spatial information. Future assays that incorporate gene expression, chromatin  
557 accessibility, DNA methylation, chromosomal conformation, TF binding, and spatial information  
558 in the same single cell will greatly enhance our understanding of gene regulation in human cell  
559 types (Zhu et al., 2020). Notwithstanding these limitations, this atlas of >750,000 cCREs in almost  
560 half a million nuclei represents the largest cellular survey of cCREs across adult human organ  
561 systems to the best of our knowledge. This resource thus lays the foundation for the analysis of  
562 gene regulatory programs across human organ systems at cell type resolution, and accelerates  
563 the interpretation of noncoding sequence variants associated with complex human diseases and  
564 phenotypes. The datasets can be accessed and explored at <http://catlas.org/humantissue>.

565 **ACKNOWLEDGEMENTS**

566 We thank the ENCODE consortium, in particular Mike Pazin (NHGRI) and Idan Gadbank  
567 (Stanford), Kristin Ardlie (Broad Institute) and Ellen Gelfand (Broad Institute), for providing the  
568 tissue samples for the present study. We thank B. Li for bioinformatics support. We thank S. Kuan  
569 for sequencing libraries on the HiSeq4000. We thank B. Chen for valuable discussions and  
570 feedback. We thank the QB3 Macrolab at UC Berkeley for purification of the Tn5 transposase.  
571 This work was supported by the Ludwig Institute for Cancer Research (B.R.), and Foundation for  
572 the National Institutes of Health (K.J.G). J.D.H. was supported in part by a Ruth L. Kirschstein  
573 Institutional National Research Service Award T32 GM008666 from the National Institute of  
574 General Medical Sciences. Work at the Center for Epigenomics was supported in part by the UC  
575 San Diego School of Medicine.

576

577 **AUTHOR CONTRIBUTIONS**

578 Study was conceived by: J.D.H., S.P., A.W., and B.R. Study supervision: B.R. Supervision of data  
579 generation: S.P., A.W. and B.R. Contribution to data generation: J.D.H., X.H., M.M. Contribution  
580 to data analysis: K.Z., J.D.H., J.C., O.P. Y.E.L., Y.Q. Contribution to web portal: Y.E.L., K.Z.  
581 Contribution to data interpretation: K.Z., J.D.H., S.P., A.W., K.J.G. Contribution to writing the  
582 manuscript: K.Z., J.D.H., B.R. All authors edited and approved the manuscript.

583

584 **DECLARATION OF INTERESTS**

585 B.R. is a shareholder and consultant of Arima Genomics, Inc., and a co-founder of Epigenome  
586 Technologies, Inc. K.J.G is a consultant of Genentech, and shareholder in Vertex  
587 Pharmaceuticals. These relationships have been disclosed to and approved by the UCSD  
588 Independent Review Committee.

589 **FIGURES**

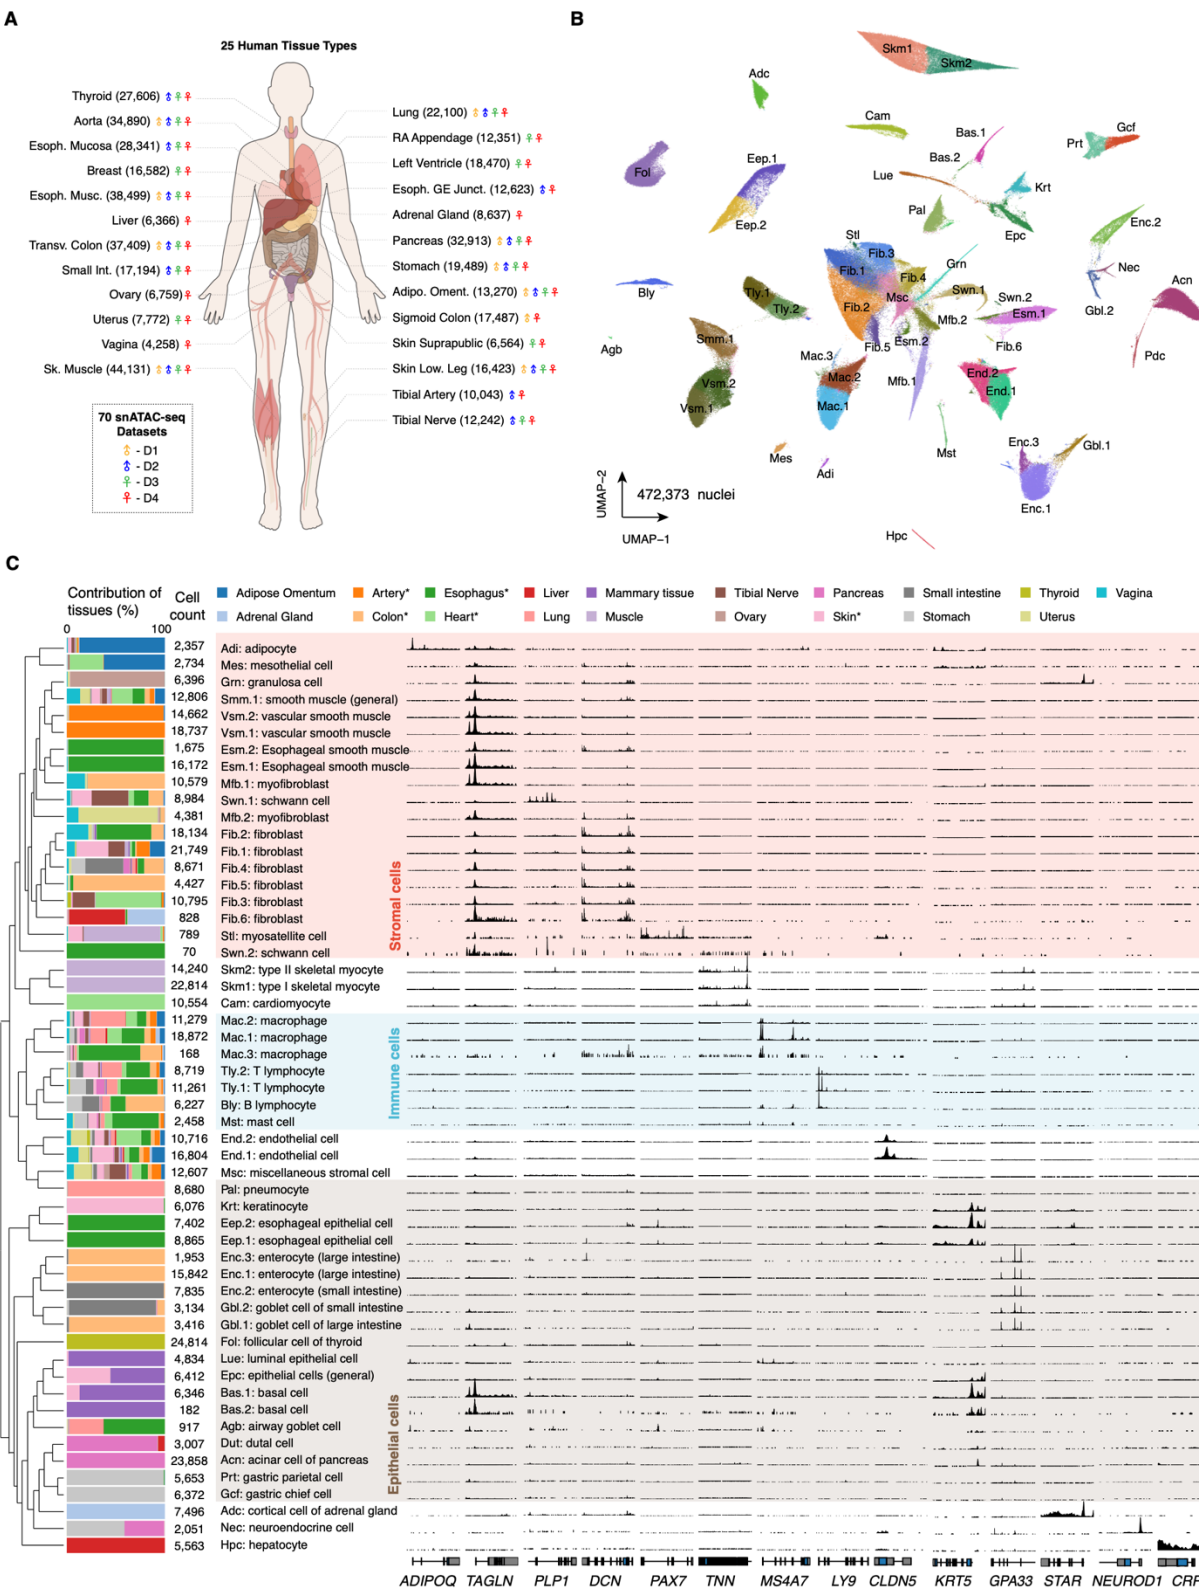

590

591 **Figure 1 | Single cell chromatin accessibility analysis of 25 adult human primary tissues.**

592 **A)** Overview of the study design. A total of 70 biosamples, representing 25 tissue types and  
593 obtained from up to four donors (D1 to D4), were used for sci-ATAC-seq assays. The number of  
594 nuclei profiled in each tissue was denoted in the parenthesis, along with the donor labels. **B)**  
595 Clustering of 472,373 nuclei identifying 54 distinct cell types. The visualization was generated  
596 using Uniform Manifold Approximation and Projection (UMAP) embedding. Clusters were  
597 annotated based on accessibility at promoters of marker genes as explained in the main text.  
598 Each dot in the scatter plot represents a nucleus. Nuclei are colored and labeled by cell type ID.  
599 The full names of the abbreviated cell type IDs are listed in panel **C**. **C)** Distribution of cell types  
600 across human tissues. The dendrogram on the left was created by hierarchical clustering of cell  
601 clusters based on chromatin accessibility. The bar chart represents relative contributions of  
602 tissues to cell clusters. \* indicates categories representing multiple samples originating from  
603 similar tissues. Genome browser tracks on the right show aggregate chromatin accessibility  
604 profiles for each cell cluster at selected marker gene loci which were used for annotation.  
605

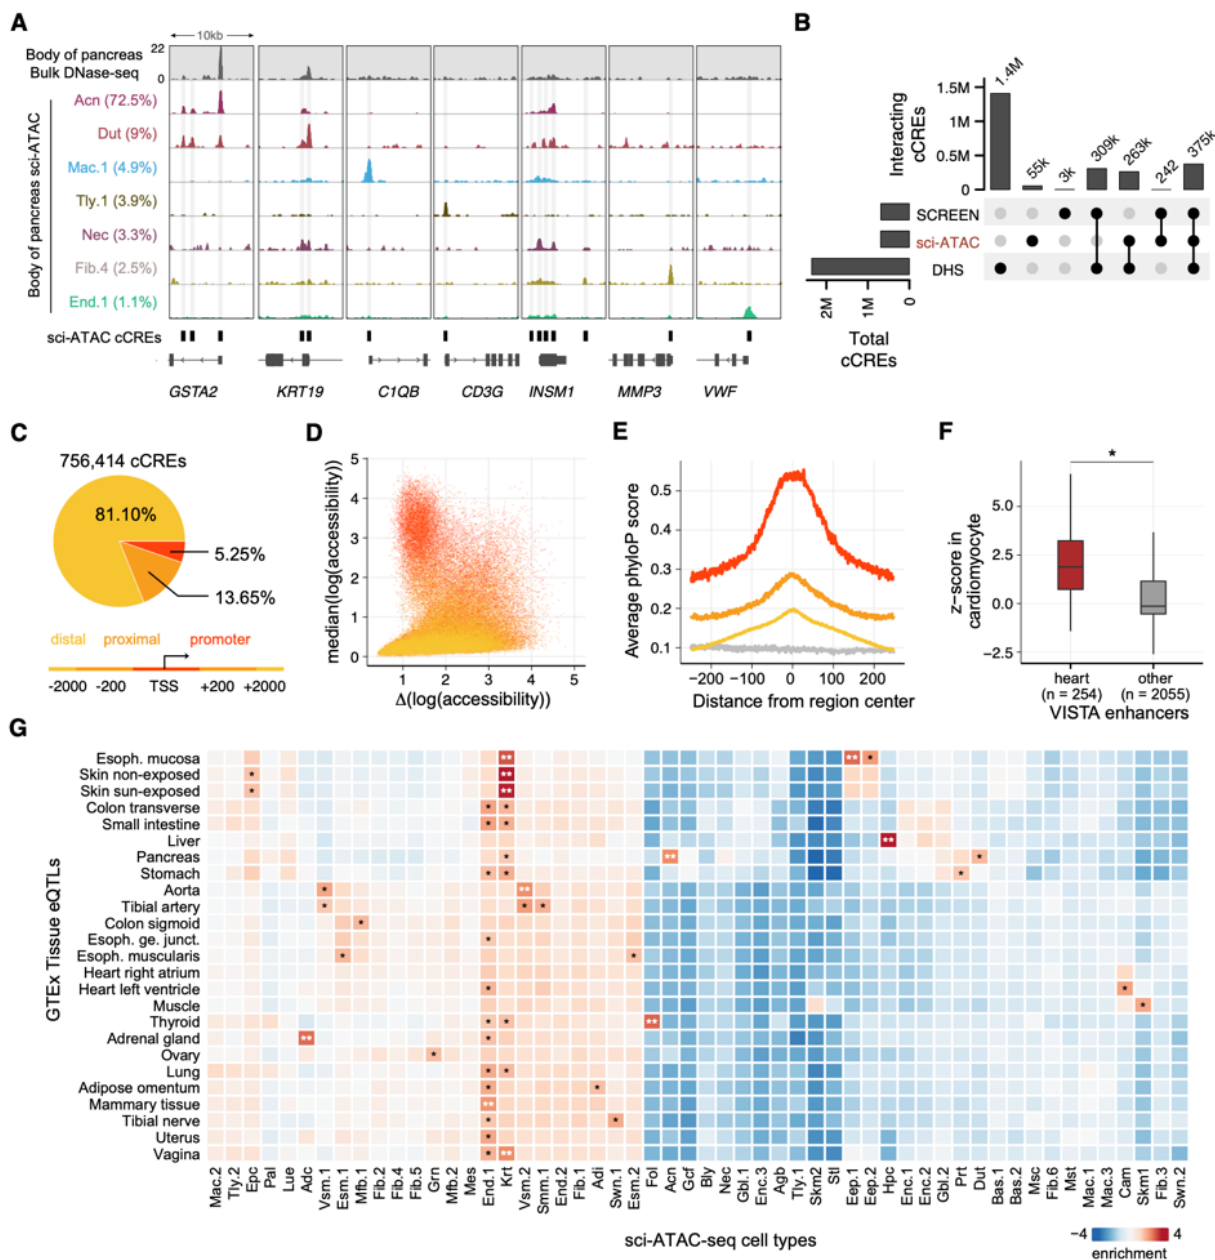

606  
 607 **Figure 2 | An atlas of cCREs in adult human cell types.** **A)** Genome browser tracks comparing  
 608 sci-ATAC-seq with bulk DNase-seq data from the ENCODE consortium (Accession:  
 609 ENCSR464TKV) for detecting accessible regions in body of pancreas as an example of a complex  
 610 heterogeneous tissue containing multiple cell types. **B)** Intersection between three cCRE  
 611 catalogues showing that the majority of identified cCREs in the present study are supported by  
 612 previous functional annotations released by the ENCODE consortium. **C)** Distribution of 756,414  
 613 cCREs across the human genome. Based on their distances to annotated gene transcription start  
 614 sites, we classified cCREs into one of the three groups: promoter, promoter-proximal and distal.

615 **D)** Scatter plot showing the three groups of cCREs based on median and range (difference  
616 between maximum and minimum) of chromatin accessibility across cell clusters. Each dot  
617 represents a cCRE, colored by groups in **C**. **E)** Average phyloP (Pollard et al., 2010) scores of  
618 cCREs stratified by groups defined in **c**. Genomic background is indicated in gray. **F)** Boxplot  
619 comparing validated heart-specific *in vivo* enhancers from VISTA database against other  
620 enhancers from VISTA database based on their chromatin accessibility in cardiomyocytes. **G)** Z-  
621 scores for enrichment of GTEX eQTLs from corresponding tissues in each cell cluster. \*:  $p < 0.05$ ,  
622 \*\*:  $p < 0.01$ .  
623

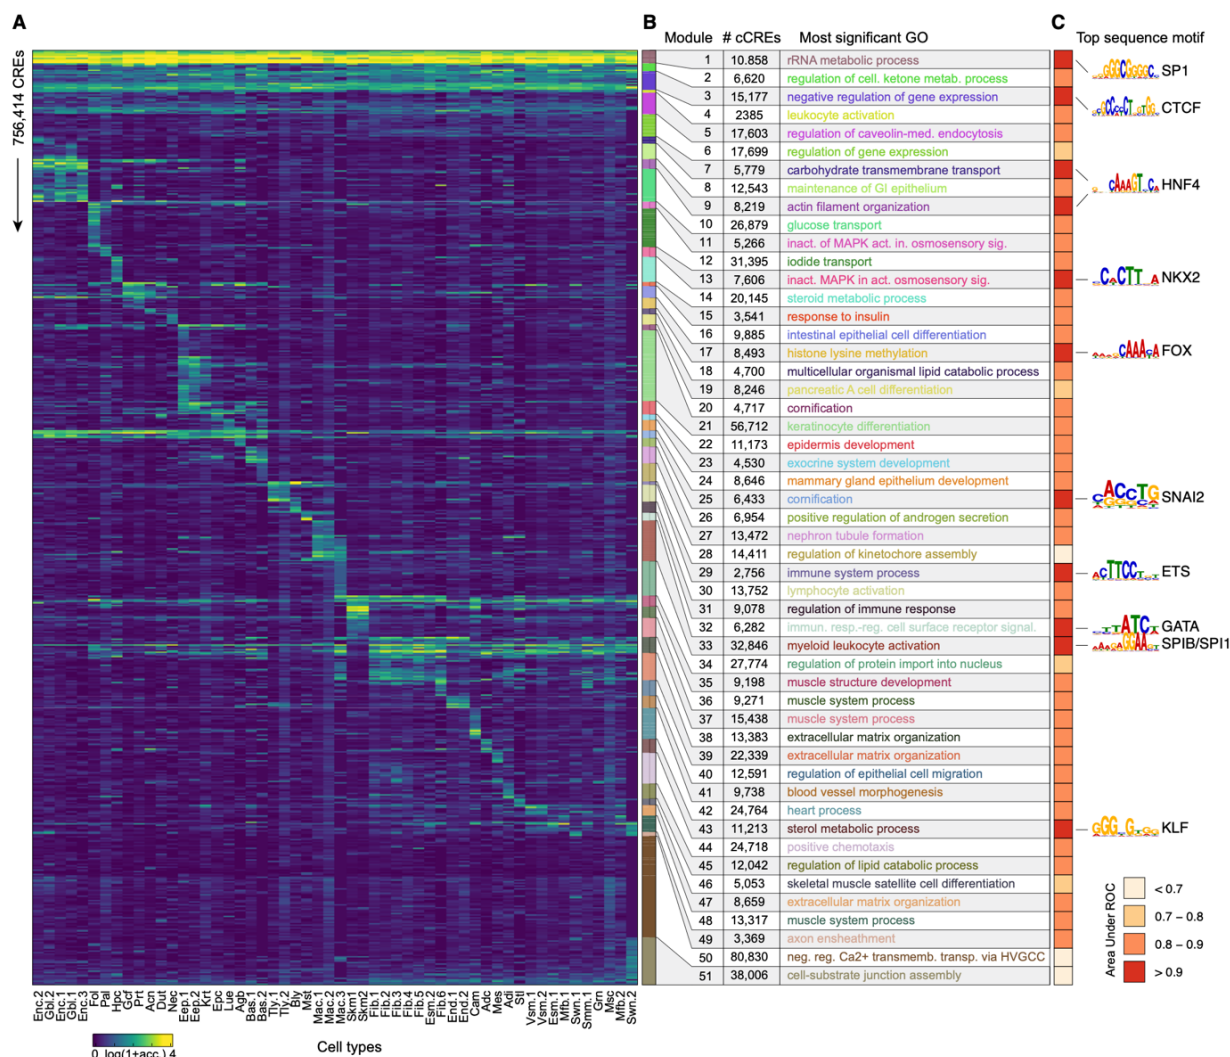

624  
 625 **Figure 3 | Delineation of cell-type specificity of human cCREs.** **A)** Heatmap representation of  
 626 chromatin accessibility for 756,414 cCREs across 54 human cell types. Each row represents an  
 627 individual cCRE, while each column represents a cell type. The cell type ID is the same as Figure  
 628 1C. Color represents relative chromatin accessibility. cCREs were organized into 51 modules by  
 629 clustering (see Methods). Color bars to the right depict the module ID. **B)** Top GREAT ontology  
 630 enrichment (significance level: FDR < 0.01) for each cCRE module. **C)** Heatmap representation  
 631 of area under the receiver operating characteristics (AUROC) across 51 cCRE modules. We  
 632 trained a 51-class convolutional neural network to predict the module class for each cCRE using  
 633 DNA sequences as the features (Figure S8). For each module the AUROC measures how well  
 634 the classifier distinguishes cCREs belonging to the target module from the rest. On the right of  
 635 the heatmap the top sequence motif features for the best performing modules are shown. Motifs



636 were extracted from the neural network model using the TF-MoDISco algorithm (Shrikumar et al.,  
637 2018).  
638

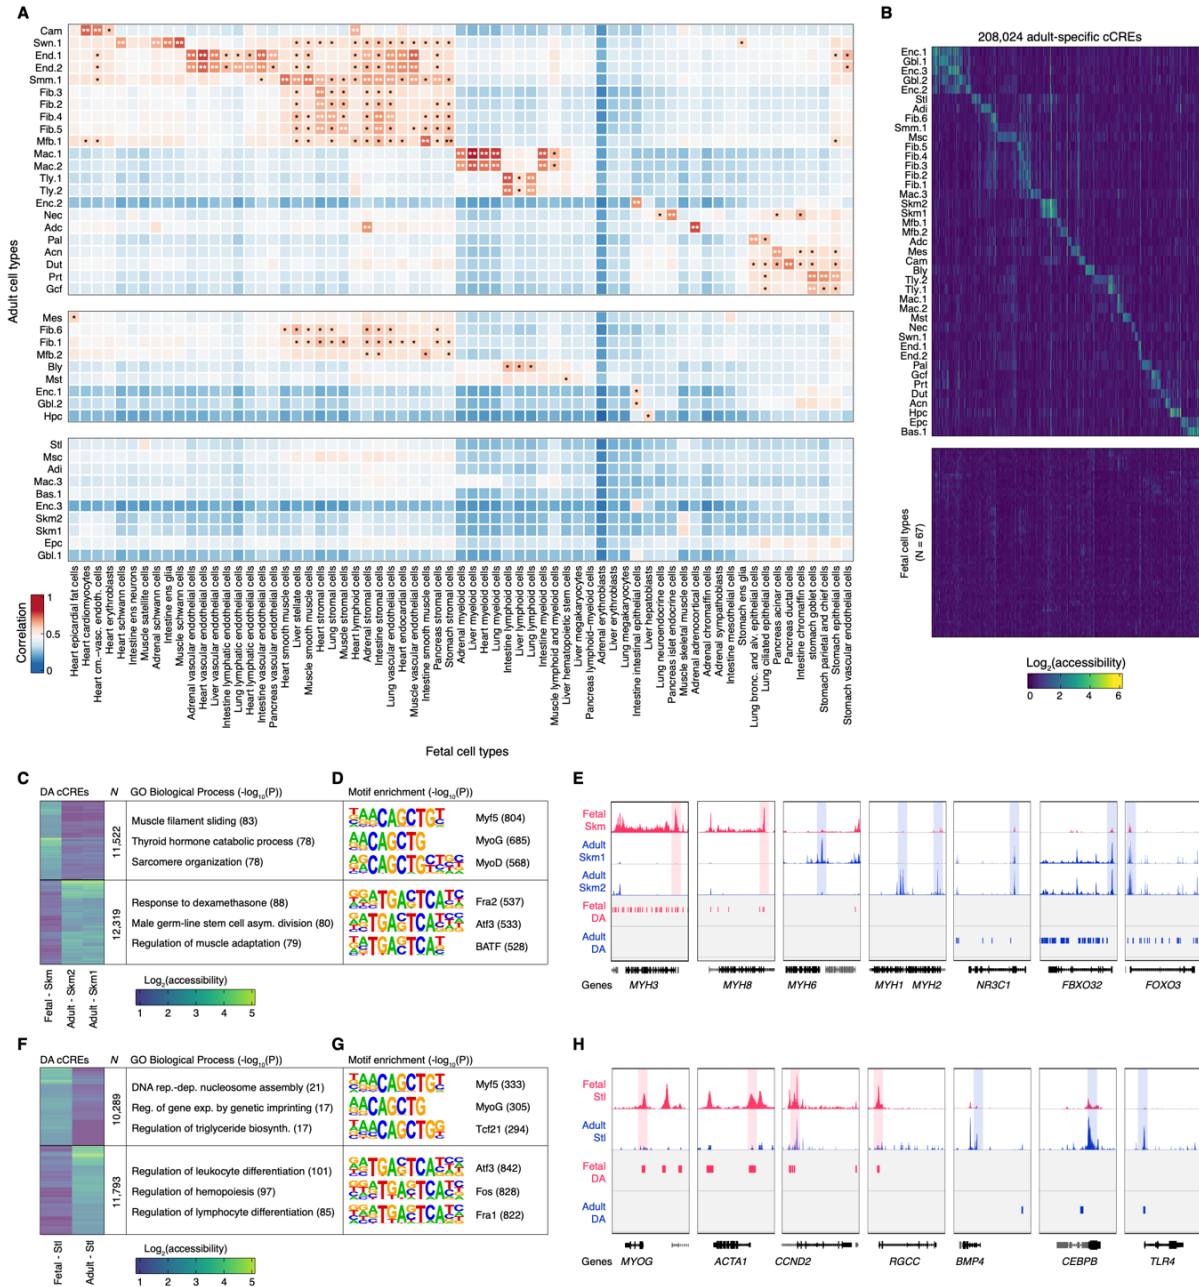

639

640 Figure 4 | **Comparison of chromatin accessibility between fetal and adult stages. A)**

641 Heatmap showing similarity between fetal (column) and adult (row) cell types in matching tissues.

642 Color represents Pearson correlation coefficient. \*: p < 0.05, \*\*: p < 0.01. **B)** Heatmap

643 representation of 208,024 adult-specific cCREs. Color represents log-transformed normalized

644 signal. **C)** Heatmap representation of 23,841 differentially accessible (DA) cCREs for fetal

645 skeletal myocytes and adult skeletal myocytes along with the top three GREAT biological process

646 ontology enrichments (McLean et al., 2010) for adult and fetal skeletal myocyte DA cCREs. Color

647 represents log-transformed normalized signal. **D)** Top three known TF motifs enriched within fetal

648 and adult skeletal myocyte DA cCREs identified by HOMER (Heinz et al., 2010). **E)** Genome  
649 browser tracks showing chromatin accessibility for fetal and adult skeletal myocytes along with  
650 DA cCREs between the adult and fetal skeletal myocytes. Indicated genes are shown in black,  
651 other genes are shown in gray. Transcription start sites of the indicated genes are shaded in red  
652 and blue. **F-H** represent the same analyses performed in **C-D** for 22,082 DA cCREs between fetal  
653 satellite cells and adult satellite cells.  
654

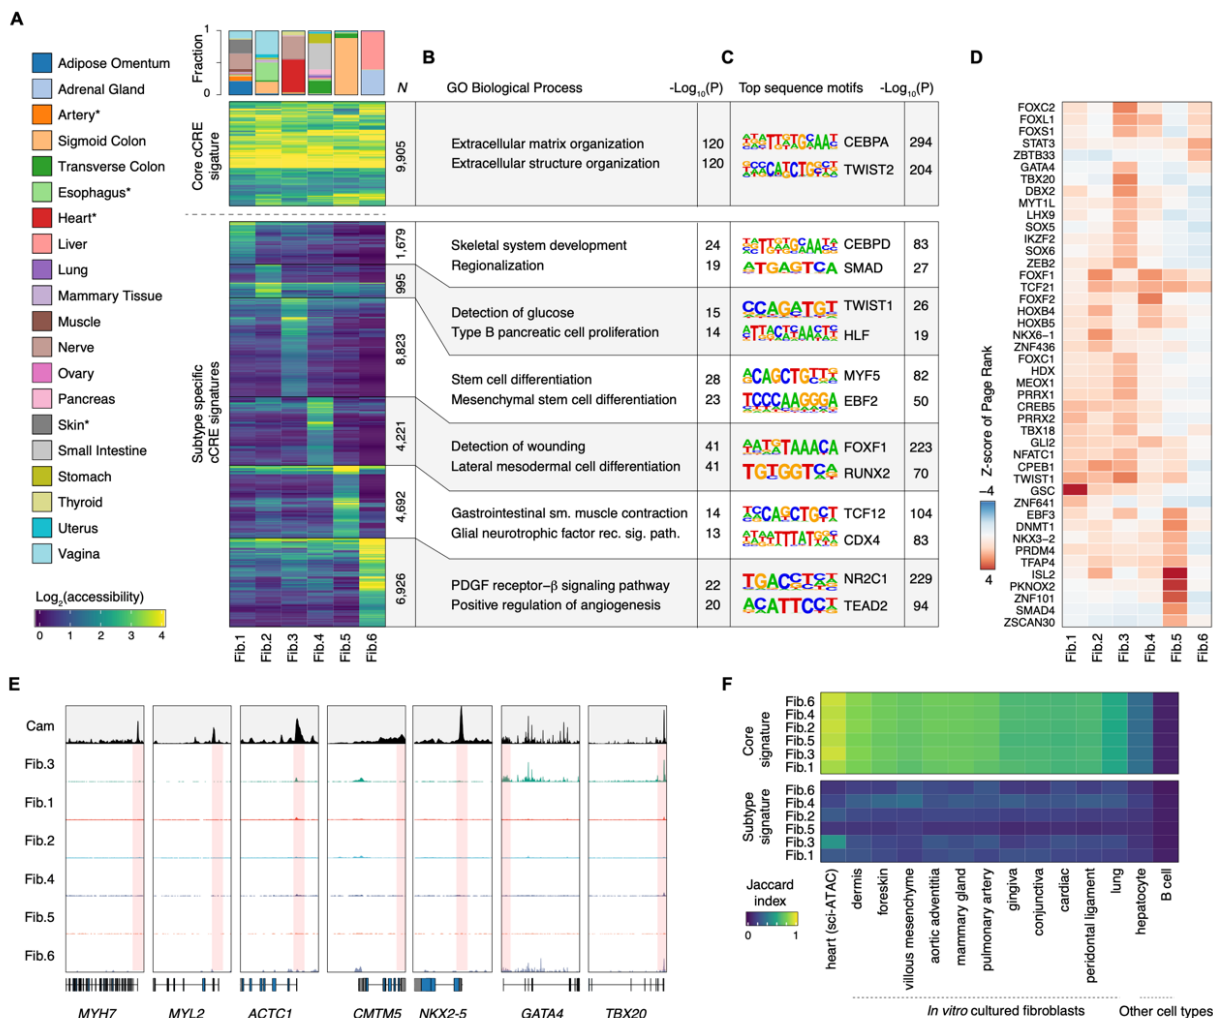

655  
 656 **Figure 5 | Chromatin features of fibroblasts in different tissue environments.** **A)** Heatmap  
 657 representation of core fibroblast cCREs and fibroblast subtype-specific elements. Color  
 658 represents  $\log_2(\text{accessibility})$ . Bar plot on the top indicates tissues of origin by percentage for each  
 659 fibroblast subtype. **B)** Top GREAT ontology enrichments (McLean et al., 2010) for core fibroblast  
 660 and fibroblast subtype-specific cCREs. **C)** *De novo* sequence motifs and their matched known TF  
 661 motifs identified by HOMER (Heinz et al., 2010). **D)** Similarity indices between (top) core fibroblast  
 662 cCREs and (bottom) subtype-specific cCREs with *in vivo* cardiac fibroblasts from sci-ATAC-seq  
 663 (Hocker et al., 2020), *in vitro* cultured fibroblast DNase-seq datasets, and non-fibroblast DNase-  
 664 seq datasets. **E)** Heatmap representation showing key TFs (row) in each fibroblast subtype  
 665 (column) revealed using transcription regulatory network analysis. Color represents standardized  
 666 PageRank scores. **F)** Genome browser tracks for cardiomyocytes (Cam) and fibroblast subtypes  
 667 (Fib.1-Fib.6) from sci-ATAC-seq at several cardiomyocyte marker genes.  
 668

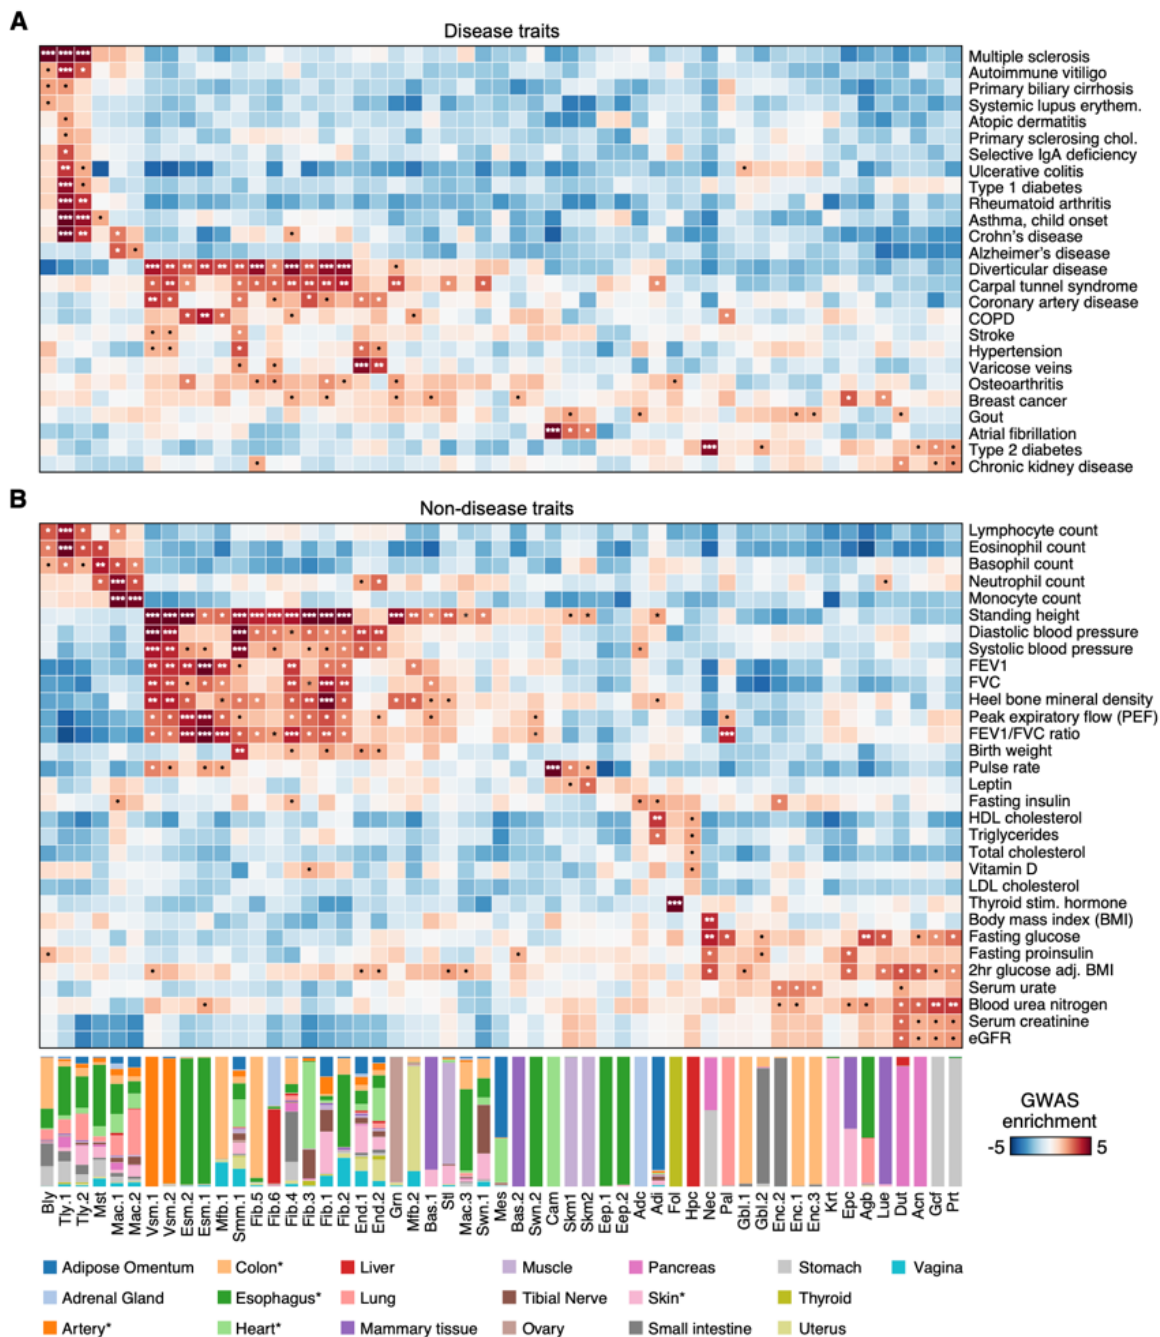

669  
 670 **Figure 6 | Association of human cell types with risk variants for complex traits and**  
 671 **diseases.** Heatmap showing enrichment of risk variants associated with disease (**A**) and  
 672 non-disease traits (**B**) from genome wide association studies in human cell type-resolved cCREs. Cell  
 673 type-stratified linkage disequilibrium score regression (LDSC) analysis was performed using  
 674 GWAS summary statistics for 56 phenotypes. Total cCREs identified independently from each  
 675 cell type were used as input for analysis. Z-scores for enrichment are displayed and were used  
 676 to compute one-sided p-values for enrichments. P-values were corrected using the Benjamini

677 Hochberg procedure for multiple tests (\*: FDR < 0.1; \*\*: FDR < 0.01; \*\*\*: FDR < 0.001; •: nominal  
678 p-value < 0.05). Bar plot on the bottom shows the tissue contributions for each cell cluster. \*  
679 indicates categories representing multiple samples that originated from similar tissues.  
680

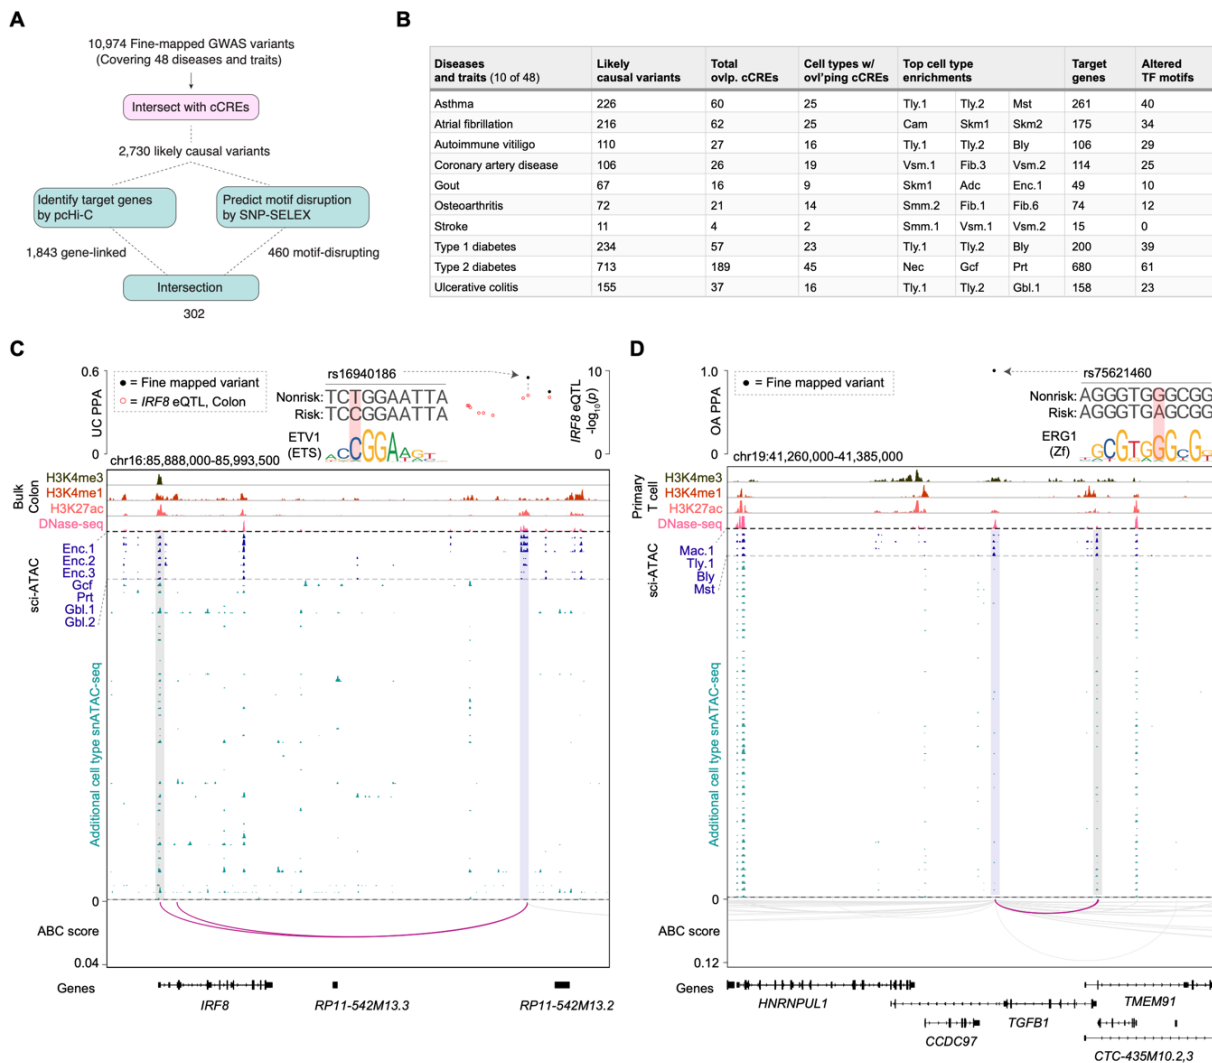

681  
 682 **Figure 7 | Systematic interpretation of molecular functions for non-coding risk variants. A)**  
 683 Schematic illustrating the workflow for annotating fine-mapped non-coding risk variants. We  
 684 started with 10,974 likely causal fine-mapped variants (with a posterior probability of association  
 685 – PPA – greater than 0.1) spanning 48 diseases or complex traits. 2,730 likely causal variants  
 686 were found to overlap with human cell type cCREs defined in the present study. For each of these  
 687 variants, we searched for target genes using promoter capture HiC data and identified disrupted  
 688 TF motifs using 94 deltaSVM models trained using recent SNP-SELEX experiments (Yan et al.,  
 689 2021). Finally, 302 likely causal variants were annotated with a full complement of information  
 690 (overlapping cell type cCRE, putative target gene, and altered TF motif). **B)** Table showing for 10  
 691 examples out of 48 total fine-mapped diseases and traits: number of likely causal variants (PPA  
 692 > 0.1), number of cCREs overlapping likely causal variants, number of cell types in which  
 693 overlapping cCREs are accessible, top cell types variants are enriched in based on LD score

694 regression (Bulik-Sullivan et al., 2015), number of predicted target genes for likely causal variants,  
695 and significantly altered motifs predicted by deltaSVM model trained using SNP-SELEX data.  
696 Comprehensive data are provided in Table S10. **C,D**) Fine mapping and molecular  
697 characterization of an ulcerative colitis (UC) risk variant (**C**) in a gastrointestinal (GI) epithelial cell  
698 cCRE (Enc = enterocyte, Gcf = gastric chief cell, Prt = parietal cell, Gbl = goblet cell) and an  
699 osteoarthritis variant (**D**) in an immune cell cCRE (Mac = macrophage, Tly = T lymphocyte, Bly =  
700 B lymphocyte, Mst = Mast cell). Genome browser tracks (GRCh38) display histone modification  
701 ChIP-seq and DNase-seq from public human transverse colon datasets (**C**) and human primary  
702 T cell datasets (**D**) from ENCODE (see Methods) as well as chromatin accessibility profiles for  
703 human cell types from sci-ATAC-seq. Chromatin interaction tracks show linkages between the  
704 variant-containing cCREs and genes from promoter capture HiC data via Activity-by-Contact  
705 (ABC) (Fulco et al., 2019) analysis. All linkages shown have an ABC score > 0.02. PPA: Posterior  
706 probability of association.  
707



708 **SUPPLEMENTAL FIGURES**

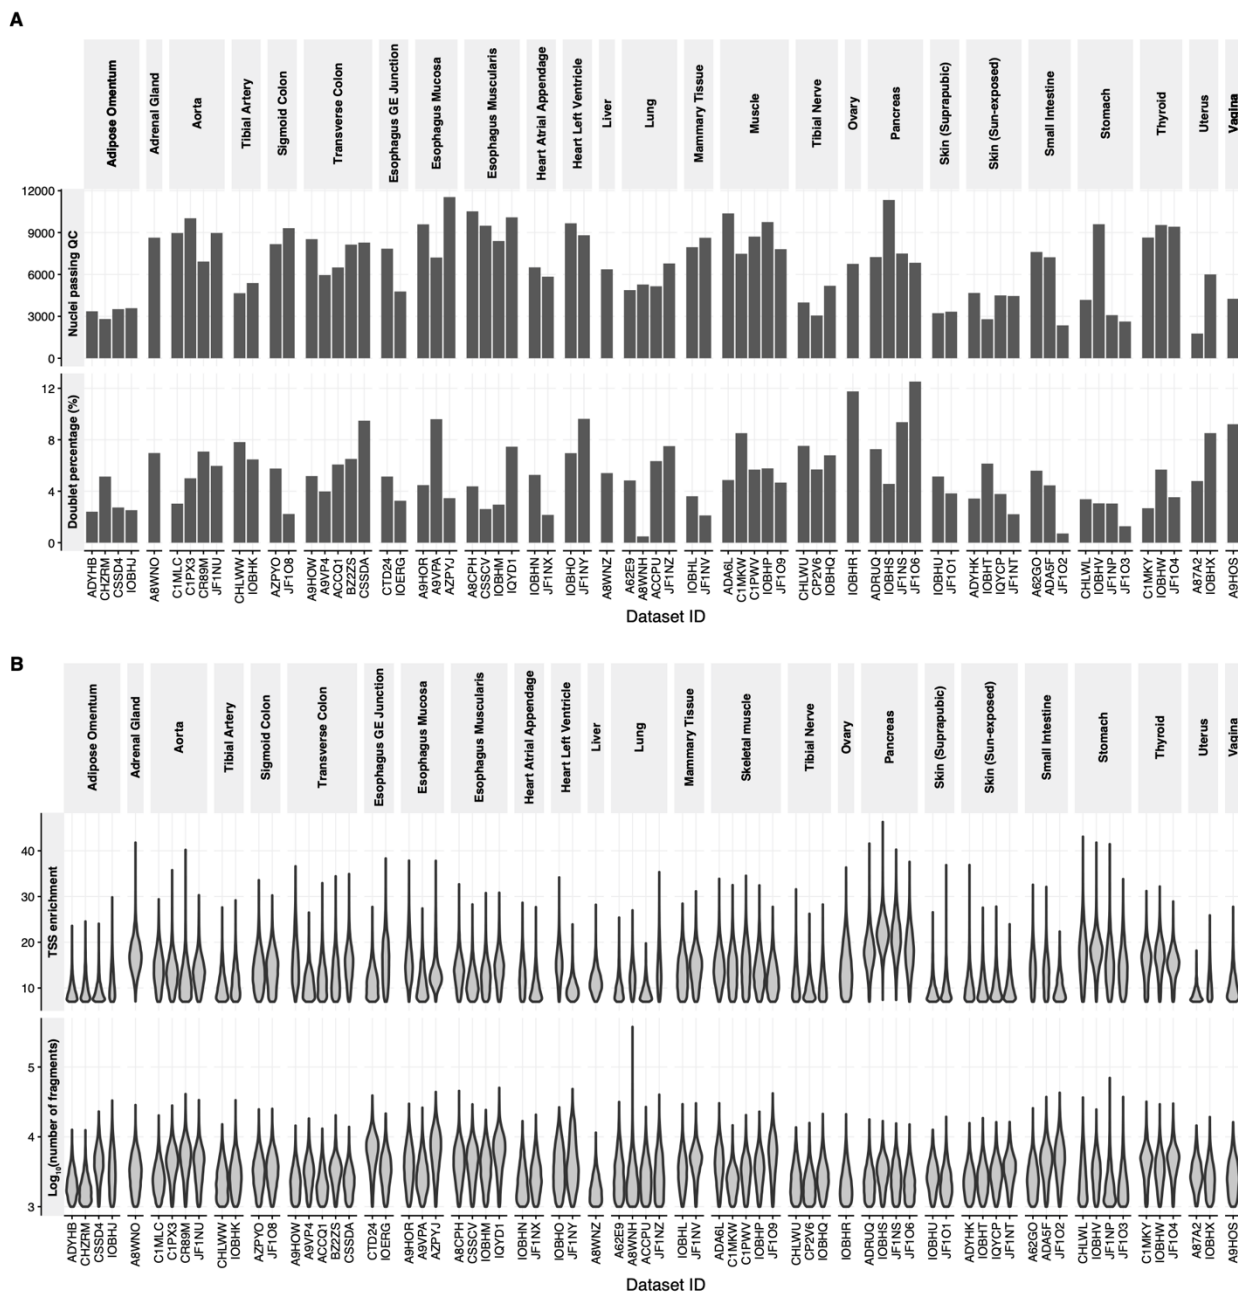

709  
 710 Supplemental Figure 1 | **Quality control for sci-ATAC-seq datasets.** **A)** Upper bar plot shows  
 711 the number of nuclei that passed quality control in each experiment. Nuclei were first filtered by  
 712 stringent quality control criteria (TSS enrichment greater than 7 and number of mapped fragments  
 713 greater than 1000 per nucleus) and then subjected to doublet removal. Lower bar plot bottom  
 714 shows the percentage of doublets detected in each dataset. **B)** Upper violin plot shows the  
 715 distribution of TSS enrichments for nuclei that passed quality control in each experiment. Lower

716 violin plot shows the distribution of number of fragments for nuclei that passed quality control in  
717 each dataset.  
718

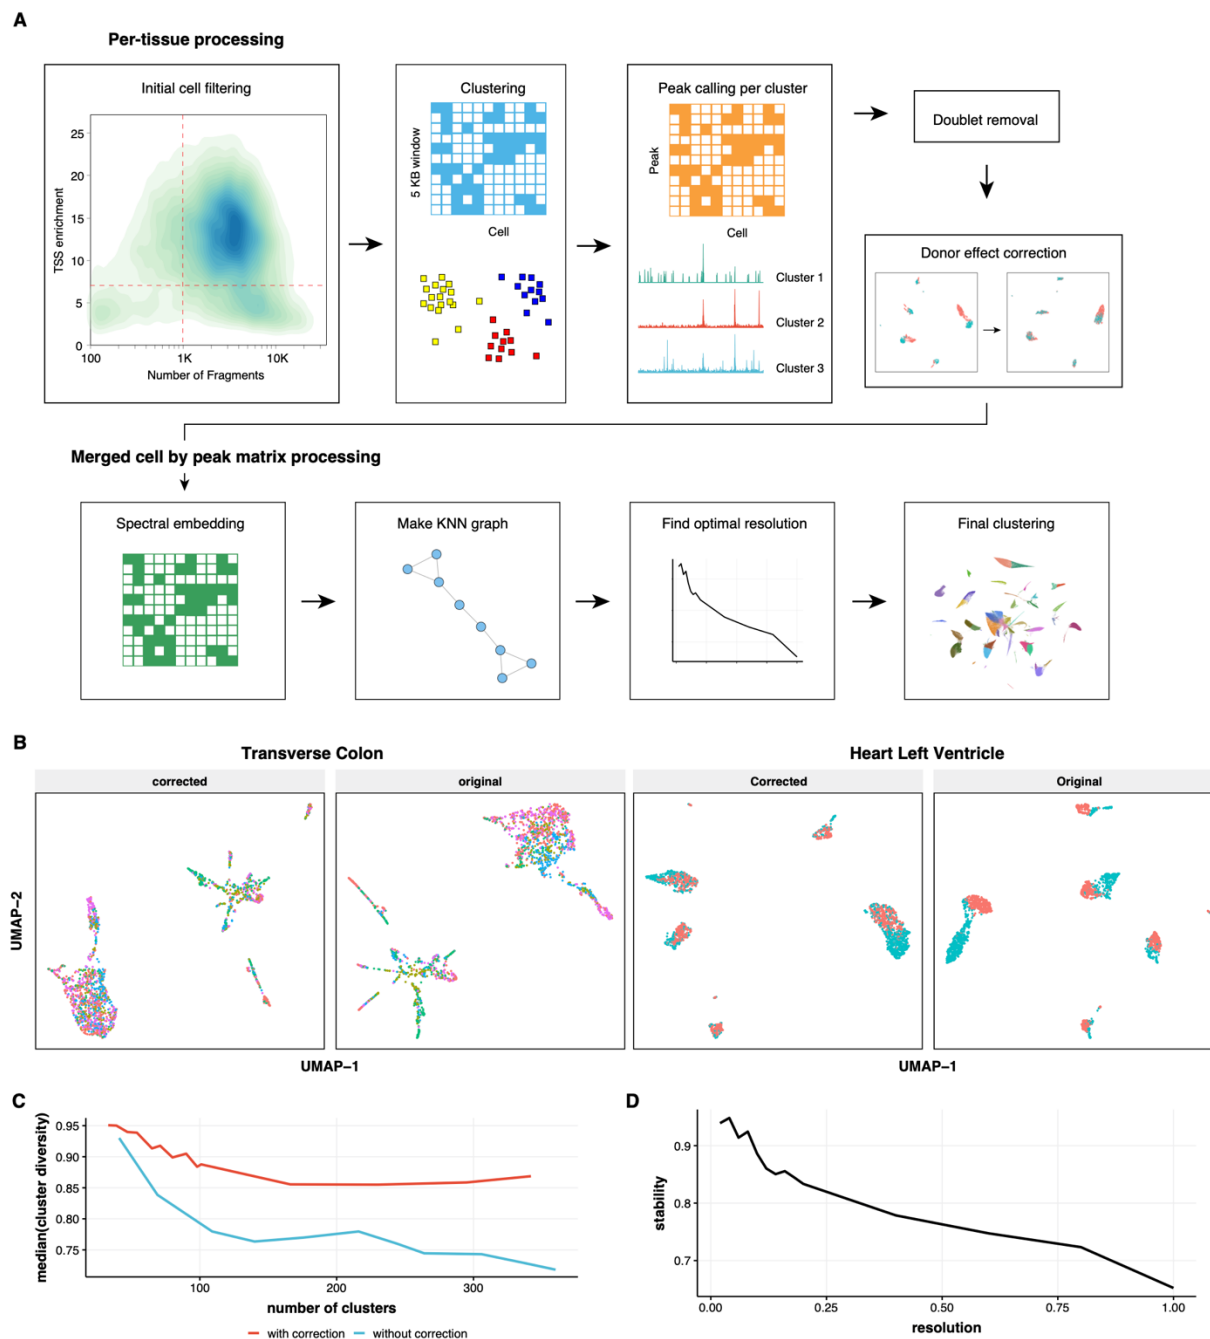

719  
 720 Supplemental Figure 2 | **Computational framework for analyzing sci-ATAC-seq data.** **A)**  
 721 Schematic illustrating the workflow of the analysis pipeline. **B)** Scatter plots showing the UMAP  
 722 embedding of nuclei before and after batch correction. Dots with the same color are coming from  
 723 the same donor or batch. **C)** Line plot showing the median of cluster diversity as a function of  
 724 number of identified clusters in the dataset stratified by batch correction operation. To compute  
 725 the cluster diversity, we first grouped the cells based on their tissue of origin and then based on  
 726 the experimental batch. We counted the cells for each combination and normalized by the total

727 number of cells of the corresponding sample. For each tissue, normalized entropy was computed  
728 across batches. The average entropy across all tissues in the cluster were taken as the cluster  
729 diversity. **D)** Line plot showing the stability of clustering results as a function of resolution  
730 parameter in the Leiden algorithm. To compute the stability under a particular resolution, five  
731 perturbations were conducted on the kNN graph. During each perturbation 2% of the edges were  
732 randomly selected and subject to removal. The clustering was performed on the perturbed graph  
733 and the average Adjusted Rand Index (ARI) between different runs were taken as the stability.  
734

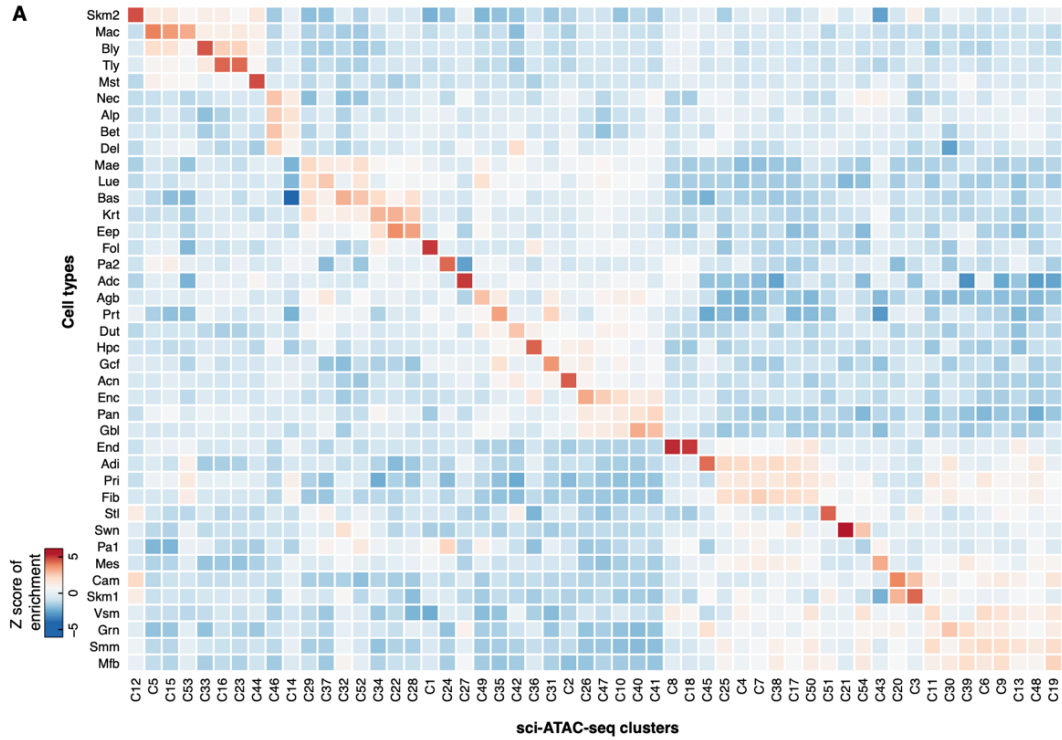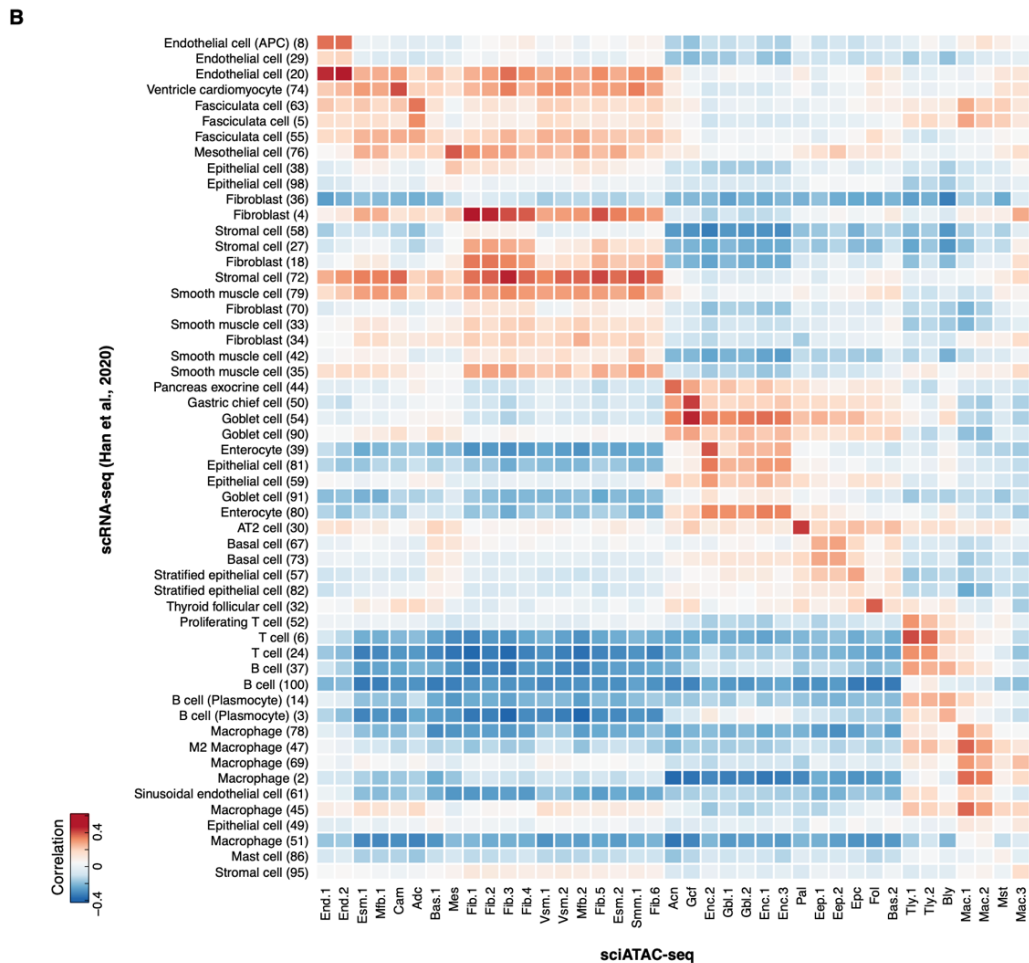

736 Supplemental Figure 3 | **Evidence supporting the annotation of 54 cell clusters. A)** Heatmap  
737 representation showing the marker gene enrichment of cell types. The marker genes were  
738 downloaded from the PanglaoDB (Franzén et al., 2019). **B)** Heatmap representation showing the  
739 pairwise similarity between 39 sci-ATAC-seq cell types (column) and corresponding scRNA-seq  
740 cell types (row). Color represents the Pearson correlation coefficient of expression level of 500  
741 most variable genes. Promoter accessibility was used to estimate the gene expression level in  
742 sci-ATAC-seq.  
743

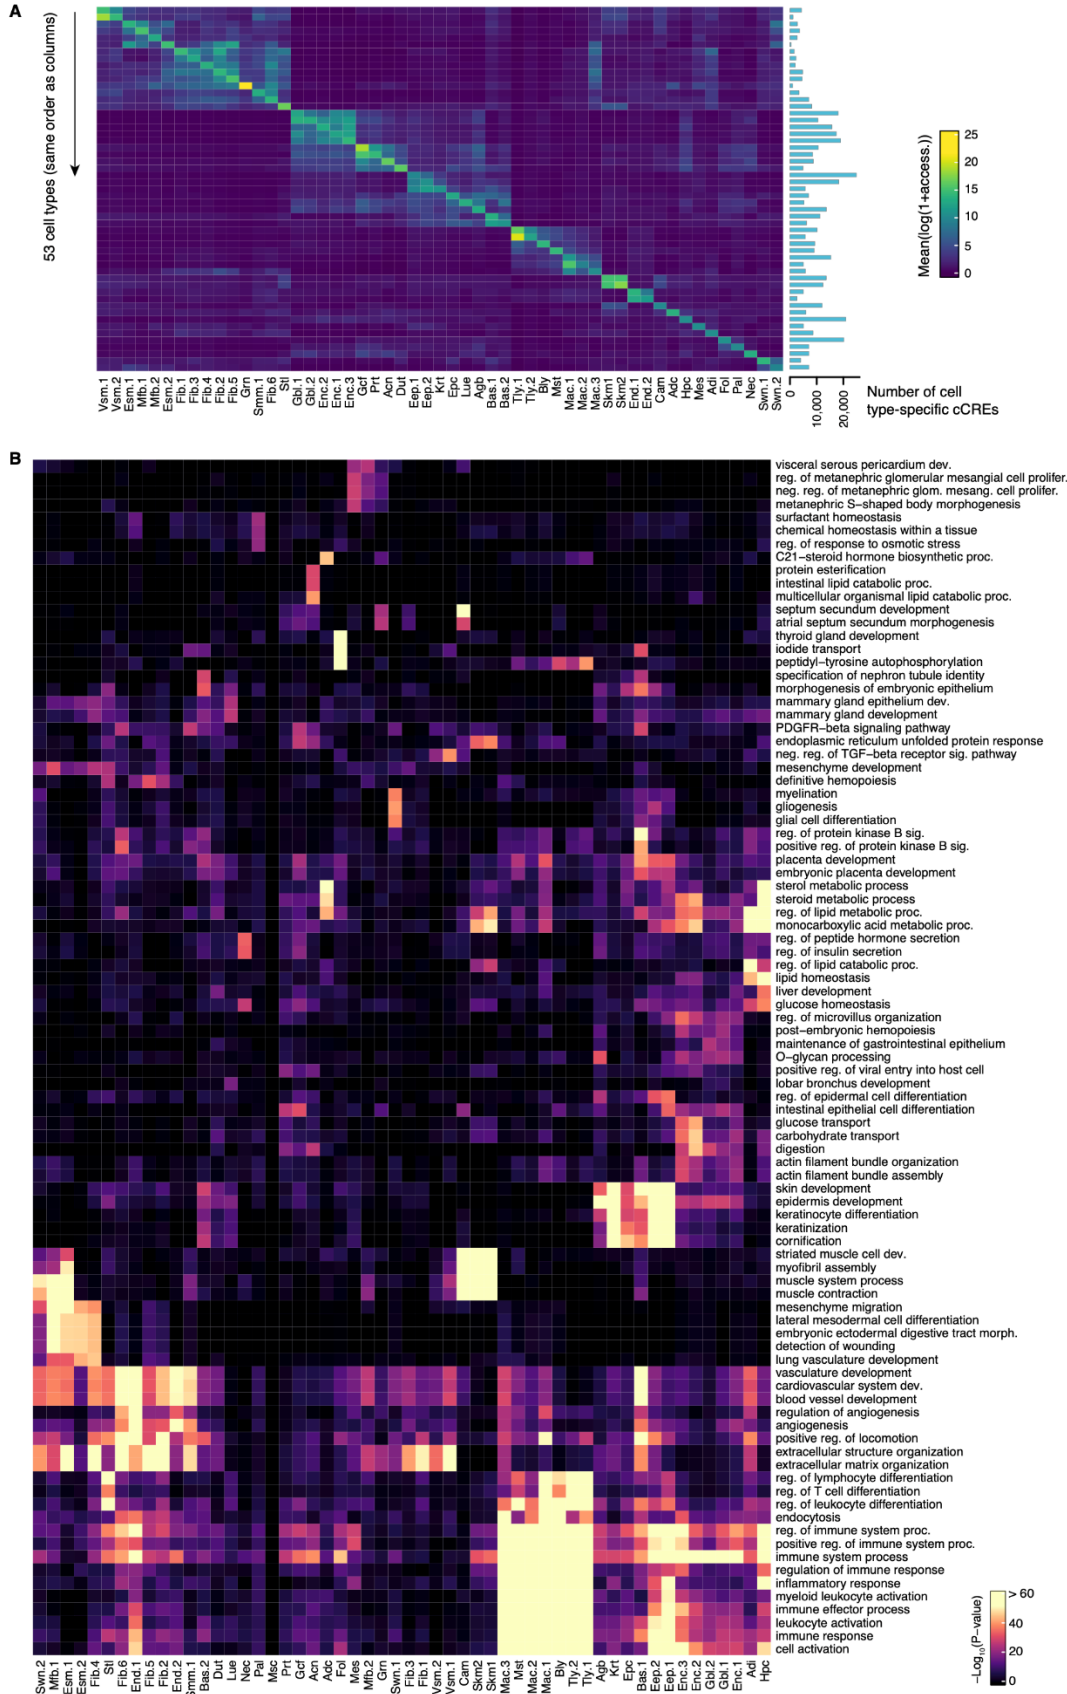

745 Supplemental Figure 4 | **Characterization of cell-type-restricted cCREs in 53 out of 54 sci-**  
746 **ATAC-seq cell types. A)** Chromatin accessibility at cell type-specific cCREs. Color represents  
747 the average  $\log_2(\text{accessibility})$  of the cell-type-restricted cCREs in a particular cell type. Each row  
748 represents the aggregated profile of cell-type-restricted cCREs. Bar plot on the right shows the  
749 number of cell type-specific cCREs for each cell type. **B)** Heatmap representation showing the  
750 gene ontology term (column) enrichment for each set of cell-type-restricted cCREs (row). The  
751 enrichment analysis was performed using GREAT (McLean et al., 2010) under default settings.  
752 Color represents the negative logarithm of P-value of enrichment.  
753



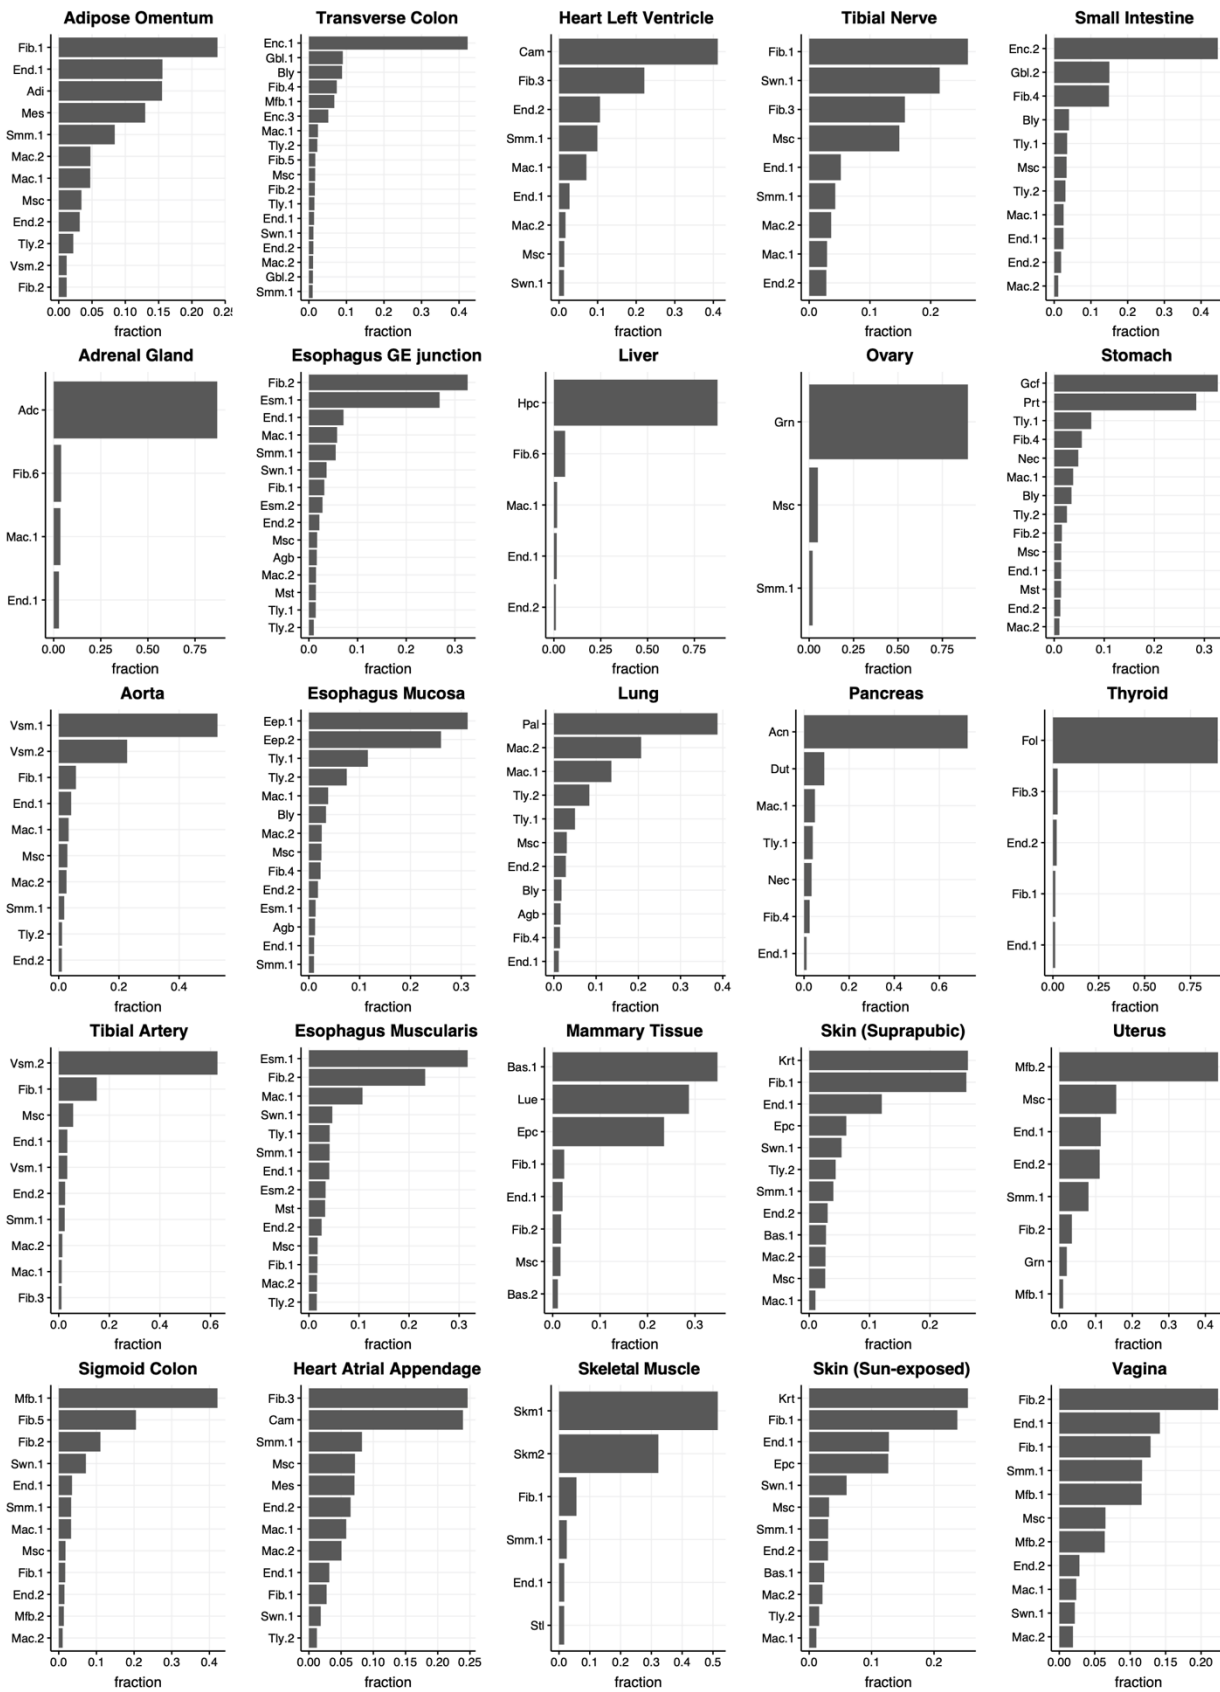

755 Supplemental Figure 5 | **Bar plots showing cell-type composition for 25 tissue types.**  
756

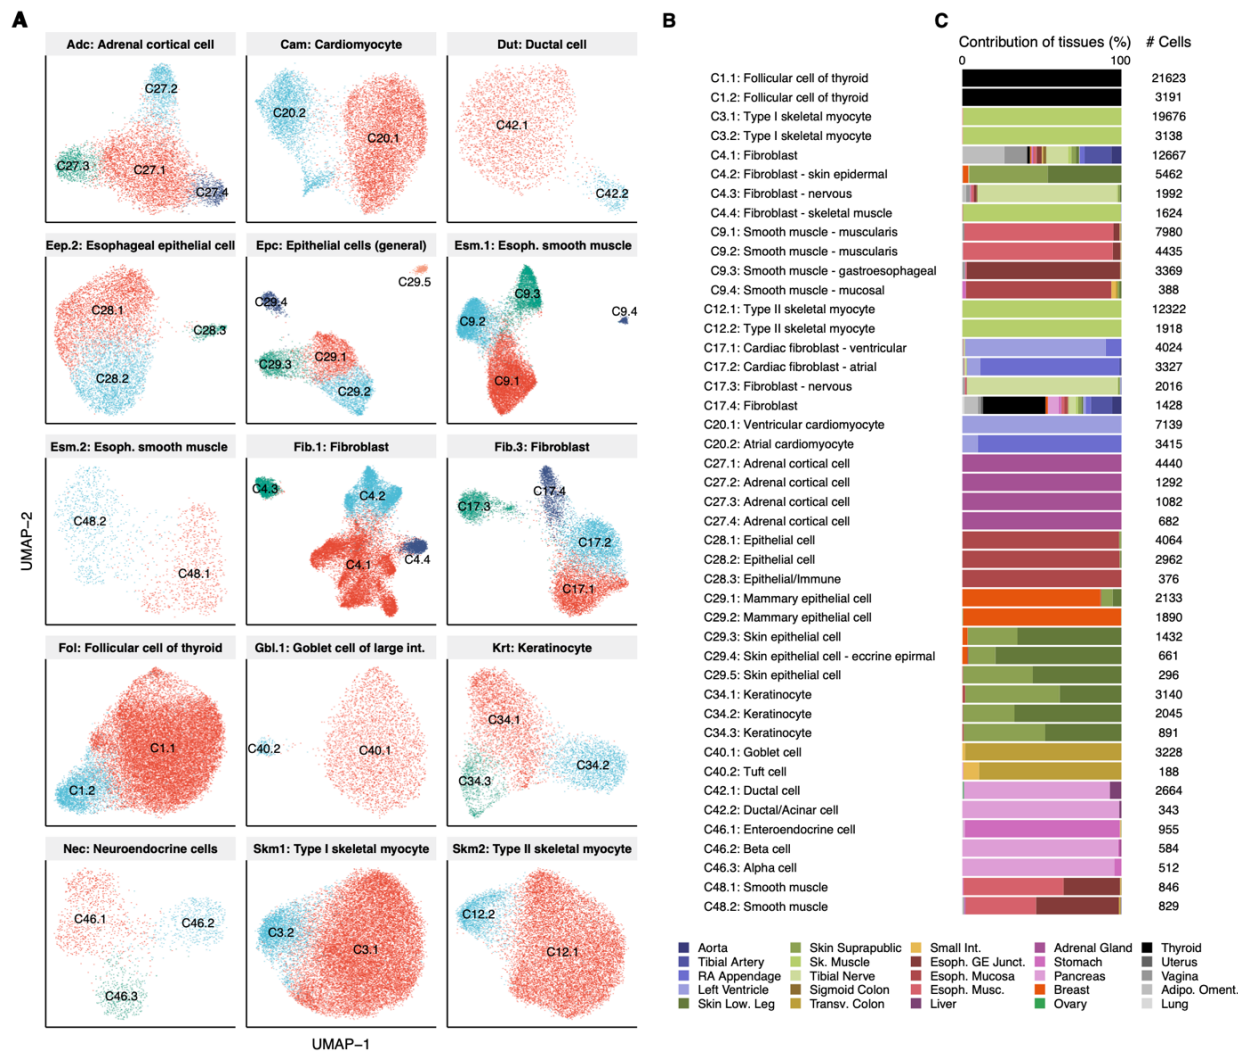

757  
 758 Supplemental Figure 6 | **Focused clustering analysis reveals heterogeneity in primary cell**  
 759 **clusters. A)** UMAP embedding of cells from 15 primary cell clusters that contain more than one  
 760 subcluster during focused clustering analysis. **B)** Cell type annotation of 44 subclusters based on  
 761 chromatin accessibility at marker genes. **C)** Bar chart showing relative contributions of tissues to  
 762 44 subclusters.  
 763

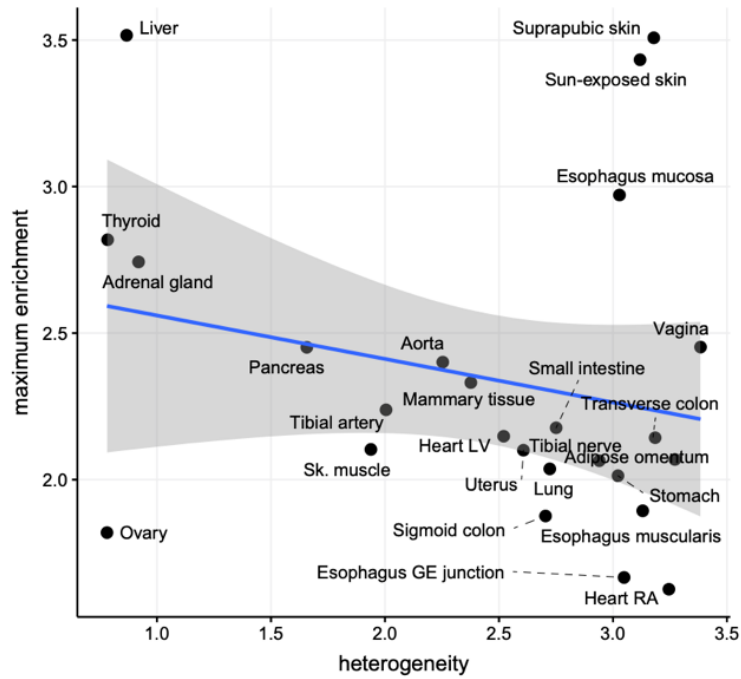

764

765 Supplemental Figure 7 | **Scatter plot showing the maximum chromatin accessibility**  
766 **enrichment of GTEx tissue eQTLs as a function of cellular heterogeneity.** The chromatin  
767 accessibility enrichment of GTEx tissue eQTLs in each tissue was computed as described in  
768 Method, and the maximum value across the 25 tissue types was used for the plot.

769

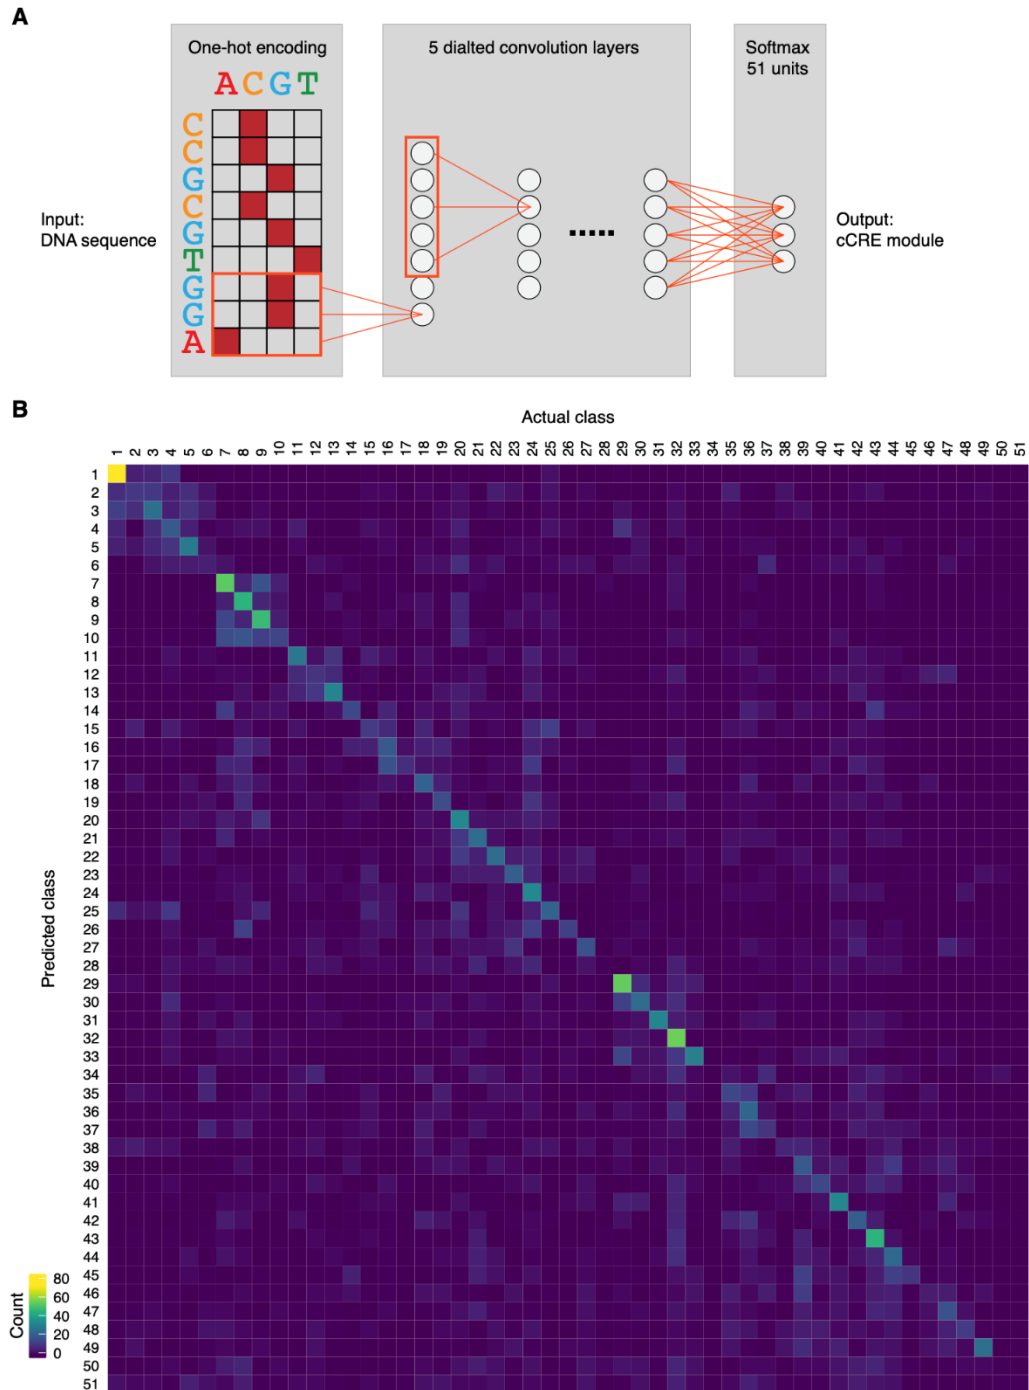

770

771 Supplemental Figure 8 | **Convolutional neural network identifies sequence determinants of**

772 **regulatory modules.** **A)** Schematic illustrating the architecture of a 51-class neural network

773 consisting of 5 dilated convolutional neural network layers. **B)** Heatmap representation of the

774 confusion matrix. Each row of the matrix represents the instances in a predicted class while each

775 column represents the instances in an actual class. Color represents the number of CREs.

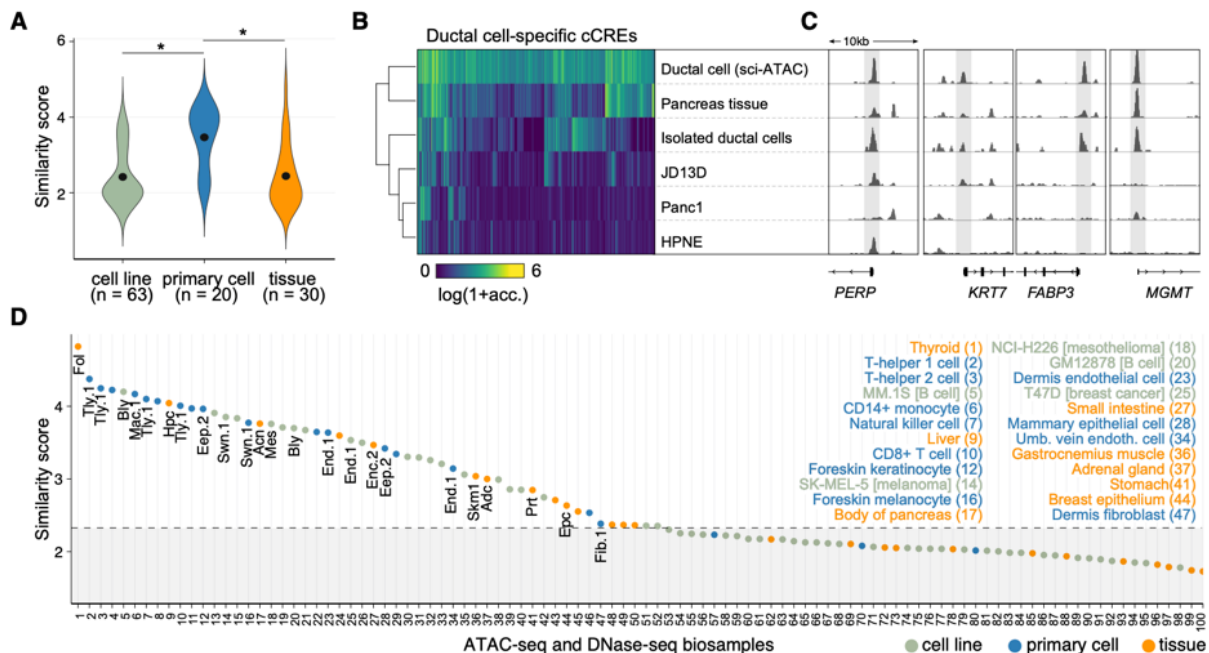

777  
 778 Supplemental Figure 9 | **Comparison of open chromatin landscapes in adult human cell**  
 779 **types with previous DNase-seq data obtained from bulk biosamples.** **A)** Distribution of  
 780 similarity scores for 113 bulk DNase-seq samples stratified by sample classification. Similarity  
 781 score is defined as the maximum of the standardized correlation scores of a bulk DNase-seq  
 782 sample with 54 adult human cell types from sci-ATAC-seq. \* indicates P value < 0.01. Green color  
 783 denotes data from cell lines, blue color denotes data from primary cells, and orange color denotes  
 784 data from bulk tissues. **B)** Heatmap representation of chromatin accessibility at ductal cell-  
 785 specific cCREs identified by sci-ATAC-seq across ductal cell-related sci-ATAC-seq, primary cell,  
 786 tissue, and immortal cell line biosamples. **C)** genome browser tracks showing chromatin  
 787 accessibility profiles around ductal cell marker genes (*PERP* and *KRT7*) or tumor repressors  
 788 (*FABP3* and *MGMT*). **D)** Top similarity scores by rank shown for 100 bulk biosamples &  
 789 corresponding best match cell types. Sample classification is indicated by color.  
 790

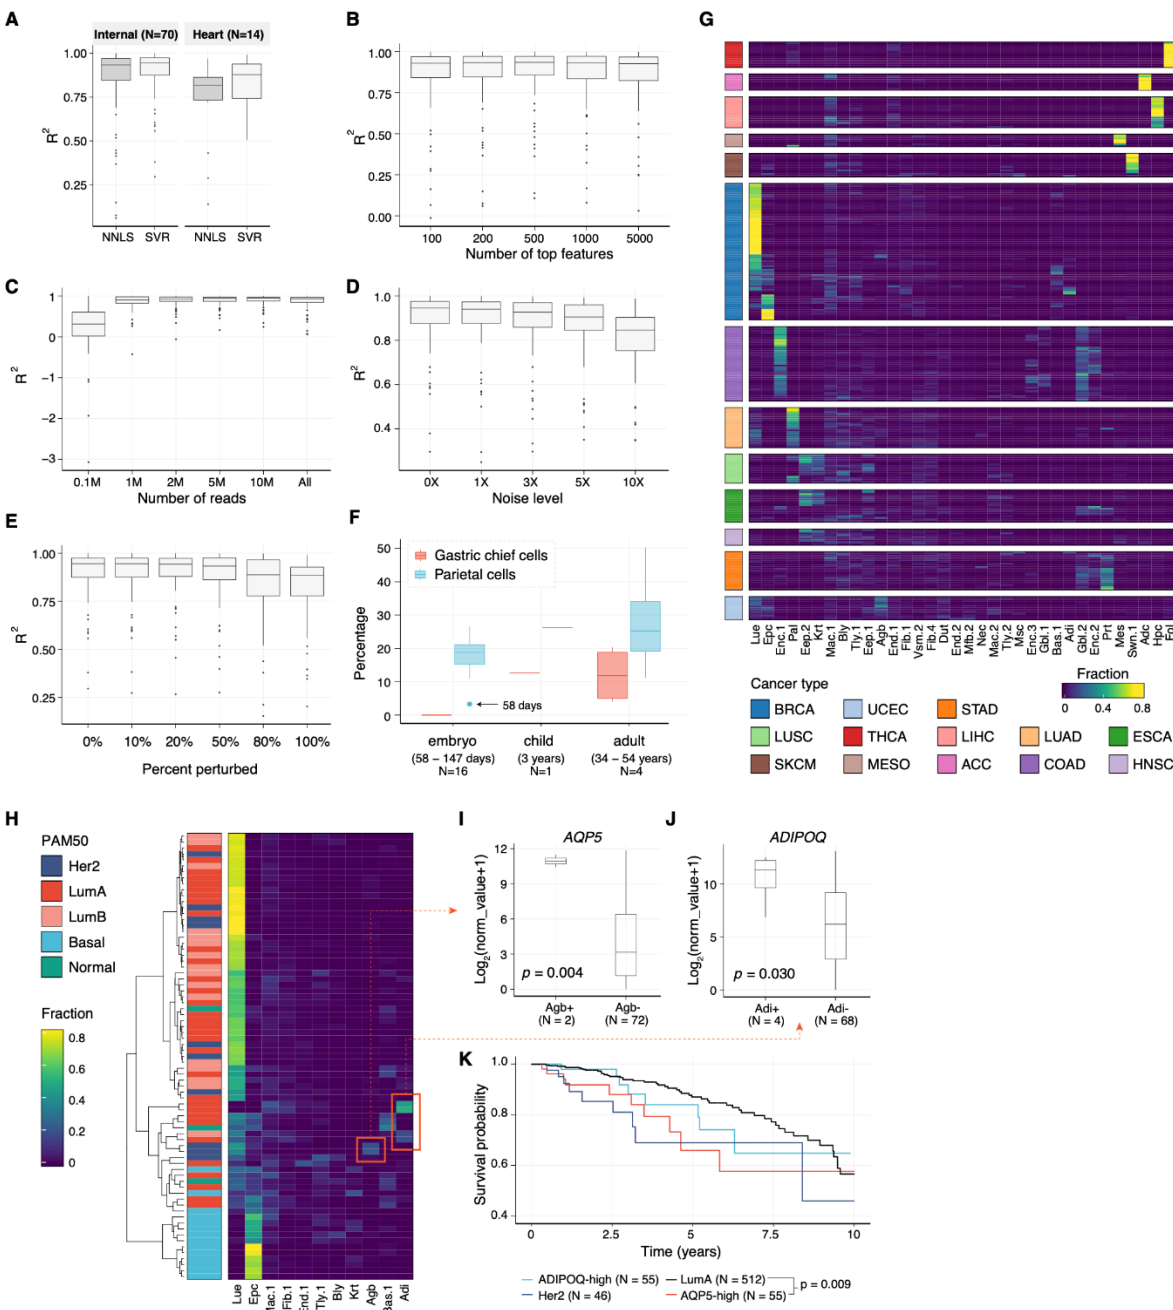

791  
 792 Supplemental Figure 10 | **CRE cytometry reveals tissue heterogeneity of primary human**  
 793 **cancer.** **A)** Boxplot showing the performance of two deconvolution algorithms, namely non-  
 794 negative least squares regression (NNLS) and support vector regression (SVR). The performance  
 795 is measured by coefficient of determination ( $R^2$ ) between estimated cell-type composition and  
 796 actual cell-type composition determined by sci-ATAC-seq experiments. In addition to the dataset  
 797 generated in this study, referred to as “internal”, we performed benchmarking using independent  
 798 sci-ATAC-seq datasets from 14 heart (Hocker et al., 2020). **B)** Boxplot showing the performance

799 of NNLS, measured by coefficient of determination, under different choices of signature CREs.  
800 For example, “100” indicates selecting top 100 most specific CREs from each cell types. **C)**  
801 Boxplot showing the performance of SVR under different rates of down sampling. **D)** Boxplot  
802 showing the performance of SVR under different noise levels. For example, “1X” indicates  
803 introducing 100% more noise to the data. **E)** Boxplot showing the performance of SVR when  
804 introducing noise to a random subset of the signature CREs. The noise level here is fixed to “10X”.  
805 **F)** Boxplot showing estimated cell-type composition of 21 human stomach tissue stratified by life  
806 stage. The deconvolution was performed on bulk DNase-seq data using the SVR algorithm. **G)**  
807 Heatmap representation of cell-type composition of 275 cancer samples from TCGA. Color  
808 represents cell-type fraction. Color bars to the left depict the cancer type (BRCA = Breast invasive  
809 carcinoma, LUSC = Lung squamous cell carcinoma, SKCM = Skin cutaneous melanoma, UCEC  
810 = Uterine corpus endometrial carcinoma, THCA = Thyroid carcinoma, MESO = Mesothelioma,  
811 STAD = Stomach adenocarcinoma, LIHC = Liver hepatocellular carcinoma, ACC = Adrenocortical  
812 carcinoma, LUAD = Lung adenocarcinoma, COAD = Colon adenocarcinoma, ESCA =  
813 Esophageal carcinoma, HNSC = Head and neck squamous cell carcinoma). The deconvolution  
814 was performed on bulk ATAC-seq data using the SVR algorithm. **H)** Heatmap representation of  
815 cell-type composition of 75 breast cancer samples. Color represents cell-type fraction. The  
816 dendrogram was generated by hierarchical clustering. Published PAM50 classification scheme  
817 (Berger et al., 2018) is shown on the left. **I)** Boxplot showing the AQP5 gene expression level in  
818 breast cancer samples stratified by the presence of airway goblet cell signature. **J)** Boxplot  
819 showing the ADIPOQ gene expression level in breast cancer samples stratified by the existence  
820 of adipocyte signature. **K)** Kaplan-Meier analysis of overall survival of breast cancer sample  
821 donors in four subtype groups: LumA (N=512), AQP5 overexpressed (N=55), ADIPOQ  
822 overexpressed (N=55) and Her2 (N=46).  
823



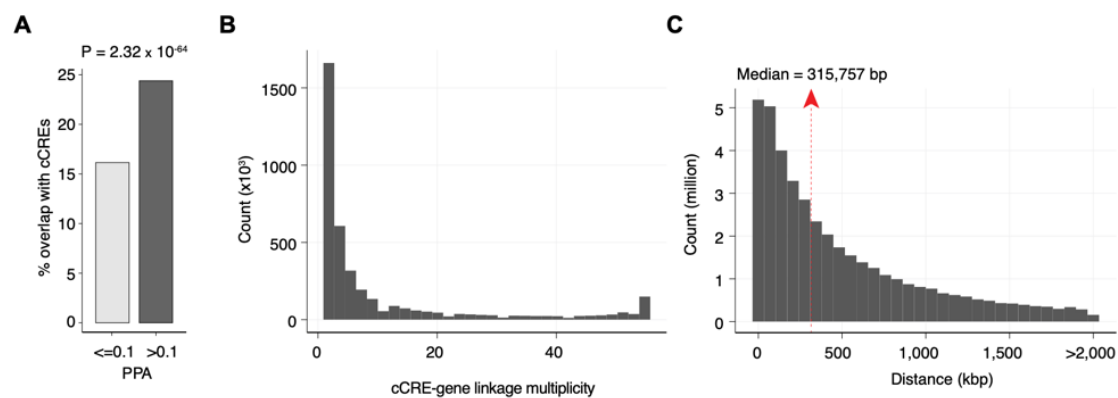

824  
825 Supplemental Figure 11 | **Characterization of fine mapped risk variant.** **A)** Bar graph showing  
826 the percentage of likely causal (Posterior Probability of Association; PPA > 0.1) fine mapped  
827 GWAS variants from 48 traits and diseases that overlap the union set of cCREs in adult cell types  
828 in the present study. Fisher's exact test was used to compute statistical significance. **B)** Histogram  
829 showing the multiplicities of cCRE-gene linkage (number of cell types having the linkage). **C)**  
830 Histogram showing distances in kilobase pairs (kbp) for distal cCRE-to-gene linkages from Activity  
831 by Contact (ABC) analysis (Fulco et al., 2019) (ABC score > 0.02).  
832

833 **SUPPLEMENTARY TABLES**

- 834 Table S1: Donor clinical characteristics and contributions to sci-ATAC-seq datasets.
- 835 Table S2: Feasibility testing results for primary human tissue types.
- 836 Table S3: Quality control data for sci-ATAC-seq datasets.
- 837 Table S4: Clustering information and quality control data for sci-ATAC-seq nuclei.
- 838 Table S5: Cell type annotations and example marker genes.
- 839 Table S6: Union set of cCREs.
- 840 Table S7: GREAT ontology results for cCRE modules.
- 841 Table S8: Similarity scores for bulk ATAC-seq and DNase-seq biosamples.
- 842 Table S9: GWAS LDSC enrichment Z-scores and P-values.
- 843 Table S10: PPAs, overlapping cCREs, corresponding cell types, motifs altered, and candidate  
844 target genes for likely causal GWAS variants.
- 845 Table S11: Oligo and primer sequences for sci-ATAC-seq.
- 846 Table S12: Primer sequences for feasibility test RT-PCR.

## 847 **METHODS**

848

### 849 **Human Tissues**

850 Adult human tissue samples were acquired by the ENTE<sub>x</sub> collaborative project (Stranger et al.,  
851 2017) via the GTEx collection pipeline (Carithers et al., 2015). All human donors were deceased,  
852 and informed consent was obtained via next-of-kin consent for the collection and banking of  
853 deidentified tissue samples for scientific research. Donor eligibility requirements were as  
854 described previously (Carithers et al., 2015), and excluded individuals with metastatic cancer and  
855 individuals who had received chemotherapy for cancer within the prior two years.

856

### 857 **Tissue feasibility testing for sci-ATAC-seq**

858 Frozen tissue samples were sectioned on dry ice into two aliquots of equivalent mass. For nuclear  
859 isolation, one aliquot was subjected to manual pulverization via mortar and pestle while  
860 submerged in liquid nitrogen, and the other aliquot was homogenized in a gentleMACS M-tube  
861 (Miltenyi) on a gentleMACS Octo Dissociator (Miltenyi) using the “Protein\_01\_01” protocol in  
862 MACS buffer (5 mM CaCl<sub>2</sub>, 2 mM EDTA, 1X protease inhibitor (Roche, 05-892-970-001), 300  
863 mM MgAc, 10 mM Tris-HCL pH 8, 0.6 mM DTT) and pelleted with a swinging bucket centrifuge  
864 (500 x g, 5 min, 4°C; 5920R, Eppendorf). Pulverized frozen tissue and pelleted nuclei from  
865 gentleMACS M-tubes were each split into two further aliquots. One aliquot from each of the two  
866 nuclear isolation conditions was then resuspended in 1 mL Nuclear Permeabilization Buffer (1X  
867 PBS, 5% Bovine Serum Albumin, 0.2% IGEPAL CA-630 (Sigma), 1 mM DTT, 1X Protease  
868 inhibitor), and the other aliquot from the same nuclear isolation condition was resuspended in 1  
869 mL OMNI Buffer (10mM Tris-HCL (pH 7.5), 10mM NaCl, 3mM MgCl<sub>2</sub>, 0.1% Tween-20 (Sigma),  
870 0.1% IGEPAL-CA630 (Sigma) and 0.01% Digitonin (Promega) in water), yielding a total of four  
871 nuclear isolation/nuclear permeabilization buffer conditions tested for each tissue type. Nuclei  
872 were rotated at 4 °C for 5 minutes before being pelleted again with a swinging bucket centrifuge  
873 (500 x g, 5 min, 4°C; 5920R, Eppendorf). After centrifugation, permeabilized nuclei were  
874 resuspended in 500 µL high salt tagmentation buffer (36.3 mM Tris-acetate (pH = 7.8), 72.6 mM  
875 potassium-acetate, 11 mM Mg-acetate, 17.6% DMF) and counted using a hemocytometer.  
876 Concentration was adjusted to 2,000 nuclei/9 µl, and 2,000 nuclei were dispensed 12 wells of a  
877 96-well plate per nuclear isolation/permeabilization condition (samples were processed in batches  
878 of 4 nuclear isolation/permeabilization conditions per 2 different tissue samples). For  
879 tagmentation, 1 µL barcoded Tn5 transposomes (Table S11) were added using a BenchSmart™  
880 96 (Mettler Toledo), mixed five times, and incubated for 60 min at 37 °C with shaking (500 rpm).

881 To inhibit the Tn5 reaction, 10  $\mu$ L of 40 mM EDTA (final 20mM) were added to each well with a  
882 BenchSmart™ 96 (Mettler Toledo) and the plate was incubated at 37 °C for 15 min with shaking  
883 (500 rpm). Next, 20  $\mu$ L of 2x sort buffer (2 % BSA, 2 mM EDTA in PBS) were added using a  
884 BenchSmart™ 96 (Mettler Toledo). All 12 wells from each nuclear isolation/permeabilization  
885 condition were combined into a separate FACS tube, and stained with Draq7 at 1:150 dilution  
886 (Cell Signaling). For each nuclear isolation/permeabilization condition, we used a SH800 (Sony)  
887 to sort four wells containing 0 nuclei per well and four wells containing 80 nuclei per well into one  
888 96-well plate (total of 768 wells) containing 10.5  $\mu$ L EB (25 pmol primer i7, 25 pmol primer i5, 200  
889 ng BSA (Sigma)). After addition of 1  $\mu$ L 0.2% SDS using a BenchSmart™ 96 (Mettler Toledo),  
890 the 96 well plate was incubated at 55 °C for 7 min with shaking (500 rpm). 1  $\mu$ L 12.5% Triton-X  
891 was added to each well to quench the SDS. Next, 12.5  $\mu$ L NEBNext High-Fidelity 2 $\times$  PCR Master  
892 Mix (NEB) were added to each well and samples were PCR-amplified (72 °C 5 min, 98 °C 30 s,  
893 (98 °C 10 s, 63 °C 30 s, 72°C 60 s)  $\times$  12 cycles, held at 12 °C). After PCR, all wells were assayed  
894 for DNA library concentration using the PerfeCTa NGS Quantification RT-qPCR Kit (Quanta  
895 Biosciences) according to manufacturer's protocols, and subsequently returned to the thermal  
896 cycler for a second round of PCR amplification (72 °C 5 min, 98 °C 30 s, (98 °C 10 s, 63 °C 30 s,  
897 72°C 60 s)  $\times$  4 cycles, held at 12 °C). After the second PCR amplification, for each nuclear  
898 isolation/permeabilization condition, wells containing 0 nuclei were combined and wells containing  
899 80 nuclei were combined. The resulting DNA libraries were purified according to the MinElute  
900 PCR Purification Kit manual (Qiagen) and size selection was performed with SPRISelect reagent  
901 (Beckmann Coulter, 0.55x and 1.5x). Final libraries were quantified using a Qubit fluorimeter (Life  
902 technologies) and a nucleosomal pattern of fragment size distribution was verified using a  
903 Tapestation (High Sensitivity D1000, Agilent). We calculated a signal to noise ratio for final  
904 feasibility test libraries using LightCycler® 480 SYBR Green I Master Mix (Roche) along with  
905 custom primers for the promoter of human *GAPDH* and a heterochromatic gene desert region  
906 (Table S12). For each tissue type, the nuclear isolation/permeabilization condition that resulted in  
907 optimized nuclear yield (nuclei/mg tissue), library concentrations > 50 pM per 80 sorted nuclei,  
908 nucleosomal distribution pattern of fragments, and a  $\log_2(\text{signal to noise ratio}) > 3.3$  was selected  
909 for combinatorial indexing-assisted single nucleus ATAC-seq (Table S2).

910

### 911 **Combinatorial indexing-assisted single nucleus ATAC-seq**

912 Combinatorial indexing-assisted single nucleus ATAC-seq was performed as described  
913 previously (Preissl et al., 2018) with slight modifications (Hocker et al., 2020). Nuclei were isolated  
914 and permeabilized according to the optimized conditions from feasibility testing (Table S2). After

915 resuspension in permeabilization buffer, nuclei were rotated at 4 °C for 5 minutes before being  
916 pelleted again with a swinging bucket centrifuge (500 x g, 5 min, 4°C; 5920R, Eppendorf). After  
917 centrifugation, permeabilized nuclei were resuspended in 500 µL high salt tagmentation buffer  
918 (36.3 mM Tris-acetate (pH = 7.8), 72.6 mM potassium-acetate, 11 mM Mg-acetate, 17.6% DMF)  
919 and counted using a hemocytometer. Concentration was adjusted to 2,000 nuclei/9 µl, and 2,000  
920 nuclei were dispensed into each well of a 96-well plate per sample (96 tagmentation wells/sample,  
921 samples were processed in batches of 2-4 samples). For tagmentation, 1 µL barcoded Tn5  
922 transposomes (Table S11) were added using a BenchSmart™ 96 (Mettler Toledo), mixed five  
923 times, and incubated for 60 min at 37 °C with shaking (500 rpm). To inhibit the Tn5 reaction, 10  
924 µL of 40 mM EDTA (final 20mM) were added to each well with a BenchSmart™ 96 (Mettler  
925 Toledo) and the plate was incubated at 37 °C for 15 min with shaking (500 rpm). Next, 20 µL of  
926 2x sort buffer (2 % BSA, 2 mM EDTA in PBS) were added using a BenchSmart™ 96 (Mettler  
927 Toledo). All wells were combined into a separate FACS tube for each sample, and stained with  
928 Draq7 at 1:150 dilution (Cell Signaling). Using a SH800 (Sony), 20 nuclei per sample were sorted  
929 per well into eight 96-well plates (total of 768 wells) containing 10.5 µL EB (25 pmol primer i7, 25  
930 pmol primer i5, 200 ng BSA (Sigma)). Preparation of sort plates and all downstream pipetting  
931 steps were performed on a Biomek i7 Automated Workstation (Beckman Coulter). After addition  
932 of 1 µL 0.2% SDS, samples were incubated at 55 °C for 7 min with shaking (500 rpm). 1 µL 12.5%  
933 Triton-X was added to each well to quench the SDS. Next, 12.5 µL NEBNext High-Fidelity 2x  
934 PCR Master Mix (NEB) were added and samples were PCR-amplified (72 °C 5 min, 98 °C 30 s,  
935 (98 °C 10 s, 63 °C 30 s, 72°C 60 s) × 12 cycles, held at 12 °C). After PCR, all wells were combined.  
936 Libraries were purified according to the MinElute PCR Purification Kit manual (Qiagen) using a  
937 vacuum manifold (QIAvac 24 plus, Qiagen) and size selection was performed with SPRISelect  
938 reagent (Beckmann Coulter, 0.55x and 1.5x). Libraries were purified one more time with  
939 SPRISelect reagent (Beckman Coulter, 1.5x). Libraries were quantified using a Qubit fluorimeter  
940 (Life technologies) and a nucleosomal pattern of fragment size distribution was verified using a  
941 Tapestation (High Sensitivity D1000, Agilent). Libraries were sequenced on a NextSeq500 or  
942 HiSeq4000 sequencer (Illumina) using custom sequencing primers with following read lengths:  
943 50 + 10 + 12 + 50 (Read1 + Index1 + Index2 + Read2). Primer and index sequences are listed in  
944 Table S11.

945

#### 946 **Demultiplexing of single nucleus ATAC-seq sequencing reads**

947 For each sequenced single nucleus ATAC-Seq library, we obtained four FASTQ files, two for  
948 paired end DNA reads and two for the combinatorial indexes for i5 and T7 (768 and 364 indices,

949 respectively). We selected all reads with up to 2 mismatches per i5 and T7 index (Hamming  
950 distance between each pair of indices is 4) and integrated the concatenated barcode at the  
951 beginning of the read name in the demultiplexed FASTQ files. The customized scripts can be  
952 found at: <https://gitlab.com/Groumf/ATACdemultiplex/>.

953

#### 954 **Quality control metrics: TSS enrichment and unique fragments**

955 TSS positions were obtained from the GENCODE database v31 (Frankish et al., 2019). Tn5  
956 corrected insertions were aggregated  $\pm 2000$  bp relative (TSS strand-corrected) to each unique  
957 TSS genome wide. Then this profile was normalized to the mean accessibility  $\pm$  (1900 to 2000)  
958 bp from the TSS and smoothed every 11 bp. The max of the smoothed profile was taken as the  
959 TSS enrichment. We then filtered out all single cells that had fewer than 1,000 unique fragments  
960 and/or a TSS enrichment of less than 7 for all data sets.

961

#### 962 **Overall clustering strategy**

963 We utilized two rounds of clustering analysis to identify cell clusters. The first round of clustering  
964 analysis was performed on individual samples. We divided the genome into 5kb consecutive  
965 windows and then scored each cell for any insertions in these windows, generating a window by  
966 cell binary matrix for each sample. We filtered out those windows that are generally accessible in  
967 all cells for each sample using z-score threshold 1.65. Based on the filtered matrix, we then carried  
968 out dimension reduction followed by graph-based clustering to identify cell clusters. We called  
969 peaks for each cluster using the aggregated profile of accessibility and then merged the peaks  
970 from all clusters to generate a union peak list. Based on the peak list, we generated a cell-by-  
971 peak count matrix and used Scrublet (Wolock et al., 2019) to remove potential doublets. Next, to  
972 carry out the second round of clustering analysis, we merged peaks called from all samples to  
973 form a reference peak list. We then generated a single binary cell-by-peak matrix using cells from  
974 all samples and again performed the dimension reduction followed by graph-based clustering to  
975 obtain the final cell clusters across the entire dataset.

976

#### 977 **Doublet removal**

978 We applied Scrublet to the cell-by-peak count matrix with default parameters. Doublet scores  
979 returned by Scrublet were then used to fit a two-component Gaussian mixture model using the  
980 “BayesianGaussianMixture” function from the python package “scikit-learn”. The component with  
981 larger mean doublet score is presumably formed by doublets and cells belonging to it were  
982 removed from downstream analysis.

983

## 984 **Dimension reduction**

985 To find the low-dimensional manifold of the single cell data, we adapted our previously published  
986 method, SnapATAC (Fang et al., 2020), to reduce the dimensionality of the peak by cell count  
987 matrix. The previous iteration of SnapATAC utilized spectral embedding for dimension reduction.  
988 To further increase the performance and scalability of spectral embedding, we applied the  
989 Nyström method (Bouneffouf and Birol, 2016) for handling large datasets. Specifically, we first  
990 randomly sampled 35,000 cells as the training data. We then computed the Jaccard index  
991 between each pair of cells in the training set and constructed the similarity matrix  $S$ . We computed  
992 the matrix  $P = D^{-1}S$ , where  $D$  is the diagonal matrix such that  $D_{ii} = \sum_j S_{ij}$ . The  
993 eigendecomposition was performed on  $P$  and the eigenvector with eigenvalue 1 was discarded.  
994 From the rest of the eigenvectors, we took the first 30 of them corresponding to the largest  
995 eigenvalues as the spectral embedding of the training data. We utilized the Nyström method to  
996 extend the embedding to the data outside the training set. Given a set of unseen samples, we  
997 computed the similarity matrix  $S'$  between the new samples and the training set. The embedding  
998 of the new samples is given by  $U' = S'UA^{-1}$ , where  $U$  and  $\Lambda$  are the eigenvectors and eigenvalues  
999 of  $P$  obtained in the previous step.

1000

## 1001 **Correction of Batch Effects**

1002 Inspired by the mutual nearest neighbor batch-effect-correction method (Haghverdi et al., 2018),  
1003 we developed a variant using mutual nearest centroids to iteratively correct for batch effects in  
1004 multiple donor samples. Specifically, after dimension reduction we performed k-means clustering  
1005 on individual replicate or donor sample with k equal to 20. We choose this number because the  
1006 number of major clusters in a given tissue sample is typically less than 20. We then computed the  
1007 centroid for each cluster and identified pairs of mutual nearest centroids across different batches.  
1008 These mutual nearest centroids were used as the anchors to match the cells between different  
1009 batches and correct for batch effects as described previously (Haghverdi et al., 2018). We found  
1010 that the result can be further improved by performing above steps iteratively. However, too many  
1011 iterations may lead to over-correction. We therefore used two iterations in this study.

1012

## 1013 **Graph-based clustering algorithm**

1014 We constructed the k-nearest neighbor graph (k-NNG) using low-dimensional embedding of the  
1015 cells with k equal to 50. We then applied the Leiden algorithm (Traag et al., 2019) to find  
1016 communities in the k-NNG corresponding to cell clusters. The Leiden algorithm can be configured

1017 to use different quality functions. The modularity model is a popular choice but it suffers from the  
1018 issue of resolution-limit, particularly when the network is large (Traag et al., 2011). Therefore, we  
1019 used the modularity model only in the first round of clustering analysis to identify initial clusters.  
1020 In the final round of clustering, we chose the constant Potts model as the quality function since it  
1021 is resolution-limit-free and is better suited for identifying rare populations in a large dataset (Traag  
1022 et al., 2011). To determine the optimal number of clusters, we varied the resolution parameter in  
1023 the Leiden algorithm and computed the clustering stability and diversity under each resolution.  
1024 Cluster stability was defined as the consistency, measured by the average adjusted rand index,  
1025 of results from five independent clustering analyses on perturbed inputs. The perturbation was  
1026 introduced in a way that 2% of the edges were randomly selected and subjected to removal. To  
1027 compute the cluster diversity, i.e., the extent to which different replicates are uniformly  
1028 represented, we first grouped the cells based on their tissue of origin and then based on the  
1029 experimental batch. We counted the cells for each combination and normalized by the total  
1030 number of cells in the corresponding sample. For each tissue, normalized entropy was computed  
1031 across batches. The average entropy across all tissues in the cluster were taken as the cluster  
1032 diversity. Finally, we selected the highest resolution that had stability >0.9 and diversity >0.9.

1033

#### 1034 **Iterative clustering analysis of major cell clusters**

1035 To further investigate the heterogeneity of identified cell clusters, we performed another round of  
1036 clustering on 27 out of 54 cell clusters that had enough cells (> 1000) and minimal batch effects  
1037 (diversity > 0.9), i.e., replicates are almost equally represented. For each of these cell clusters,  
1038 we performed dimension reduction, batch correction and graph-based clustering as above. To  
1039 avoid over-clustering, we selected the resolution parameter that lead to stable clustering results  
1040 (stability > 0.9). 15 out of 27 cell clusters under investigation were found to contain more than one  
1041 subcluster.

1042

#### 1043 **Generating the union peak set**

1044 For each cluster, peak calling was performed on Tn5-corrected single-base insertions (each end  
1045 of the Tn5-corrected fragments) using the MACS2 (Zhang et al., 2008) callpeak command with  
1046 parameters “-shift -100 -extsize 200 -nomodel -call-summits -nolambda -keep-dup all -q 0.01”,  
1047 filtered by the hg38 blacklist version 2 (downloaded from <https://github.com/Boyle-Lab/Blacklist/tree/master/lists>). To compile a union peak set, we combined peaks from all clusters  
1048 and extended the peak summits by 250 bp on either side. Overlapping peaks were then handled  
1049 using an iterative removal procedure. First, the most significant peak, i.e., the peak with the  
1050



1051 smallest p-value, was kept and any peak that directly overlapped with it was removed. Then, this  
1052 process was iterated to the next most significant peak and so on until all peaks were either kept  
1053 or removed due to direct overlap with a more significant peak.

1054

### 1055 **Computing relative accessibility scores**

1056 We define an accessible locus as the minimal genomic region that can be bound and cut by the  
1057 Tn5 enzyme. We use  $L \subset N$  to represent the set of all accessible loci. We further define a pseudo-  
1058 locus as the set of accessible loci that relates to each other in certain meaningful way (for  
1059 example, nearby loci, loci from different alleles). In this example, pseudo-loci correspond to peaks.  
1060 We use  $\{d_i \mid d_i \subset L\}$  to represent the set of all pseudo-loci. Let  $a_l$  be the accessibility of  
1061 accessible locus  $l$ , where  $l \in L$ . We define the accessibility of pseudo-locus  $d_i$  as  $A_i = \sum_{k \in d_i} a_k$ ,  
1062 *i.e.*, the sum of accessibility of accessible loci associated with  $d_i$ . Let  $C_j$  be the library complexity  
1063 (the number of distinct molecules in the library) of cell  $j$ . Assuming unbiased PCR amplification,  
1064 then the probability of being sequenced for any fragment in the library is:  $s_j = 1 - (1 - \frac{1}{C_j})^{k_j}$ ,  
1065 where  $k_j$  is the total number of reads for cell  $j$ . If we assume that the probability of a fragment  
1066 present in the library is proportional to its accessibility and the complexity of the library, then we  
1067 can deduce that the probability of a given locus  $l$  in cell  $j$  being sequenced is:  $p_{lj} \propto a_l C_j s_j$ . For  
1068 any pseudo-locus  $d_i$ , the number of reads in  $d_i$  for cell  $j$  follows a Poisson binomial distribution,  
1069 and its mean is  $m_{ij} = \sum_{k \in d_i} p_{kj} \propto C_j s_j \sum_{k \in d_i} a_k = C_j s_j A_i$ . Given a pseudo-locus (or peak) by cell  
1070 count matrix  $O$ , we have:  $\sum_j O_{ij} = \sum_j m_{ij}$ . Therefore,  $A_i = Z \frac{\sum_j O_{ij}}{\sum_j C_j s_j}$ , where  $Z$  is a normalization  
1071 constant. When comparing across different samples the relative accessibility may be desirable  
1072 as they sum up to a constant, *i.e.*,  $\sum_i A_i = 1 \times 10^6$ . In this case, we can derive  $A_i = \frac{\sum_j O_{ij}}{\sum_{ij} O_{ij}} * 10^6$ .

1073

### 1074 **Assigning cell types to cell clusters**

1075 To annotate the cell clusters, we first curated a set of marker genes from the PanglaoDB (Franzén  
1076 et al., 2019) corresponding to expected cell types. We aggregated open chromatin fragments  
1077 from each cluster and utilized the promoter accessibility, defined as RPM of +/- 1kb around TSS,  
1078 as the proxy for gene activity. We then computed the raw cell type enrichment score as the  
1079 logarithm of the geometric mean of marker genes' activity. The final enrichment scores were  
1080 obtained by applying two rounds of z-score transformation, first across cell types and then across  
1081 cell clusters, on raw enrichment scores. For each cluster, we picked the cell type that showed  
1082 strongest enrichment to make initial assignments. Finally, we manually reviewed these

1083 assignments and made adjustments based on focused consideration of marker gene accessibility  
1084 in conjunction with information about tissue(s) of origin.

1085

### 1086 **Identification of cell type-restricted peaks**

1087 We used a Shannon entropy-based method (Schug et al., 2005) to identify cell type-specific  
1088 peaks. Given the relative accessibility scores of a peak across clusters, we first converted the  
1089 scores to probabilities:  $p_i = q_i / \sum_i q_i$ . The entropy was then calculated by:  $H_p = - \sum_t p_t \log_2(p_t)$ .  
1090 The specificity score is  $Q_{p|t} = H_p - \log_2(p_t)$ . To estimate the statistical significance of specificity  
1091 scores, we assumed that under the null hypothesis each peak has an average accessibility level  
1092 across all cell types and that the log base 2 of the cell-type-dependent fold changes from the  
1093 average level follow a normal distribution with mean equal to zero and standard deviation  $s$ . The  
1094 value of  $s$  was estimated using the top 50% least variable peaks, and 500,000 samples were then  
1095 drawn to form the empirical distribution of  $Q_p$  that are used to determine the p-values of specificity  
1096 scores. The cell-type-restricted peaks were then identified using a FDR cutoff of 0.1%.

1097

### 1098 **Cell-type enrichment analysis of fine-mapped GTEx eQTLs**

1099 The fine-mapped eQTLs (GTEx Analysis V8) in each of the 25 tissues were downloaded from the  
1100 GTEx portal (<https://gtexportal.org>). For each tissue, we first identified the overlapping cCREs  
1101 with its eQTLs. We then calculated the average of log-transformed accessibility scores of these  
1102 peaks in each of the 54 cell types. This yielded a tissue by cell-type table containing raw cell-type  
1103 enrichment scores of eQTLs from each tissue. The raw enrichment scores were then normalized  
1104 row-wise using z-score transformation. For each tissue, we defined the maximum cell-type  
1105 enrichment as the largest value of z-scores across 54 cell types. In general, we found that  
1106 homogenous tissues tend to have higher maximum cell-type enrichment than tissues that are  
1107 more heterogenous.

1108

### 1109 **Differential peak analysis**

1110 To carry out differential peak analysis between foreground set and background set, we first  
1111 removed all peaks with fold changes of relative accessibility less than 2. For each peak, we then  
1112 built a full model and a reduced model.

1113 
$$\log \frac{P_{full}}{1 - P_{full}} = \beta_0 + \beta_1 r + \beta_2 c$$

1114 
$$\log \frac{P_{reduced}}{1 - P_{reduced}} = \beta_0 + \beta_1 r$$

1115  $P_{reduced}$  and  $P_{full}$  represent the likelihood of the reduced model and full model respectively.  $r$   
1116 contains the logarithm of the number of fragments.  $c$  is a categorical variable indicating if the cell  
1117 comes from the foreground or the background. We then used a likelihood ratio test framework to  
1118 determine whether the full model provided a significantly better fit of the data than the reduced  
1119 model. We selected the sites using a 5% FDR threshold (Benjamini-Hochberg method).

1120

### 1121 **Identification of fibroblast core signature and subtype-specific signatures**

1122 We first performed pairwise differential peak analysis for the six fibroblast subtypes. We then  
1123 defined fibroblast core signature as peaks that are shared by all subtypes and were not called as  
1124 differentially accessible in any of the pairwise comparison. Likewise, we defined the specific  
1125 signature for a subtype as peaks that are differentially more accessible in the given subtype for  
1126 every pairwise comparison.

1127

### 1128 **Measuring the similarity of chromatin accessibility profiles between cell types identified 1129 by sci-ATAC-seq and bulk biosamples**

1130 We downloaded bulk DNase-seq data from the ENCODE portal. We excluded samples collected  
1131 at embryonic stage or originated from kidney, bladder or brain tissues, as we did not perform  
1132 experiments on those tissues. As a result, 638 datasets were kept for downstream analysis. For  
1133 each of the DNase-seq datasets, we calculated its Pearson correlation coefficient with 54  
1134 identified cell types based on RPKM values at identified cCREs. These correlation scores were  
1135 then scaled using z-score transformation across 54 cell types. We used the maximum of scaled  
1136 correlation scores to represent each biosample's overall similarity with sci-ATAC-seq cell types.

1137

### 1138 **Identification of cCRE modules**

1139 A cCRE module is defined as co-accessible regions or regions that share similar accessibility  
1140 pattern across cell types. We set a large  $k$  equal to 150 in k-mean clustering in order to capture  
1141 complex patterning of 756,414 cCREs across 54 cell types. While the large number of clusters  
1142 can better represent the complexity of the data, it also raises challenges for interpretability and  
1143 downstream analysis. To address this, we further aggregated the 150 clusters into 51 super-  
1144 clusters or CRE modules using hierarchical clustering. These 51 CRE modules were then retained  
1145 for functional analysis and sequence motif analysis.

1146

### 1147 **Explaining cell-type specificity of CRE modules by deep learning**

1148 We used machine learning to investigate the extent to which the nucleotide sequences contribute  
1149 to the cell type-specific chromatin accessibility pattern represented by the 51 cCRE modules.  
1150 Specifically, we designed a sequence-to-module convolutional neural network (CNN) that uses  
1151 one-hot-encoded DNA sequence ( $A = [1,0,0,0]$ ,  $C = [0,1,0,0]$ ,  $G = [0,0,1,0]$ ,  $T = [0,0,0,1]$ ) as input  
1152 to predict the module class for every cCRE. The architecture of CNN consists of a sequence of  
1153 convolutional layers. Each convolutional layer has 64 filters with varying width. The first  
1154 convolutional layer uses a filter width of 25 bp to scan the 500 bp region for relevant sequence  
1155 motifs. This layer is then followed by 5 dilated convolutional layers (filter width 3) where the dilation  
1156 rate doubles at every layer. A fully connected softmax layer is used after the convolutional layers  
1157 to get module classes as the output. To ensure each module is uniformly represented in the  
1158 training and testing datasets, we randomly selected 100 cCREs from each module to form the  
1159 testing dataset. From the remaining cCREs, we then used oversampling to randomly sample  
1160 20,000 cCREs from each module to form the training dataset. We applied the Adam optimization  
1161 algorithm to train the model until the validation accuracy stopped improving. To help interpret the  
1162 model, we used the TF-MoDISco algorithm (Shrikumar et al., 2018) to extract the sequence motif  
1163 features from the model and used TOMTOM (Gupta et al., 2007) to identify matched known TF  
1164 motifs from a public database (Weirauch et al., 2014).

1165

#### 1166 **Identification of candidate driver TFs**

1167 We used the Taiji pipeline (Zhang et al., 2019) to identify candidate driver TFs in each cell cluster.  
1168 Briefly, for each cell type cluster, we constructed the TF regulatory network by scanning TF motifs  
1169 at the accessible chromatin regions and linking them to the nearest genes. The network is directed  
1170 with edges from TFs to target genes. The genes' weights in the network were determined based  
1171 on the relative accessibility of their promoters. The weights of the edges were calculated by the  
1172 relative accessibility of the promoters of the source TFs. We then used the personalized  
1173 PageRank algorithm to rank the TFs in the network.

1174

#### 1175 **Comparing chromatin accessibility landscapes between adult and fetal cell types**

1176 To compare our dataset with the recent cell atlas of fetal chromatin accessibility (Domcke et al.,  
1177 2020), we downloaded the bigwig files for different cell types in fetal tissues and converted the  
1178 genomic coordinates from GRC37 (hg19) to GRCh38. In order to make a comparison, we focused  
1179 on cell types present in eight organs that are profiled in both studies, including heart, intestine,  
1180 muscle, adrenal gland, pancreas, lung, stomach, and liver. For each cell type, we then calculated  
1181 the signal enrichment in the union peak list obtained by merging peaks from adult and fetal cell

1182 types. We applied quantile normalization to the resulting signal enrichment scores in order to  
1183 mitigate technical or batch effects between the two datasets. We then compared the enrichment  
1184 scores between adult and fetal cell types using Pearson correlation. To remove noise from the  
1185 correlation calculation, for each pair of cell types we excluded regions that had enrichment scores  
1186 less than 1 in both cell types from the calculation. To estimate the significance level of correlation  
1187 scores, we used correlation scores from unmatched cell types to build a null model. We observed  
1188 that these scores were roughly Gaussian distributed, and we used the sample mean and variance  
1189 to parameterize a Gaussian model for computing p-values of correlation scores. To identify adult-  
1190 specific peaks, for each peak we obtained the maximum value of enrichment scores across cell  
1191 types in adult and fetal cell types respectively. We then log-transformed the maximum scores and  
1192 computed the fold change between adult and fetus. We retained peaks with a fold change greater  
1193 than 1.5 as adult-specific peaks. We used a similar strategy with some modifications when  
1194 comparing the peaks in the same cell types from adult and fetus. Instead of taking the maximum,  
1195 we compared average enrichment scores and used a more stringent cutoff of 2 for fold change  
1196 thresholding.

1197

#### 1198 **Generation of bigwig tracks**

1199 Each Tn5-corrected insertion was extended in both directions by 100 bp to form a 200-bp  
1200 fragment. We then counted the number of fragments overlapping with each base on the genome  
1201 and generated a bedgraph file. The bedgraph file was converted to bigwig file using the  
1202 “bedGraphToBigWig” tool.

1203

#### 1204 **Linking cCREs to target genes**

1205 We downloaded the chromosome interactions called from published promoter capture Hi-C data  
1206 in 14 human tissues (Jung et al., 2019). In each tissue, we first filtered the chromosome  
1207 interactions using a lenient p-value cutoff of 0.1. We then created the chromosome interaction  
1208 matrix using the normalized interaction frequency. The interaction matrices from 14 tissues were  
1209 then averaged to get the final interaction matrix. We applied the Activity-by-Contact (ABC) Model  
1210 (Fulco et al., 2019) to compute the ABC Score for each cCRE-gene pair as the product of Activity  
1211 (chromatin accessibility) and Contact (interaction frequency), normalized by the product of Activity  
1212 and Contact for all other cCREs. We retained all distal cCRE-gene connections with an ABC score  
1213 greater than 0.02.

1214

1215 **Estimating cell-type composition for tissues by deconvolution of bulk chromatin**  
1216 **accessibility profiles**

1217 We selected 500 cCREs that were most specifically accessible in each of the 54 cell types  
1218 according to the specificity scores defined above. These cCREs were used to create a signature  
1219 cCRE matrix, which contained accessibility scores of 19,591 distinct cCREs across 54 cell types.  
1220 To estimate the fractions of 54 cell types from chromatin accessibility profiles of bulk tissue  
1221 samples, we solve the linear equation:  $Sb = v$ , where  $S$  is the cell-type by cCRE signature matrix,  
1222  $b$  is a column vector containing fractions of 54 cell-types, and  $v$  is the bulk chromatin accessibility  
1223 scores of 19,591 signature cCREs. We applied two different algorithms, non-negative least  
1224 squares (NNLS) and support vector regression (SVR), for solving the equations. We found that  
1225 the two algorithms show comparable performance while SVR performs a little better than NNLS.

1226

1227 **GWAS variant enrichment**

1228 We used linkage disequilibrium (LD) score regression (Bulik-Sullivan et al., 2015) v1.0.1 to  
1229 estimate genome-wide GWAS enrichment for disease and non-disease phenotypes within cell  
1230 type resolved cCREs (peaks called on each cell cluster via MACS2 (Zhang et al., 2008) using the  
1231 above parameters). We compiled published GWAS summary statistics for complex diseases  
1232 (Bentham et al., 2015; Bronson et al., 2016; Consortium, 2019; Cordell et al., 2015; Jansen et al.,  
1233 2019; Ji et al., 2017; Jin et al., 2016; Luo et al., 2017b; Mahajan et al., 2018; Malik et al., 2018;  
1234 Michailidou et al., 2017; Nielsen et al., 2018; Nikpay et al., 2015; Okada et al., 2014; Paternoster  
1235 et al., 2015; Pividori et al., 2019; Sakornsakolpat et al., 2019; Schafmayer et al., 2019; Shadrina  
1236 et al., 2019; Tachmazidou et al., 2019; Tin et al., 2019; Watanabe et al., 2019; Wiberg et al., 2019;  
1237 Wuttke et al., 2019) and endophenotypes (Astle et al., 2016; Hoffmann et al., 2018; Kemp et al.,  
1238 2017; Kilpeläinen et al., 2016; Manning et al., 2012; Saxena et al., 2010; Shrine et al., 2019;  
1239 Strawbridge et al., 2011; Teumer et al., 2018; Warrington et al., 2019) within European  
1240 populations. Using cell type resolved cCREs as a binary annotation, we created custom  
1241 partitioned LD score files by following the steps outlined in the LD score estimation tutorial. As  
1242 background annotations, we included all baseline annotations in the baseline-LD model v2.2 as  
1243 well as partitioned LD scores created from all merged cCREs. For each trait, we used LD score  
1244 regression to then estimate coefficient z-scores for each cell type relative to the background  
1245 annotations. We used the coefficient z-scores to compute one-sided p-values and used the  
1246 Benjamini-Hochberg procedure to correct for multiple tests.

1247

1248 **Fine mapping**

1249 We performed genetic fine mapping for GWAS of diseases and endophenotypes that had  
1250 sufficient coverage (i.e., were at least imputed into 1000 Genomes). For GWAS with available  
1251 fine mapping data, we took 99% credible sets directly from the supplemental tables. For GWAS  
1252 without available fine mapping data, we calculated approximate Bayes factors (Wakefield, 2009)  
1253 (ABF) for each variant assuming prior variance  $\omega = 0.04$ . For every trait, we obtained index  
1254 variants for each locus from the supplemental tables of the respective study. We extracted all  
1255 variants in at least low linkage disequilibrium ( $r^2 > 0.1$  using the European subset of 1000  
1256 Genomes Phase 3 (Auton et al., 2015)) in a large window ( $\pm 2.5$  Mb) around each index variant.  
1257 We calculated posterior probabilities of association (PPA) for each variant by dividing its ABF by  
1258 the cumulative ABF for all variants within the locus. We then defined 99% credible sets for each  
1259 locus by sorting variants by descending PPA and keeping variants adding up to a cumulative PPA  
1260 of 0.99.

1261

### 1262 **Predicting the effects of non-coding variants on TF binding**

1263 To identify SNPs that affect TF binding, we employed deltaSVM models as described previously  
1264 (Yan et al., 2021). Briefly, 40 bp sequences centered on each SNP were used as input to 94  
1265 previously trained and validated TF models. For each SNP, we predicted the binding scores for  
1266 both alleles by running "gkmpredict". A SNP is considered to be bound if the binding score passes  
1267 the pre-defined threshold for either allele. Among those SNPs, deltaSVM scores were calculated  
1268 using the "deltasvm.pl" script and SNPs with deltaSVM scores passing the threshold for the  
1269 corresponding model are predicted to affect TF binding.

1270

### 1271 **DATA AND SOFTWARE AVAILABILITY**

1272 The GEO accession number for the sequencing data and processed data files in this paper is  
1273 GSE165659.

1274

1275 **REFERENCES**

- 1276
- 1277 Andersson, R., Gebhard, C., Miguel-Escalada, I., Hoof, I., Bornholdt, J., Boyd, M., Chen, Y.,  
1278 Zhao, X., Schmidl, C., Suzuki, T., *et al.* (2014). An atlas of active enhancers across human cell  
1279 types and tissues. *Nature* 507, 455-461.
- 1280 Astle, W.J., Elding, H., Jiang, T., Allen, D., Ruklisa, D., Mann, A.L., Mead, D., Bouman, H.,  
1281 Riveros-Mckay, F., Kostadima, M.A., *et al.* (2016). The Allelic Landscape of Human Blood Cell  
1282 Trait Variation and Links to Common Complex Disease. *Cell* 167, 1415-1429.e1419.
- 1283 Auton, A., Brooks, L.D., Durbin, R.M., Garrison, E.P., Kang, H.M., Korbel, J.O., Marchini, J.L.,  
1284 McCarthy, S., McVean, G.A., and Abecasis, G.R. (2015). A global reference for human genetic  
1285 variation. *Nature* 526, 68-74.
- 1286 Bentham, J., Morris, D.L., Graham, D.S.C., Pinder, C.L., Tomblason, P., Behrens, T.W., Martín,  
1287 J., Fairfax, B.P., Knight, J.C., Chen, L., *et al.* (2015). Genetic association analyses implicate  
1288 aberrant regulation of innate and adaptive immunity genes in the pathogenesis of systemic  
1289 lupus erythematosus. *Nat Genet* 47, 1457-1464.
- 1290 Berger, A.C., Korkut, A., Kanchi, R.S., Hegde, A.M., Lenoir, W., Liu, W., Liu, Y., Fan, H., Shen,  
1291 H., Ravikumar, V., *et al.* (2018). A Comprehensive Pan-Cancer Molecular Study of Gynecologic  
1292 and Breast Cancers. *Cancer Cell* 33, 690-705.e699.
- 1293 Bingle, C.D. (1997). Thyroid transcription factor-1. *Int J Biochem Cell Biol* 29, 1471-1473.
- 1294 Black, A.R., Black, J.D., and Azizkhan-Clifford, J. (2001). Sp1 and krüppel-like factor family of  
1295 transcription factors in cell growth regulation and cancer. *Journal of Cellular Physiology* 188,  
1296 143-160.
- 1297 Blum, M., Gaunt, S.J., Cho, K.W.Y., Steinbeisser, H., Blumberg, B., Bittner, D., and De  
1298 Robertis, E.M. (1992). Gastrulation in the mouse: The role of the homeobox gene goosecoid.  
1299 *Cell* 69, 1097-1106.
- 1300 Bohinski, R.J., Di Lauro, R., and Whitsett, J.A. (1994). The lung-specific surfactant protein B  
1301 gene promoter is a target for thyroid transcription factor 1 and hepatocyte nuclear factor 3,  
1302 indicating common factors for organ-specific gene expression along the foregut axis. *Mol Cell*  
1303 *Biol* 14, 5671-5681.
- 1304 Bouneffouf, D., and Birol, I. (2016). Theoretical analysis of the Minimum Sum of Squared  
1305 Similarities sampling for Nyström-based spectral clustering. In 2016 International Joint  
1306 Conference on Neural Networks (IJCNN), pp. 3856-3862.
- 1307 Bronson, P.G., Chang, D., Bhangale, T., Seldin, M.F., Ortmann, W., Ferreira, R.C., Urcelay, E.,  
1308 Pereira, L.F., Martin, J., Plebani, A., *et al.* (2016). Common variants at PVT1, ATG13-AMBRA1,  
1309 AH11 and CLEC16A are associated with selective IgA deficiency. *Nat Genet* 48, 1425-1429.



1310 Buenrostro, J.D., Giresi, P.G., Zaba, L.C., Chang, H.Y., and Greenleaf, W.J. (2013).  
1311 Transposition of native chromatin for fast and sensitive epigenomic profiling of open chromatin,  
1312 DNA-binding proteins and nucleosome position. *Nat Methods* 10, 1213-1218.

1313 Bulik-Sullivan, B.K., Loh, P.-R., Finucane, H.K., Ripke, S., Yang, J., Patterson, N., Daly, M.J.,  
1314 Price, A.L., Neale, B.M., and Schizophrenia Working Group of the Psychiatric Genomics, C.  
1315 (2015). LD Score regression distinguishes confounding from polygenicity in genome-wide  
1316 association studies. *Nature Genetics* 47, 291-295.

1317 Cancer Genome Atlas Research, N., Weinstein, J.N., Collisson, E.A., Mills, G.B., Shaw, K.R.M.,  
1318 Ozenberger, B.A., Ellrott, K., Shmulevich, I., Sander, C., and Stuart, J.M. (2013). The Cancer  
1319 Genome Atlas Pan-Cancer analysis project. *Nature genetics* 45, 1113-1120.

1320 Carithers, L.J., Ardlie, K., Barcus, M., Branton, P.A., Britton, A., Buia, S.A., Compton, C.C.,  
1321 DeLuca, D.S., Peter-Demchok, J., Gelfand, E.T., *et al.* (2015). A Novel Approach to High-  
1322 Quality Postmortem Tissue Procurement: The GTEx Project. *Biopreserv Biobank* 13, 311-319.

1323 Carter, B., and Zhao, K. (2020). The epigenetic basis of cellular heterogeneity. *Nature Reviews*  
1324 *Genetics*.

1325 Chal, J., and Pourquié, O. (2017). Making muscle: skeletal myogenesis *in vivo* and  
1326 *in vitro*. *Development* 144, 2104-2122.

1327 Chang, H.Y., Chi, J.T., Dudoit, S., Bondre, C., van de Rijn, M., Botstein, D., and Brown, P.O.  
1328 (2002). Diversity, topographic differentiation, and positional memory in human fibroblasts. *Proc*  
1329 *Natl Acad Sci U S A* 99, 12877-12882.

1330 Chen, H., Lareau, C., Andreani, T., Vinyard, M.E., Garcia, S.P., Clement, K., Andrade-Navarro,  
1331 M.A., Buenrostro, J.D., and Pinello, L. (2019). Assessment of computational methods for the  
1332 analysis of single-cell ATAC-seq data. *Genome Biology* 20, 241.

1333 Chiou, J., Zeng, C., Cheng, Z., Han, J.Y., Schlichting, M., Huang, S., Wang, J., Sui, Y.,  
1334 Deogaygay, A., Okino, M.-L., *et al.* (2019). Single cell chromatin accessibility reveals pancreatic  
1335 islet cell type- and state-specific regulatory programs of diabetes risk. *bioRxiv*, 693671.

1336 Clausnitzer, M., Cho, J.H., Collins, R., Cox, N.J., Dermitzakis, E.T., Hurles, M.E., Kathiresan,  
1337 S., Kenny, E.E., Lindgren, C.M., MacArthur, D.G., *et al.* (2020). A brief history of human disease  
1338 genetics. *Nature* 577, 179-189.

1339 Consortium, G. (2020). The GTEx Consortium atlas of genetic regulatory effects across human  
1340 tissues. *Science* 369, 1318.

1341 Consortium, I.M.S.G. (2019). Multiple sclerosis genomic map implicates peripheral immune cells  
1342 and microglia in susceptibility. *Science* 365.

1343 Corces, M.R., Granja, J.M., Shams, S., Louie, B.H., Seoane, J.A., Zhou, W., Silva, T.C.,  
1344 Groeneveld, C., Wong, C.K., Cho, S.W., *et al.* (2018). The chromatin accessibility landscape of  
1345 primary human cancers. *Science* 362, eaav1898.

1346 Corces, M.R., Shcherbina, A., Kundu, S., Gloudemans, M.J., Frésard, L., Granja, J.M., Louie,  
1347 B.H., Eulalio, T., Shams, S., Bagdatli, S.T., *et al.* (2020). Single-cell epigenomic analyses  
1348 implicate candidate causal variants at inherited risk loci for Alzheimer's and Parkinson's  
1349 diseases. *Nat Genet* 52, 1158-1168.

1350 Cordell, H.J., Han, Y., Mells, G.F., Li, Y., Hirschfield, G.M., Greene, C.S., Xie, G., Juran, B.D.,  
1351 Zhu, D., Qian, D.C., *et al.* (2015). International genome-wide meta-analysis identifies new  
1352 primary biliary cirrhosis risk loci and targetable pathogenic pathways. *Nat Commun* 6, 8019.

1353 Cusanovich, D.A., Daza, R., Adey, A., Pliner, H.A., Christiansen, L., Gunderson, K.L.,  
1354 Steemers, F.J., Trapnell, C., and Shendure, J. (2015). Multiplex single-cell profiling of chromatin  
1355 accessibility by combinatorial cellular indexing. *Science* 348, 910.

1356 Cusanovich, D.A., Hill, A.J., Aghamirzaie, D., Daza, R.M., Pliner, H.A., Berletch, J.B., Filippova,  
1357 G.N., Huang, X., Christiansen, L., DeWitt, W.S., *et al.* (2018). A Single-Cell Atlas of In Vivo  
1358 Mammalian Chromatin Accessibility. *Cell* 174, 1309-1324.e1318.

1359 Domcke, S., Hill, A.J., Daza, R.M., Cao, J., O'Day, D.R., Pliner, H.A., Aldinger, K.A., Pokholok,  
1360 D., Zhang, F., Milbank, J.H., *et al.* (2020). A human cell atlas of fetal chromatin accessibility.  
1361 *Science* 370, eaba7612.

1362 Ernst, J., Kheradpour, P., Mikkelsen, T.S., Shoresh, N., Ward, L.D., Epstein, C.B., Zhang, X.,  
1363 Wang, L., Issner, R., Coyne, M., *et al.* (2011). Mapping and analysis of chromatin state  
1364 dynamics in nine human cell types. *Nature* 473, 43-49.

1365 Fang, R., Preissl, S., Li, Y., Hou, X., Lucero, J., Wang, X., Motamedi, A., Shiao, A.K., Zhou, X.,  
1366 Xie, F., *et al.* (2020). SnapATAC: A Comprehensive Analysis Package for Single Cell ATAC-  
1367 seq. *bioRxiv*, 615179.

1368 Frankish, A., Diekhans, M., Ferreira, A.M., Johnson, R., Jungreis, I., Loveland, J., Mudge, J.M.,  
1369 Sisu, C., Wright, J., Armstrong, J., *et al.* (2019). GENCODE reference annotation for the human  
1370 and mouse genomes. *Nucleic Acids Res* 47, D766-D773.

1371 Franzén, O., Gan, L.-M., and Björkegren, J. (2019). PanglaoDB: a web server for exploration of  
1372 mouse and human single-cell RNA sequencing data. *Database The Journal of Biological*  
1373 *Databases and Curation* 2019, 46.

1374 Fulco, C.P., Nasser, J., Jones, T.R., Munson, G., Bergman, D.T., Subramanian, V., Grossman,  
1375 S.R., Anyoha, R., Patwardhan, T.A., Nguyen, T.H., *et al.* (2019). Activity-by-Contact model of  
1376 enhancer specificity from thousands of CRISPR perturbations. *bioRxiv*, 529990.

- 1377 Furtado, M.B., Costa, M.W., Pranoto, E.A., Salimova, E., Pinto, A.R., Lam, N.T., Park, A.,  
1378 Snider, P., Chandran, A., Harvey, R.P., *et al.* (2014). Cardiogenic genes expressed in cardiac  
1379 fibroblasts contribute to heart development and repair. *Circ Res* 114, 1422-1434.
- 1380 Gingras, M.C., Lapillonne, H., and Margolin, J.F. (2001). CFFM4: a new member of the  
1381 CD20/FcepsilonRIbeta family. *Immunogenetics* 53, 468-476.
- 1382 Golson, M.L., and Kaestner, K.H. (2016). Fox transcription factors: from development to  
1383 disease. *Development* 143, 4558-4570.
- 1384 Grosselin, K., Durand, A., Marsolier, J., Poitou, A., Marangoni, E., Nemati, F., Dahmani, A.,  
1385 Lameiras, S., Reyat, F., Frenoy, O., *et al.* (2019). High-throughput single-cell ChIP-seq identifies  
1386 heterogeneity of chromatin states in breast cancer. *Nat Genet* 51, 1060-1066.
- 1387 Gupta, S., Stamatoyannopoulos, J.A., Bailey, T.L., and Noble, W.S. (2007). Quantifying  
1388 similarity between motifs. *Genome Biology* 8, R24.
- 1389 Haghverdi, L., Lun, A.T.L., Morgan, M.D., and Marioni, J.C. (2018). Batch effects in single-cell  
1390 RNA-sequencing data are corrected by matching mutual nearest neighbors. *Nat Biotechnol* 36,  
1391 421-427.
- 1392 Han, X., Zhou, Z., Fei, L., Sun, H., Wang, R., Chen, Y., Chen, H., Wang, J., Tang, H., Ge, W., *et al.*  
1393 *et al.* (2020). Construction of a human cell landscape at single-cell level. *Nature* 581, 303-309.
- 1394 Harries, L.W., Pilling, L.C., Hernandez, L.D.G., Bradley-Smith, R., Henley, W., Singleton, A.B.,  
1395 Guralnik, J.M., Bandinelli, S., Ferrucci, L., and Melzer, D. (2012). CCAAT-enhancer-binding  
1396 protein-beta expression in vivo is associated with muscle strength. *Aging Cell* 11, 262-268.
- 1397 Heinz, S., Benner, C., Spann, N., Bertolino, E., Lin, Y.C., Laslo, P., Cheng, J.X., Murre, C.,  
1398 Singh, H., and Glass, C.K. (2010). Simple combinations of lineage-determining transcription  
1399 factors prime cis-regulatory elements required for macrophage and B cell identities. *Mol Cell* 38,  
1400 576-589.
- 1401 Hocker, J.D., Poirion, O.B., Zhu, F., Buchanan, J., Zhang, K., Chiou, J., Wang, T.-M., Hou, X.,  
1402 Li, Y.E., Zhang, Y., *et al.* (2020). Cardiac Cell Type-Specific Gene Regulatory Programs and  
1403 Disease Risk Association. *bioRxiv*, 2020.2009.2011.291724.
- 1404 Hoffmann, T.J., Theusch, E., Haldar, T., Ranatunga, D.K., Jorgenson, E., Medina, M.W., Kvale,  
1405 M.N., Kwok, P.Y., Schaefer, C., Krauss, R.M., *et al.* (2018). A large electronic-health-record-  
1406 based genome-wide study of serum lipids. *Nat Genet* 50, 401-413.
- 1407 Hu, E., Liang, P., and Spiegelman, B.M. (1996). AdipoQ is a novel adipose-specific gene  
1408 dysregulated in obesity. *J Biol Chem* 271, 10697-10703.
- 1409 Huber, R., Pietsch, D., Panterodt, T., and Brand, K. (2012). Regulation of C/EBP $\beta$  and resulting  
1410 functions in cells of the monocytic lineage. *Cellular Signalling* 24, 1287-1296.

1411 Izpisúa-Belmonte, J.C., De Robertis, E.M., Storey, K.G., and Stern, C.D. (1993). The homeobox  
1412 gene goosecoid and the origin of organizer cells in the early chick blastoderm. *Cell* 74, 645-659.

1413 Jansen, I.E., Savage, J.E., Watanabe, K., Bryois, J., Williams, D.M., Steinberg, S., Sealock, J.,  
1414 Karlsson, I.K., Hägg, S., Athanasiu, L., *et al.* (2019). Genome-wide meta-analysis identifies new  
1415 loci and functional pathways influencing Alzheimer's disease risk. *Nat Genet* 51, 404-413.

1416 Jedlicka, P., Sui, X., Sussel, L., and Gutierrez-Hartmann, A. (2009). Ets transcription factors  
1417 control epithelial maturation and transit and crypt-villus morphogenesis in the mammalian  
1418 intestine. *Am J Pathol* 174, 1280-1290.

1419 Ji, S.G., Juran, B.D., Mucha, S., Folseraas, T., Jostins, L., Melum, E., Kumasaka, N., Atkinson,  
1420 E.J., Schlicht, E.M., Liu, J.Z., *et al.* (2017). Genome-wide association study of primary  
1421 sclerosing cholangitis identifies new risk loci and quantifies the genetic relationship with  
1422 inflammatory bowel disease. *Nat Genet* 49, 269-273.

1423 Jin, Y., Andersen, G., Yorgov, D., Ferrara, T.M., Ben, S., Brownson, K.M., Holland, P.J., Birlea,  
1424 S.A., Siebert, J., Hartmann, A., *et al.* (2016). Genome-wide association studies of autoimmune  
1425 vitiligo identify 23 new risk loci and highlight key pathways and regulatory variants. *Nat Genet*  
1426 48, 1418-1424.

1427 John, S., Sabo, P.J., Canfield, T.K., Lee, K., Vong, S., Weaver, M., Wang, H., Vierstra, J.,  
1428 Reynolds, A.P., Thurman, R.E., *et al.* (2013). Genome-Scale Mapping of DNase I  
1429 Hypersensitivity. *Current Protocols in Molecular Biology* 103, 21.27.21-21.27.20.

1430 Jung, I., Schmitt, A., Diao, Y., Lee, A.J., Liu, T., Yang, D., Tan, C., Eom, J., Chan, M., Chee, S.,  
1431 *et al.* (2019). A compendium of promoter-centered long-range chromatin interactions in the  
1432 human genome. *Nat Genet* 51, 1442-1449.

1433 Kemp, J.P., Morris, J.A., Medina-Gomez, C., Forgetta, V., Warrington, N.M., Youlten, S.E.,  
1434 Zheng, J., Gregson, C.L., Grundberg, E., Trajanoska, K., *et al.* (2017). Identification of 153 new  
1435 loci associated with heel bone mineral density and functional involvement of GPC6 in  
1436 osteoporosis. *Nat Genet* 49, 1468-1475.

1437 Kilpeläinen, T.O., Carli, J.F., Skowronski, A.A., Sun, Q., Kriebel, J., Feitosa, M.F., Hedman Å,  
1438 K., Drong, A.W., Hayes, J.E., Zhao, J., *et al.* (2016). Genome-wide meta-analysis uncovers  
1439 novel loci influencing circulating leptin levels. *Nat Commun* 7, 10494.

1440 Klein, A.M., Mazutis, L., Akartuna, I., Tallapragada, N., Veres, A., Li, V., Peshkin, L., Weitz,  
1441 D.A., and Kirschner, M.W. (2015). Droplet barcoding for single-cell transcriptomics applied to  
1442 embryonic stem cells. *Cell* 161, 1187-1201.

1443 Klemm, S.L., Shipony, Z., and Greenleaf, W.J. (2019). Chromatin accessibility and the  
1444 regulatory epigenome. *Nature Reviews Genetics* 20, 207-220.

1445 Kojima, M., Hosoda, H., Date, Y., Nakazato, M., Matsuo, H., and Kangawa, K. (1999). Ghrelin is  
1446 a growth-hormone-releasing acylated peptide from stomach. *Nature* 402, 656-660.

1447 Kundaje, A., Meuleman, W., Ernst, J., Bilenky, M., Yen, A., Heravi-Moussavi, A., Kheradpour,  
1448 P., Zhang, Z., Wang, J., Ziller, M.J., *et al.* (2015). Integrative analysis of 111 reference human  
1449 epigenomes. *Nature* 518, 317-330.

1450 Lake, B.B., Chen, S., Sos, B.C., Fan, J., Kaeser, G.E., Yung, Y.C., Duong, T.E., Gao, D., Chun,  
1451 J., Kharchenko, P.V., *et al.* (2018). Integrative single-cell analysis of transcriptional and  
1452 epigenetic states in the human adult brain. *Nat Biotechnol* 36, 70-80.

1453 Lareau, C.A., Duarte, F.M., Chew, J.G., Kartha, V.K., Burkett, Z.D., Kohlway, A.S., Pokholok,  
1454 D., Aryee, M.J., Steemers, F.J., Lebofsky, R., *et al.* (2019). Droplet-based combinatorial  
1455 indexing for massive-scale single-cell chromatin accessibility. *Nature Biotechnology* 37, 916-  
1456 924.

1457 Li, Y.E., Preissl, S., Hou, X., Zhang, Z., Zhang, K., Fang, R., Qiu, Y., Poirion, O., Li, B., Liu, H.,  
1458 *et al.* (2020). An Atlas of Gene Regulatory Elements in Adult Mouse Cerebrum. *bioRxiv*,  
1459 2020.2005.2010.087585.

1460 Luo, C., Keown, C.L., Kurihara, L., Zhou, J., He, Y., Li, J., Castanon, R., Lucero, J., Nery, J.R.,  
1461 Sandoval, J.P., *et al.* (2017a). Single-cell methylomes identify neuronal subtypes and regulatory  
1462 elements in mammalian cortex. *Science* 357, 600-604.

1463 Luo, Y., de Lange, K.M., Jostins, L., Moutsianas, L., Randall, J., Kennedy, N.A., Lamb, C.A.,  
1464 McCarthy, S., Ahmad, T., Edwards, C., *et al.* (2017b). Exploring the genetic architecture of  
1465 inflammatory bowel disease by whole-genome sequencing identifies association at ADCY7. *Nat*  
1466 *Genet* 49, 186-192.

1467 Macosko, E.Z., Basu, A., Satija, R., Nemesh, J., Shekhar, K., Goldman, M., Tirosh, I., Bialas,  
1468 A.R., Kamitaki, N., Martersteck, E.M., *et al.* (2015). Highly Parallel Genome-wide Expression  
1469 Profiling of Individual Cells Using Nanoliter Droplets. *Cell* 161, 1202-1214.

1470 Mahajan, A., Taliun, D., Thurner, M., Robertson, N.R., Torres, J.M., Rayner, N.W., Payne, A.J.,  
1471 Steinthorsdottir, V., Scott, R.A., Grarup, N., *et al.* (2018). Fine-mapping type 2 diabetes loci to  
1472 single-variant resolution using high-density imputation and islet-specific epigenome maps. *Nat*  
1473 *Genet* 50, 1505-1513.

1474 Malik, R., Chauhan, G., Traylor, M., Sargurupremraj, M., Okada, Y., Mishra, A., Rutten-Jacobs,  
1475 L., Giese, A.K., van der Laan, S.W., Gretarsdottir, S., *et al.* (2018). Multiancestry genome-wide  
1476 association study of 520,000 subjects identifies 32 loci associated with stroke and stroke  
1477 subtypes. *Nat Genet* 50, 524-537.

1478 Manning, A.K., Hivert, M.F., Scott, R.A., Grimsby, J.L., Bouatia-Naji, N., Chen, H., Rybin, D.,  
1479 Liu, C.T., Bielak, L.F., Prokopenko, I., *et al.* (2012). A genome-wide approach accounting for  
1480 body mass index identifies genetic variants influencing fasting glycemic traits and insulin  
1481 resistance. *Nat Genet* 44, 659-669.

1482 Marchildon, F., Fu, D., Lala-Tabbert, N., and Wiper-Bergeron, N. (2016). CCAAT/enhancer  
1483 binding protein beta protects muscle satellite cells from apoptosis after injury and in cancer  
1484 cachexia. *Cell Death & Disease* 7, e2109-e2109.

1485 Mary Elizabeth Pownall, Marcus K. Gustafsson, and Charles P. Emerson, J. (2002). Myogenic  
1486 Regulatory Factors and the Specification of Muscle Progenitors in Vertebrate Embryos. *Annual*  
1487 *Review of Cell and Developmental Biology* 18, 747-783.

1488 Maurano, M.T., Humbert, R., Rynes, E., Thurman, R.E., Haugen, E., Wang, H., Reynolds, A.P.,  
1489 Sandstrom, R., Qu, H., Brody, J., *et al.* (2012). Systematic localization of common disease-  
1490 associated variation in regulatory DNA. *Science* 337, 1190-1195.

1491 McConnell, B.B., and Yang, V.W. (2010). Mammalian Krüppel-like factors in health and  
1492 diseases. *Physiol Rev* 90, 1337-1381.

1493 McLean, C.Y., Bristor, D., Hiller, M., Clarke, S.L., Schaar, B.T., Lowe, C.B., Wenger, A.M., and  
1494 Bejerano, G. (2010). GREAT improves functional interpretation of cis-regulatory regions. *Nat*  
1495 *Biotechnol* 28, 495-501.

1496 Meuleman, W., Muratov, A., Rynes, E., Halow, J., Lee, K., Bates, D., Diegel, M., Dunn, D., Neri,  
1497 F., Teodosiadis, A., *et al.* (2020). Index and biological spectrum of human DNase I  
1498 hypersensitive sites. *Nature* 584, 244-251.

1499 Michailidou, K., Lindström, S., Dennis, J., Beesley, J., Hui, S., Kar, S., Lemaçon, A., Soucy, P.,  
1500 Glubb, D., Rostamianfar, A., *et al.* (2017). Association analysis identifies 65 new breast cancer  
1501 risk loci. *Nature* 551, 92-94.

1502 Moore, J.E., Purcaro, M.J., Pratt, H.E., Epstein, C.B., Shores, N., Adrian, J., Kawli, T., Davis,  
1503 C.A., Dobin, A., Kaul, R., *et al.* (2020). Expanded encyclopaedias of DNA elements in the  
1504 human and mouse genomes. *Nature* 583, 699-710.

1505 Muhl, L., Genove, G., Leptidis, S., Liu, J., He, L., Mocci, G., Sun, Y., Gustafsson, S.,  
1506 Buyandelger, B., Chivukula, I.V., *et al.* (2020). Single-cell analysis uncovers fibroblast  
1507 heterogeneity and criteria for fibroblast and mural cell identification and discrimination. *Nat*  
1508 *Commun* 11, 3953.

1509 Nasser, J., Bergman, D.T., Fulco, C.P., Guckelberger, P., Doughty, B.R., Patwardhan, T.A.,  
1510 Jones, T.R., Nguyen, T.H., Ulirsch, J.C., Natri, H.M., *et al.* (2020). Genome-wide maps of  
1511 enhancer regulation connect risk variants to disease genes. *bioRxiv*, 2020.2009.2001.278093.

- 1512 Niehrs, C., Keller, R., Cho, K.W.Y., and De Robertis, E.M. (1993). The homeobox gene  
1513 gooseoid controls cell migration in *Xenopus* embryos. *Cell* 72, 491-503.
- 1514 Nielsen, J.B., Thorolfsdottir, R.B., Fritsche, L.G., Zhou, W., Skov, M.W., Graham, S.E., Herron,  
1515 T.J., McCarthy, S., Schmidt, E.M., Sveinbjornsson, G., *et al.* (2018). Biobank-driven genomic  
1516 discovery yields new insight into atrial fibrillation biology. *Nat Genet* 50, 1234-1239.
- 1517 Nikpay, M., Goel, A., Won, H.H., Hall, L.M., Willenborg, C., Kanoni, S., Saleheen, D., Kyriakou,  
1518 T., Nelson, C.P., Hopewell, J.C., *et al.* (2015). A comprehensive 1,000 Genomes-based  
1519 genome-wide association meta-analysis of coronary artery disease. *Nat Genet* 47, 1121-1130.
- 1520 Nott, A., Holtman, I.R., Coufal, N.G., Schlachetzki, J.C.M., Yu, M., Hu, R., Han, C.Z., Pena, M.,  
1521 Xiao, J., Wu, Y., *et al.* (2019). Brain cell type-specific enhancer-promoter interactome maps and  
1522 disease-risk association. *Science* 366, 1134-1139.
- 1523 Okada, Y., Wu, D., Trynka, G., Raj, T., Terao, C., Ikari, K., Kochi, Y., Ohmura, K., Suzuki, A.,  
1524 Yoshida, S., *et al.* (2014). Genetics of rheumatoid arthritis contributes to biology and drug  
1525 discovery. *Nature* 506, 376-381.
- 1526 Parry, D.A., Logan, C.V., Stegmann, A.P.A., Abdelhamed, Z.A., Calder, A., Khan, S., Bonthron,  
1527 D.T., Clowes, V., Sheridan, E., Ghali, N., *et al.* (2013). SAMS, a syndrome of short stature,  
1528 auditory-canal atresia, mandibular hypoplasia, and skeletal abnormalities is a unique  
1529 neurocristopathy caused by mutations in *Gooseoid*. *Am J Hum Genet* 93, 1135-1142.
- 1530 Paternoster, L., Standl, M., Waage, J., Baurecht, H., Hotze, M., Strachan, D.P., Curtin, J.A.,  
1531 Bønnelykke, K., Tian, C., Takahashi, A., *et al.* (2015). Multi-ancestry genome-wide association  
1532 study of 21,000 cases and 95,000 controls identifies new risk loci for atopic dermatitis. *Nat*  
1533 *Genet* 47, 1449-1456.
- 1534 Perrino, C., and Rockman, H.A. (2006). *GATA4* and the Two Sides of Gene Expression  
1535 Reprogramming. *Circ Res* 98, 715-716.
- 1536 Pividori, M., Schoettler, N., Nicolae, D.L., Ober, C., and Im, H.K. (2019). Shared and distinct  
1537 genetic risk factors for childhood-onset and adult-onset asthma: genome-wide and  
1538 transcriptome-wide studies. *Lancet Respir Med* 7, 509-522.
- 1539 Pliner, H.A., Packer, J.S., McFaline-Figueroa, J.L., Cusanovich, D.A., Daza, R.M., Aghamirzaie,  
1540 D., Srivatsan, S., Qiu, X., Jackson, D., Minkina, A., *et al.* (2018). Cicero Predicts cis-Regulatory  
1541 DNA Interactions from Single-Cell Chromatin Accessibility Data. *Mol Cell* 71, 858-871.e858.
- 1542 Pollard, K.S., Hubisz, M.J., Rosenbloom, K.R., and Siepel, A. (2010). Detection of nonneutral  
1543 substitution rates on mammalian phylogenies. *Genome Res* 20, 110-121.
- 1544 Preissl, S., Fang, R., Huang, H., Zhao, Y., Raviram, R., Gorkin, D.U., Zhang, Y., Sos, B.C.,  
1545 Afzal, V., Dickel, D.E., *et al.* (2018). Single-nucleus analysis of accessible chromatin in

1546 developing mouse forebrain reveals cell-type-specific transcriptional regulation. *Nat Neurosci*  
1547 *21*, 432-439.

1548 Roadmap Epigenomics, C., Kundaje, A., Meuleman, W., Ernst, J., Bilenky, M., Yen, A., Heravi-  
1549 Moussavi, A., Kheradpour, P., Zhang, Z., Wang, J., *et al.* (2015). Integrative analysis of 111  
1550 reference human epigenomes. *Nature* *518*, 317-330.

1551 Roy, N., and Roy, S. (2016). Histogenesis of gastric mucosa in human fetal stomach. *National*  
1552 *Journal of Clinical Anatomy* *5*, 70-77.

1553 Ruffell, D., Mourkioti, F., Gambardella, A., Kirstetter, P., Lopez, R.G., Rosenthal, N., and Nerlov,  
1554 C. (2009). A CREB-C/EBPbeta cascade induces M2 macrophage-specific gene expression and  
1555 promotes muscle injury repair. *Proceedings of the National Academy of Sciences of the United*  
1556 *States of America* *106*, 17475-17480.

1557 Sakornsakolpat, P., Prokopenko, D., Lamontagne, M., Reeve, N.F., Guyatt, A.L., Jackson, V.E.,  
1558 Shrine, N., Qiao, D., Bartz, T.M., Kim, D.K., *et al.* (2019). Genetic landscape of chronic  
1559 obstructive pulmonary disease identifies heterogeneous cell-type and phenotype associations.  
1560 *Nat Genet* *51*, 494-505.

1561 Salem, S., Salem, D., and Gros, P. (2020). Role of IRF8 in immune cells functions, protection  
1562 against infections, and susceptibility to inflammatory diseases. *Human Genetics* *139*, 707-721.

1563 Saxena, R., Hivert, M.F., Langenberg, C., Tanaka, T., Pankow, J.S., Vollenweider, P.,  
1564 Lyssenko, V., Bouatia-Naji, N., Dupuis, J., Jackson, A.U., *et al.* (2010). Genetic variation in  
1565 GIPR influences the glucose and insulin responses to an oral glucose challenge. *Nat Genet* *42*,  
1566 142-148.

1567 Schafmayer, C., Harrison, J.W., Buch, S., Lange, C., Reichert, M.C., Hofer, P., Cossais, F.,  
1568 Kupcinkas, J., von Schönfels, W., Schniewind, B., *et al.* (2019). Genome-wide association  
1569 analysis of diverticular disease points towards neuromuscular, connective tissue and epithelial  
1570 pathomechanisms. *Gut* *68*, 854-865.

1571 Schiaffino, S., and Reggiani, C. (2011). Fiber types in mammalian skeletal muscles. *Physiol Rev*  
1572 *91*, 1447-1531.

1573 Schiaffino, S., Rossi, A.C., Smerdu, V., Leinwand, L.A., and Reggiani, C. (2015).  
1574 Developmental myosins: expression patterns and functional significance. *Skelet Muscle* *5*, 22-  
1575 22.

1576 Schug, J., Schuller, W.P., Kappen, C., Salbaum, J.M., Bucan, M., and Stoeckert, C.J., Jr.  
1577 (2005). Promoter features related to tissue specificity as measured by Shannon entropy.  
1578 *Genome Biol* *6*, R33.



1579 Shadrina, A.S., Sharapov, S.Z., Shashkova, T.I., and Tsepilov, Y.A. (2019). Varicose veins of  
1580 lower extremities: Insights from the first large-scale genetic study. *PLoS Genet* 15, e1008110.

1581 Shen, T., Aneas, I., Sakabe, N., Dirschinger, R.J., Wang, G., Smemo, S., Westlund, J.M.,  
1582 Cheng, H., Dalton, N., Gu, Y., *et al.* (2011). *Tbx20* regulates a genetic program essential to  
1583 adult mouse cardiomyocyte function. *The Journal of Clinical Investigation* 121, 4640-4654.

1584 Shen, Y., Yue, F., McCleary, D.F., Ye, Z., Edsall, L., Kuan, S., Wagner, U., Dixon, J., Lee, L.,  
1585 Lobanenkov, V.V., *et al.* (2012). A map of the cis-regulatory sequences in the mouse genome.  
1586 *Nature* 488, 116-120.

1587 Shlyueva, D., Stampfel, G., and Stark, A. (2014). Transcriptional enhancers: from properties to  
1588 genome-wide predictions. *Nat Rev Genet* 15, 272-286.

1589 Shrikumar, A., Tian, K., Shcherbina, A., Avsec, Z., Banerjee, A., Sharmin, M., Nair, S., and  
1590 Kundaje, A. (2018). Technical Note on Transcription Factor Motif Discovery from Importance  
1591 Scores (TF-MoDISco) version 0.5.6.5. arXiv.

1592 Shrine, N., Guyatt, A.L., Erzurumluoglu, A.M., Jackson, V.E., Hobbs, B.D., Melbourne, C.A.,  
1593 Batini, C., Fawcett, K.A., Song, K., Sakornsakolpat, P., *et al.* (2019). New genetic signals for  
1594 lung function highlight pathways and chronic obstructive pulmonary disease associations across  
1595 multiple ancestries. *Nat Genet* 51, 481-493.

1596 Singh, M.K., Christoffels, V.M., Dias, J.M., Trowe, M.-O., Petry, M., Schuster-Gossler, K.,  
1597 Bürger, A., Ericson, J., and Kispert, A. (2005). *Tbx20* is essential for cardiac  
1598 chamber differentiation and repression of *Tbx2*. *Development* 132, 2697-2707.

1599 Sinnamon, J.R., Torkency, K.A., Linhoff, M.W., Vitak, S.A., Mulqueen, R.M., Pliner, H.A.,  
1600 Trapnell, C., Steemers, F.J., Mandel, G., and Adey, A.C. (2019). The accessible chromatin  
1601 landscape of the murine hippocampus at single-cell resolution. *Genome Research* 29, 857-869.

1602 Song, M., Pebworth, M.-P., Yang, X., Abnoui, A., Fan, C., Wen, J., Rosen, J.D., Choudhary,  
1603 M.N.K., Cui, X., Jones, I.R., *et al.* (2020). Cell-type-specific 3D epigenomes in the developing  
1604 human cortex. *Nature*.

1605 Song, M., Yang, X., Ren, X., Maliskova, L., Li, B., Jones, I.R., Wang, C., Jacob, F., Wu, K.,  
1606 Traglia, M., *et al.* (2019). Mapping cis-regulatory chromatin contacts in neural cells links  
1607 neuropsychiatric disorder risk variants to target genes. *Nature Genetics* 51, 1252-1262.

1608 Stranger, B.E., Brigham, L.E., Hasz, R., Hunter, M., Johns, C., Johnson, M., Kopen, G.,  
1609 Leinweber, W.F., Lonsdale, J.T., McDonald, A., *et al.* (2017). Enhancing GTEx by bridging the  
1610 gaps between genotype, gene expression, and disease. *Nature Genetics* 49, 1664-1670.

1611 Strawbridge, R.J., Dupuis, J., Prokopenko, I., Barker, A., Ahlqvist, E., Rybin, D., Petrie, J.R.,  
1612 Travers, M.E., Bouatia-Naji, N., Dimas, A.S., *et al.* (2011). Genome-wide association identifies

1613 nine common variants associated with fasting proinsulin levels and provides new insights into  
1614 the pathophysiology of type 2 diabetes. *Diabetes* 60, 2624-2634.

1615 Stuart, C.A., Stone, W.L., Howell, M.E., Brannon, M.F., Hall, H.K., Gibson, A.L., and Stone,  
1616 M.H. (2016). Myosin content of individual human muscle fibers isolated by laser capture  
1617 microdissection. *Am J Physiol Cell Physiol* 310, C381-389.

1618 Stunnenberg, H.G., Abrignani, S., Adams, D., de Almeida, M., Altucci, L., Amin, V., Amit, I.,  
1619 Antonarakis, S.E., Aparicio, S., Arima, T., *et al.* (2016). The International Human Epigenome  
1620 Consortium: A Blueprint for Scientific Collaboration and Discovery. *Cell* 167, 1145-1149.

1621 Tachmazidou, I., Hatzikotoulas, K., Southam, L., Esparza-Gordillo, J., Haberland, V., Zheng, J.,  
1622 Johnson, T., Koprulu, M., Zengini, E., Steinberg, J., *et al.* (2019). Identification of new  
1623 therapeutic targets for osteoarthritis through genome-wide analyses of UK Biobank data. *Nat*  
1624 *Genet* 51, 230-236.

1625 Teumer, A., Chaker, L., Groeneweg, S., Li, Y., Di Munno, C., Barbieri, C., Schultheiss, U.T.,  
1626 Traglia, M., Ahluwalia, T.S., Akiyama, M., *et al.* (2018). Genome-wide analyses identify a role  
1627 for SLC17A4 and AADAT in thyroid hormone regulation. *Nat Commun* 9, 4455.

1628 Tin, A., Marten, J., Halperin Kuhns, V.L., Li, Y., Wuttke, M., Kirsten, H., Sieber, K.B., Qiu, C.,  
1629 Gorski, M., Yu, Z., *et al.* (2019). Target genes, variants, tissues and transcriptional pathways  
1630 influencing human serum urate levels. *Nat Genet* 51, 1459-1474.

1631 Traag, V.A., Van Dooren, P., and Nesterov, Y. (2011). Narrow scope for resolution-limit-free  
1632 community detection. *Phys Rev E Stat Nonlin Soft Matter Phys* 84, 016114.

1633 Traag, V.A., Waltman, L., and van Eck, N.J. (2019). From Louvain to Leiden: guaranteeing well-  
1634 connected communities. *Sci Rep* 9, 5233.

1635 Visel, A., Minovitsky, S., Dubchak, I., and Pennacchio, L.A. (2007). VISTA Enhancer Browser--a  
1636 database of tissue-specific human enhancers. *Nucleic Acids Res* 35, D88-92.

1637 Wakefield, J. (2009). Bayes factors for genome-wide association studies: comparison with P-  
1638 values. *Genet Epidemiol* 33, 79-86.

1639 Wang, A., Chiou, J., Poirion, O.B., Buchanan, J., Valdez, M.J., Verheyden, J.M., Hou, X.,  
1640 Kudtarkar, P., Narendra, S., Newsome, J.M., *et al.* (2020). Single-cell multiomic profiling of  
1641 human lungs reveals cell-type-specific and age-dynamic control of SARS-CoV2 host genes.  
1642 *Elife* 9.

1643 Wang, R.N., Green, J., Wang, Z., Deng, Y., Qiao, M., Peabody, M., Zhang, Q., Ye, J., Yan, Z.,  
1644 Denduluri, S., *et al.* (2014). Bone Morphogenetic Protein (BMP) signaling in development and  
1645 human diseases. *Genes & Diseases* 1, 87-105.

1646 Warrington, N.M., Beaumont, R.N., Horikoshi, M., Day, F.R., Helgeland, Ø., Laurin, C., Bacelis,  
1647 J., Peng, S., Hao, K., Feenstra, B., *et al.* (2019). Maternal and fetal genetic effects on birth  
1648 weight and their relevance to cardio-metabolic risk factors. *Nat Genet* 51, 804-814.  
1649 Watanabe, K., Stringer, S., Frei, O., Umićević Mirkov, M., de Leeuw, C., Polderman, T.J.C., van  
1650 der Sluis, S., Andreassen, O.A., Neale, B.M., and Posthuma, D. (2019). A global overview of  
1651 pleiotropy and genetic architecture in complex traits. *Nat Genet* 51, 1339-1348.  
1652 Weirauch, M.T., Yang, A., Albu, M., Cote, A.G., Montenegro-Montero, A., Drewe, P.,  
1653 Najafabadi, H.S., Lambert, S.A., Mann, I., Cook, K., *et al.* (2014). Determination and inference  
1654 of eukaryotic transcription factor sequence specificity. *Cell* 158, 1431-1443.  
1655 Wiberg, A., Ng, M., Schmid, A.B., Smillie, R.W., Baskozos, G., Holmes, M.V., Künnapuu, K.,  
1656 Mägi, R., Bennett, D.L., and Furniss, D. (2019). A genome-wide association analysis identifies  
1657 16 novel susceptibility loci for carpal tunnel syndrome. *Nat Commun* 10, 1030.  
1658 Wolock, S.L., Lopez, R., and Klein, A.M. (2019). Scrublet: Computational Identification of Cell  
1659 Doublets in Single-Cell Transcriptomic Data. *Cell Systems* 8, 281-291.e289.  
1660 Wright, V.J., Peng, H., Usas, A., Young, B., Gearhart, B., Cummins, J., and Huard, J. (2002).  
1661 BMP4-Expressing Muscle-Derived Stem Cells Differentiate into Osteogenic Lineage and  
1662 Improve Bone Healing in Immunocompetent Mice. *Molecular Therapy* 6, 169-178.  
1663 Wuttke, M., Li, Y., Li, M., Sieber, K.B., Feitosa, M.F., Gorski, M., Tin, A., Wang, L., Chu, A.Y.,  
1664 Hoppmann, A., *et al.* (2019). A catalog of genetic loci associated with kidney function from  
1665 analyses of a million individuals. *Nat Genet* 51, 957-972.  
1666 Yan, J., Qiu, Y., Santos, A.M.R.d., Yin, Y., Li, Y.E., Vinckier, N., Nariai, N., Benaglio, P., Raman,  
1667 A., Li, X., *et al.* (2021). Systematic Analysis of Transcription Factor Binding to Noncoding  
1668 Variants in the Human Genome. *Nature in press*.  
1669 Yan, M., Wang, H., Sun, J., Liao, W., Li, P., Zhu, Y., Xu, C., Joo, J., Sun, Y., Abbasi, S., *et al.*  
1670 (2016). Cutting Edge: Expression of IRF8 in Gastric Epithelial Cells Confers Protective Innate  
1671 Immunity against *Helicobacter pylori* Infection. *J Immunol* 196, 1999-2003.  
1672 Yin, H., Price, F., and Rudnicki, M.A. (2013). Satellite cells and the muscle stem cell niche.  
1673 *Physiol Rev* 93, 23-67.  
1674 Zhang, K., Wang, M., Zhao, Y., and Wang, W. (2019). Taiji: System-level identification of key  
1675 transcription factors reveals transcriptional waves in mouse embryonic development. *Science*  
1676 *Advances* 5, eaav3262.  
1677 Zhang, Y., Liu, T., Meyer, C.A., Eeckhoute, J., Johnson, D.S., Bernstein, B.E., Nusbaum, C.,  
1678 Myers, R.M., Brown, M., Li, W., *et al.* (2008). Model-based Analysis of ChIP-Seq (MACS).  
1679 *Genome Biology* 9, R137.

- 1680 Zhu, C., Preissl, S., and Ren, B. (2020). Single-cell multimodal omics: the power of many.  
1681 Nature Methods 17, 11-14.  
1682
